1  
2  
3  
4  
5  
6  
7  
8  
9  
10  
11  
12  
13  
14  
15  
16  
17  
18  
19  
20  
21  
22  
23  
24

**Restoration of DNA Integrity and Cell Cycle by Electric Stimulation  
in Planarian Tissues Damaged by Ionizing Radiation**

Devon Davidian<sup>1,2,#</sup>, Melanie LeGro<sup>1,2,#</sup>, Paul G. Barghouth<sup>1,2</sup>, Salvador Rojas<sup>1,2</sup>,  
Benjamin Ziman<sup>1,2</sup>, Eli Isael Maciel<sup>1,2</sup>, David Ardell<sup>1,4</sup>, Ariel L. Escobar<sup>3,4</sup> and  
Néstor J. Oviedo<sup>1,4\*</sup>

<sup>1</sup>Department of Molecular & Cell Biology, University of California, Merced, USA.

<sup>2</sup>Quantitative and Systems Biology Graduate Program, University of California, Merced, USA.

<sup>3</sup>Department of Bioengineering, University of California, Merced, USA.

<sup>4</sup>Health Sciences Research Institute, University of California, Merced, USA.

#Equal contribution

\*To whom correspondence should be addressed: Néstor J. Oviedo,

email: [noviedo2@ucmerced.edu](mailto:noviedo2@ucmerced.edu)

Department of Molecular & Cell Biology, University of California.

5200 North Lake Road, Merced, CA 95343

25 **Abstract:**

26 Exposure to high levels of ionizing  $\gamma$ -radiation leads to irreversible DNA damage and cell death.  
27 Here, we establish that exogenous application of electric stimulation enables cellular plasticity to  
28 reestablish stem cell activity in tissues damaged by ionizing radiation. We show that sub-  
29 threshold direct current stimulation (DCS) rapidly restores pluripotent stem cell populations  
30 previously eliminated by lethally  $\gamma$ -irradiated tissues of the planarian flatworm *Schmidtea*  
31 *mediterranea*. Our findings reveal that DCS enhances DNA repair, transcriptional activity, and  
32 cell cycle entry in post-mitotic cells. These responses involve rapid increases in cytosolic  $[Ca^{2+}]$   
33 through the activation of L-type  $Ca_v$  channels and intracellular  $Ca^{2+}$  stores leading to the  
34 activation of immediate early genes and ectopic expression of stem cell markers in postmitotic  
35 cells. Overall, we show the potential of electric current stimulation to reverse damaging effects  
36 of high dose  $\gamma$ -radiation in adult tissues. Furthermore, our results provide mechanistic insights  
37 describing how electric stimulation effectively translates into molecular responses capable of  
38 regulating fundamental cellular functions without the need for genetic or pharmacological  
39 intervention.

40

41 **Keywords:** electric stimulation | stem cells | DNA repair | planaria | neoblasts | tissue  
42 regeneration | galvanotactic

43

44

45

46

47

48

49

50

## 51 INTRODUCTION

52           Since the initial observations made by Luigi Galvani in the late 1700s, scientists have  
53 been fascinated by the effects of the exogenous application of electric currents in animal tissues  
54 (Adee, 2018; Bresadola, 1998). This long-lasting interest has revealed almost universal roles for  
55 electricity during embryonic development, tissue regeneration, and disease (Levin, 2007; Levin,  
56 2014; McCaig et al., 2005). For example, modern FDA approved applications of electric  
57 stimulation include deep brain stimulation where indwelling electrodes are implanted in specific  
58 regions of the brain to deliver electrical currents and treat diseases such as essential tremors,  
59 slow movement, and stiffness in Parkinson disease (Graupe et al., 2018; Miocinovic et al., 2013;  
60 Mohammed et al., 2018; Niemann et al., 2017; Velarde et al., 2017). Electric stimulation is also  
61 used in treatment-resistant (i.e., refractory) depression, which is the leading cause of disability  
62 worldwide (Bewernick et al., 2012; Delaloye and Holtzheimer, 2014; Holtzheimer et al., 2012;  
63 Mayberg et al., 2005; Organization, 2018). Recent studies with electric stimulation demonstrate  
64 the possibility to restore voluntary control of walking in animals and humans with spinal cord  
65 injury (Borgens et al., 1987; Formento et al., 2018; Wagner et al., 2018). Extensive clinical trials,  
66 over the past 50 years, demonstrate that direct current stimulation (DCS) improves bone healing  
67 by accelerating repair time and reducing pain in nonunion bone fractures (Aleem et al., 2016;  
68 Brighton, 1981; Brighton et al., 1981; Griffin and Bayat, 2011; Kuzyk and Schemitsch, 2009;  
69 Zhuang et al., 1997).

70

71           Additionally, DCS directly applied to the surface of the scalp, (i.e., without implanting  
72 electrodes) is known as transcranial DCS (tDCS) and is commonly used in humans (Antal et al.,  
73 2017; Chaieb et al., 2014; Chang et al., 2016; Elliott, 2014; Huang et al., 2015b; Kadosh, 2015;

74 Kadosh et al., 2010; Moreno-Duarte et al., 2014; Nelson et al., 2016; Sarkar and Kadosh, 2016;  
75 Tortella et al., 2015). tDCS is widely used to treat many human conditions including motor  
76 learning in stroke neurorehabilitation (Boggio et al., 2007), migraines (Antal et al., 2011; Antal  
77 et al., 2008), patients with chronic pain (Boggio et al., 2009; Boggio et al., 2008; Borckardt et al.,  
78 2012; Mylius et al., 2012), and psychiatric disorders (Tortella et al., 2015). Likewise, cognitive  
79 assessments have shown that tDCS can be used to modulate the rate of learning and improve  
80 numerical competence in humans (Kadosh, 2015; Kadosh et al., 2010; Snowball et al., 2013).  
81 Despite the widespread use of DCS in experimental, clinical, and private settings, the molecular  
82 bases of its effects in various cell types remain largely unknown. Together with the rapid  
83 proliferation and easy access to devices marketed as direct to customer technology involving  
84 electrical stimulation has raised ethical questions, produced confounding results, and created  
85 concerns about the risk of potential adverse effects in the body (Coates McCall et al., 2019;  
86 Wexler and Reiner, 2019; Wurzman et al., 2016).

87  
88       The effects of DCS vary depending on the location in the body, the tissue type that is  
89 targeted, the intensity of the electric current, and the duration of treatment. Furthermore, the  
90 outcome of DCS may differ depending on the context in which it is assayed (i.e., embryonic  
91 development, adult stages, disease or homeostasis). It is important to note that currents used in  
92 DCS are subthreshold, implying they do not induce action potentials in excitable cells/tissues  
93 (Bikson et al., 2004). All cells, including stem cells (SCs), progenitors, and differentiated cells,  
94 have built-in mechanisms designed to sense electric changes, which consequently influence their  
95 innate cellular transmembrane potential ( $V_{mem}$ ). Changes in  $V_{mem}$  are caused by changes in ion  
96 fluxes at the cell plasma membrane (Jaffe, 1981a; Jaffe, 1981b; Levin, 2007; McLaughlin and

97 Levin, 2018; Nuccitelli and Jaffe, 1974).  $V_{mem}$  acts as a potent regulator of cellular migration,  
98 proliferation, differentiation, cell cycle, and cell death and is highly sensitive to manipulation by  
99 DCS (Levin, 2014; McCaig et al., 2005). Furthermore, DCS, at the organismal level, is capable  
100 of altering axial polarity, tissue repair, and organ specification (Borgens et al., 1987; Jaffe,  
101 1981a; Marsh and Beams, 1952; McCaig et al., 2005; McLaughlin and Levin, 2018; Nuccitelli,  
102 2003; Zhao et al., 2006). For example, galvanotactic responses have been observed in migratory  
103 cells of humans (Guo et al., 2010), fish (Graham et al., 2013), frogs (Stump and Robinson,  
104 1983), *C. elegans* (Chrisman et al., 2016), and even Paramecium (Ogawa et al., 2006).  
105 Similarities in DCS-mediated cellular responses across vertebrate and invertebrate organisms  
106 argue for evolutionarily conserved mechanisms.

107  
108 To further investigate the effects of DCS, we developed an experimental strategy using  
109 the planarian flatworm *Schmidtea mediterranea*, known for their high rates of cellular turnover  
110 and extraordinary capacity to regenerate tissues that rely in adult SCs called neoblasts (Reddien,  
111 2018; Rink, 2018; Zeng et al., 2018b; Zhu and Pearson, 2016). Neoblasts are known as the only  
112 cell with the capacity to divide in asexually reproducing planarians. Thus, neoblast division  
113 alone provides the cellular progeny required to renew and repair all planarian tissues (van  
114 Wolfswinkel et al., 2014b; Wagner et al., 2011; Zeng et al., 2018b). This constant cellular  
115 crosstalk allows planaria to maintain a diverse cellular population through neoblast division,  
116 making them powerful models to analyze the effects of DCS on adult SCs and differentiated  
117 cells at the cellular, subcellular, and organismal level. Here, we introduced a simplified platform  
118 to apply exogenous DCS to the whole body of planarians and analyze the resulting cellular and  
119 subcellular responses in real-time. We found that brief exposure to DCS overrides cellular

120 decisions in tissues exposed to lethal doses of ionizing radiation. Furthermore, our results reveal  
121 that DCS is a rapid and robust method with the potential to enhance DNA damage repair,  
122 activate transcription of stem cell markers in tissues damaged by ionizing radiation. Moreover,  
123 we identified that these DCS-mediated responses are tightly regulated by transcription of  
124 immediate early genes and rapid intracellular  $\text{Ca}^{2+}$  flux. These findings provide insights into the  
125 effects of DCS in the adult body, exhibiting their domain over fundamental cellular processes  
126 such as transcription, DNA repair, cell cycle, and cellular plasticity without the need for genetic  
127 or pharmacological treatments.

128

## 129 **RESULTS**

130

### 131 **Body-wide Application of Steady-State Direct Current (pDCS)**

132 We immobilized planarians by applying our recently developed method (i.e.,  
133 ThermoPress immobilization), which combines the anesthetic chloretone (0.2%) with a 1% agar-  
134 encasing chamber (Davidian et al., 2020). This method of agar immobilization keeps planarians  
135 alive while preserving tissue integrity and restricting body movement for hours to days with  
136 complete and rapid recovery of sensory functions and locomotion (Fig. 1A). ThermoPress  
137 immobilization was used to administer steady-state direct current stimulation to the whole  
138 planarian body, which we coined ‘pDCS’ (Davidian et al., 2020).

139

140 Electric current was delivered through pulled borosilicate sharp microelectrodes, filled  
141 with 3M KCl, placed at the anterior and posterior ventral side of planarian (i.e., pre-pharyngeal  
142 and tail, respectively). The microelectrodes resistance was consistently measured at 1-2M $\Omega$ . The

143 control group (sham-treated), consisted of animals exposed to the same procedure, included  
144 electrode penetration, with the absence of electric current. To facilitate circuit conduction and  
145 minimize electrode byproduct in planarian tissues, microelectrodes were coupled to an electrode  
146 bath using 1.0% agar bridges containing 3M KCl solution (Fig. 1B). The amount of current  
147 delivered was limited through a 100M $\Omega$  resistor, and the most consistent results were obtained  
148 when the current traversing the animal was 7 $\mu$ A (Fig. 1C). DCS exceeding 7 $\mu$ A resulted in  
149 noticeable tissue damage and eventual animal lysis. All experiments were performed with an  
150 electric polarity of a positive pole in the anterior and negative pole in the posterior, unless  
151 otherwise stated. Current delivered to the animal was differentially measured and acquired with  
152 an analog-to-digital converting board controlled with custom-made LabView-based software  
153 (Elliott et al., 2007). Animals were under constant surveillance to ensure that electrode  
154 placement and tissue integrity were maintained. Overall, this setup was effective in keeping  
155 electrodes correctly positioned and allowed for the analysis of DCS for up to 6 hours.

156

### 157 **pDCS activates transcription of stem cell markers in tissues exposed to a lethal dose of** 158 **ionizing radiation**

159 DCS techniques are known to affect both SCs and differentiated cells in many model  
160 organisms (Feng et al., 2017; Huang et al., 2015a; McCaig et al., 2005; Zhao et al., 2006).  
161 Planarian neoblasts are generally scattered along the antero-posterior (AP) axis except for  
162 regions in front of the eyes or pharynx and uniquely express the gene *smedwi-1* (Reddien et al.,  
163 2005; van Wolfswinkel et al., 2014b; Wagner et al., 2011; Zeng et al., 2018b) (*piwi-1* henceforth,  
164 Fig. 2A). The *piwi-1* expression is currently used as the standard marker to recognize neoblast  
165 presence and distribution (Reddien et al., 2005; Wagner et al., 2011; Zeng et al., 2018b).

166 Exposing planarians to lethal doses of ionizing radiation (60 Gy) irreversibly eliminates  
167 neoblasts and corresponding *piwi-1* expression (Fig. 2A); consequently, abolishing their  
168 regenerative capabilities. As a result, planarians ultimately perish within three to four weeks  
169 following lethal ionizing radiation (Bardeen and Baetjer, 1904; Reddien et al., 2005). However,  
170 lethally irradiated planarians can be rescued by transplanting tissue-containing neoblasts  
171 (Guedelhofer and Sanchez Alvarado, 2012a; Guedelhofer and Sanchez Alvarado, 2012b). This  
172 occurs as neoblasts gradually migrate from transplanted tissues to repopulate the entire irradiated  
173 host in about a month (Guedelhofer and Sanchez Alvarado, 2012a). Engrafted tissue becomes  
174 more structurally stable after four days post-transplantation (dpt); a stage in which the majority  
175 of neoblasts are still within the transplanted tissue. Over the first five dpt, neoblast repopulation  
176 is uniform with no bias towards anterior, posterior, medial-lateral tissues (Guedelhofer and  
177 Sanchez Alvarado, 2012a). Thus, this neoblast repopulation paradigm was used as a model to  
178 study the effects of pDCS on both adult SCs and differentiated cells in their natural environment.

179  
180 Tissue containing neoblasts was transplanted into lethally irradiated hosts and pDCS-  
181 treated at four dpt (Fig. 2B). This experimental setup led to essential differences in *piwi-1* gene  
182 expression in sham vs. pDCS animals. Specifically, 60 minutes after pDCS, *piwi-1* expression  
183 was widely detected outside the transplant toward the posterior region of the animal; whereas, in  
184 the sham-treated group, *piwi-1* expression was restricted to tissues adjacent to the transplant, as  
185 expected (Fig. 2C). Levels of *piwi-1* expression in the tails of treated planarian increased by  
186 more than two-fold as determined by using qPCR (Fig. 2D). Transcriptomic analysis with RNA  
187 sequencing from the tail fragment confirmed pDCS treatment for 60 mins was accompanied by  
188 an increase in the expression of *piwi-1* (Log<sub>2</sub> FC= 1.97, B&H FDR= 0.0006, moderated t= 9.89).



189 Furthermore, we also detected an increase in the expression of the transcription factor *Smed-*  
190 *soxp-2* (Fig. 2E, Log2 FC= 0.61, B&H FDR= 0.005, moderated t= 4.82), which is a marker of  
191 the classic sigma neoblast subpopulation required for stem cell function and planarian  
192 regeneration (van Wolfswinkel et al., 2014a; Wagner et al., 2012). Likewise, we observed pDCS  
193 slightly reduced the expression of the *piwi* family member *Smed-piwi-3* after 60 mins of pDCS  
194 (Log2 FC= 0.21, B&H FDR= 0.0068, moderated t= 4.24) (Kim et al., 2019; Palakodeti et al.,  
195 2008b), while there was moderately upregulation of the late progeny marker *Smed-agat-1* (Fig.  
196 2E, Log2 FC= 0.18, B&H FDR= 0.016, moderated t= 3.74).

197  
198 We also observed differential expression of other markers (Fig. 2F) associated with the  
199 recently expanded neoblast sub-classes (Zeng et al., 2018a). Out of 189 possible Nb markers  
200 from the literature 25 markers were differentially expressed with a B&H FDR < 0.05. The  
201 transcriptomic analysis tested the contrasts between the 60-minute and sham controls evidencing  
202 1,778 genes differentially expressed and all 25 of these markers are expressed below the 1%  
203 level. The transcriptomic analysis for the tissues treated with 60 minutes of pDCS showed key  
204 markers for the neoblast sub-classes Nb5, Nb8, and Nb12 were strongly downregulated  
205 compared to the control at this timepoint (Fig. 2F). Nb5 and Nb12 contain populations of *Piwi-*  
206 *I<sup>high</sup>* expressing cells and are hypothesized to include early progenitor cells for intestinal tissue  
207 (B&H FDR <0.05). Conversely, markers for the muscle cell progenitors Nb4 and Nb6 (e.g.,  
208 TDP2, TPI1, and ACTB) were significantly upregulated (Fig. 2F, B&H FDR <0.01). Muscle  
209 progenitors are critical for providing positional information and are key drivers of tissue  
210 patterning during regeneration (Cote et al., 2019; Scimone et al., 2020; Scimone et al., 2017).  
211 Additionally, putative markers for the pharyngeal neoblast progenitors and differentiated

212 populations (Nb7, Nb8, and Nb10) were overall differentially expressed. However, the markers  
213 *PTK7* and *PPIC* for the *Piwi-I<sup>high</sup>* expressing pharyngeal progenitor populations (Nb7 and Nb8)  
214 had lower expression compared to the *Piwi-I<sup>low</sup>* differentiated pharyngeal populations (Nb10)  
215 (B&H FDR <0.05). The markers *PDIA6*, *CALU*, and *P4HB* for the Nb10 neoblasts were  
216 significantly upregulated after hour-long application of pDCS (B&H FDR <0.05). Only one  
217 marker (dd\_Smed\_v6\_1399\_0\_1) for the putative neural progenitor (Nb11) was significantly  
218 upregulated after 60 minutes of pDCS (Fig. 2F, Log2 FC= 0.34, B&H FDR= 40.043, moderated  
219 t= 3.71). Importantly, key markers for clonogenic neoblasts (cNeoblasts, Nb2) were significantly  
220 upregulated (e.g., *Aats-asp* and *soxP-2*; Fig. 2E, F, Log2 FC> 0.5, B&H FDR <0.01). Our  
221 findings show that the hour-long application of pDCS triggers the expression of the pan-neoblast  
222 marker *piwi-1* along with markers of neoblast subpopulations with high *piwi-1* expression in host  
223 tissues where neoblasts were permanently eliminated by exposure to a lethal dose of ionizing  
224 radiation.

225

## 226 **Lengthening pDCS leads to a directional cell cycle entry in tissues exposed to lethal ionizing** 227 **radiation**

228 pDCS-induced transcription of *piwi-1* in irradiated tissue was also accompanied by an  
229 increase in the expression of the neoblast marker *Smed-cyclin B* and other components associated  
230 with the regulation of cell division (e.g., cyclin-dependent kinases, mini-chromosome  
231 maintenance proteins-MCM-, checkpoint kinase, polo-like kinase, and Rb binding protein), (Fig.  
232 2G, H). However, the presence of mitotic cells far away from the transplanted tissue was evident  
233 after lengthening pDCS to 6 hours (Fig. 2I, J). Strikingly, the number of mitotic cells outside of  
234 the transplant was significantly increased upon pDCS (Fig. 2K). In these animals, mitotic cells

235 within irradiated tissues were primarily distributed towards the posterior region of the host, being  
236 observed as far as the tip of the tail (Fig. 2K). Proportionately, a smaller number of mitotic  
237 events occurred in the anterior of pDCS-treated transplanted planarians, implying asymmetrical  
238 effects likely due to pDCS polarity (Fig. 2K). In the sham control group, we did not observe  
239 asymmetries in dividing cells within the scarce population of mitotic cells outside transplanted  
240 tissues (Fig. 2I-K). We also observed variability in the effects of pDCS over mitotic cells. Some  
241 animals showed a low/no response (26%) while the large majority displayed moderate effects  
242 (67%) by noticeable mitotic signal outside of the transplant (Figure S1A).

243  
244 To address the possibility of pDCS induced mitotic asymmetry within irradiated tissues,  
245 similar magnitude DCS were applied to 4dpt planarian with opposite polarity (i.e., reversed  
246 polarity, implying the positive pole located in the tail and the negative pole in pre-pharyngeal  
247 tissue in front of the transplant). These experiments led to inconsistent results, thus we decided  
248 to continue with the characterization of pDCS based on polarity with positive pole to the anterior  
249 and negative implanted in the posterior region of the animal. We also found pDCS displayed  
250 similar effects when the tissue graft was placed in the posterior region (Fig. S1B, C). However,  
251 tissue transplants in the anterior region were more reliable and convenient to characterize the  
252 pDCS effects.

253  
254 **pDCS-induced transcription of stem cell markers originates in lethally irradiated tissues**

255 Exposure to a lethal dose of ionizing radiation permanently eliminates neoblasts in less  
256 than 24 hours (Peiris et al., 2016a). Distinctively, pDCS leads to the transcription of neoblast  
257 markers and the presence of mitotic cells in the host tissue several days after the exposure to

258 lethal ionizing radiation. This finding prompted us to investigate the potential source of neoblast-  
259 related cells.

260  
261 First, since the exogenous application of electric fields is widely known to guide  
262 movement of cells through electrotaxis (McCaig et al., 2005), we addressed dynamics of cell  
263 migration from the transplanted tissue as the potential mediator of pDCS effects. Previous work  
264 determined, neoblasts migrate from transplanted tissue to gradually repopulate the lethally  
265 irradiated host at a rate of  $\sim 3\text{-}5\mu\text{m/hr}$ , which is about  $72\text{-}120\mu\text{m/day}$  (Abnave et al., 2017;  
266 Eisenhoffer et al., 2008b; Guedelhofer and Sanchez Alvarado, 2012a; Guedelhofer and  
267 Sanchez Alvarado, 2012b; Newmark and Sánchez Alvarado, 2000; Reddien et al., 2005; Salo  
268 and Baguna, 1985). Because neoblasts are the only dividing cells in planarian, the spatiotemporal  
269 path of neoblast-related gene expression and mitotic cells (i.e. mitotic wave) are commonly used  
270 to infer migration rates between two points (Abnave et al., 2017; Guedelhofer and Sanchez  
271 Alvarado, 2012a; Guedelhofer and Sanchez Alvarado, 2012b; Newmark and Sánchez Alvarado,  
272 2000; Salo and Baguna, 1985).

273  
274 Our results show that following 6hrs of pDCS, mitotic cells are found in the tail of the  
275 irradiated host, which is  $\sim 5\text{ mm}$  away from the transplanted tissue (Fig. 2I, J). If the transplanted  
276 tissue was the source of dividing cells, neoblasts must displace at about  $833\mu\text{m/hr}$  (i.e.  $\sim 200$   
277 times faster) to arrive at the tip of the tail more than 700 hours earlier than what has previously  
278 been reported (Guedelhofer and Sanchez Alvarado, 2012a; Salo and Baguna, 1985).  
279 Furthermore, we found that shorter pDCS leads to a robust *piwi-1* expression throughout the  
280 animal (see results below Fig. 5A with 15 mins pDCS). Were this to be the result of cellular

281 migration from the engrafted tissue, neoblasts must migrate at rates exceeding 20,000 $\mu$ m/hr, or  
282 2cm/hr; which is not only four orders of magnitude faster than previously established but also  
283 unlikely due to physical tissue-derived obstacles in their path.

284

285 Second, recent findings demonstrate cellular migration in planarians depends on the  
286 expression of epithelial-mesenchymal transcription factors *Snail-1*, *Snail-2*, *zeb-1*, and the  $\beta$ 1-  
287 *integrin* gene along with components of matrix metalloproteinase (Abnave et al., 2017; Bonar  
288 and Petersen, 2017; Isolani et al., 2013; Seebeck et al., 2017). We compared in sham and pDCS  
289 treated animals the expression of markers for cellular migration in two segments, the trunk  
290 fragment that included transplanted tissue and the tail region at one hour of treatment (Fig. 3A).  
291 The results show that in the trunk the expression increased for both *Snail-1*, *Snail-2* while there  
292 was no change for *zeb-1* and the  $\beta$ 1-*integrin*. In the tail region, we found no changes in the  
293 expression except for a slight increase in the  $\beta$ 1-*integrin* gene (Fig. 3B, C). Next, we used BrdU  
294 to trace migratory cells, but our attempts were unsuccessful due to inconsistent tissue  
295 engraftment likely associated with friability of tissue fragments obtained from donors treated  
296 with BrdU.

297

298 Third, we did not observe the anterior to a posterior progressive pattern of neoblast  
299 expressing cells nor dividing cells that is characteristic during migration-mediated neoblast  
300 repopulation of the irradiated host. For instance, stimulation with pDCS using shorter times (i.e.,  
301 15 mins) showed strong expression of *piwi-1* at distant places from the transplanted tissue (see  
302 results below Fig. 5A at 15 mins). These findings are in stark contrast to the gradual progression  
303 of gene expression of *piwi-1* over the AP axis that takes about 40 days to reach the tip of the tail

304 in the absence of electrical stimuli (Abnave et al., 2017; Guedelhofer and Sanchez Alvarado,  
305 2012b).

306  
307 Fourth, we designed a series of experiments involving tissue transplantations between,  
308 wild type (WT), *piwi-1(RNAi)*, and lethally irradiated animals to measure the expression of  
309 neoblast markers in the tail region of the host (Figs. 3D, F, H). We performed selective  
310 elimination of *piwi-1* expression in either the host or donor tissue to verify the source of *piwi-1*<sup>+</sup>  
311 cells and other progenitor subtypes. It is important to note that *piwi-1(RNAi)* specifically silences  
312 *piwi-1* expression without affecting neoblast number or function (Reddien et al., 2005).  
313 Transplanting tissue from *piwi-1(RNAi)* animal into a lethally  $\gamma$ -irradiated host resulted in a six-  
314 fold increase in *piwi-1* expression in the tail of the host subjected to pDCS compared to sham-  
315 treated animals (Fig. 3D, E). The increase in gene expression was also prominent in other  
316 neoblast markers, suggesting a generalized neoblast response (Fig. 3E). Since *piwi-1* expression  
317 was originally silenced in the transplanted tissue, the increased expression of *piwi-1* away from  
318 the transplant; specifically, in the tail suggests, *piwi-1* expression originates in host tissues. To  
319 confirm this, tissue containing neoblasts from WT animals was transplanted into *piwi-1(RNAi)*  
320 host and subjected to identical treatment (Fig. 3F). The results show that *piwi-1* expression was  
321 equivalent to sham-treated as expected, but there was an important increase in the expression of  
322 other neoblast markers in the tail of animals with pDCS (Fig. 3G). These findings confirm the  
323 specificity of the RNAi strategy and provide evidence in support that lethally irradiated host  
324 tissue is the source of expression for neoblast markers upon pDCS.

325

326           However, it remained unclear whether the presence of neoblast in the graft was needed  
327 for the pDCS effects. To address this, neoblasts were eliminated from both the donor and host  
328 tissue by lethal  $\gamma$ -irradiation (Fig. 3H). Under these conditions, *piwi-1* expression remained  
329 similar to sham control (Fig. 3I), while there was a mixed effect in the expression of markers of  
330 neoblast (i.e., most of them were either reduced or did not change except for *sox-P-2*, Fig. 3I).  
331 We also noted that application of pDCS in a lethally irradiated animal without transplanted tissue  
332 did not trigger expression or neoblast markers or cell division. These results suggest that the  
333 presence of neoblasts in transplanted tissue is necessary for pDCS-mediated expression of  
334 neoblast markers. Together, our findings indicate that pDCS elicits transcription of SC markers  
335 in lethally irradiated tissues, effects that emerge from host tissues but require the presence of  
336 grafted neoblasts. Nevertheless, based on the spatio-temporal expression pattern of genes  
337 required for migration, the rapid presence of *piwi-1* expressing cells, and cellular division upon  
338 short application of electric stimulation, we propose that pDCS-induced effects on neoblast  
339 transcription and cell division are not due to electrotactic cellular migration from the transplanted  
340 tissue but rather through the activation in the expression of neoblast progenitors and subsequent  
341 cell division originating in lethally irradiated host tissue.

342

### 343 **pDCS enhances the DNA damage repair response in tissues exposed to a lethal dose of** 344 **ionizing radiation**

345           Exposure to a high dose of ionizing radiation induces DNA damage and subsequent cell  
346 death (Barghouth et al., 2019; Peiris et al., 2016a; Peiris et al., 2016b; Pellettieri et al., 2010).  
347 Nonetheless, 60 minutes of pDCS activates gene transcription, a process known to require DNA  
348 integrity. Therefore, we assessed DNA integrity and repair mechanisms on dissociated cells

349 obtained from the lethally irradiated tail region of both the sham-treated and pDCS group.  
350 Ionizing radiation increases DNA double-strand breaks (DSBs) that, in planarians, are mainly  
351 repaired through homologous recombination (HR) (Barghouth et al., 2019; Peiris et al., 2016b).  
352 Immunostainings using markers of DNA damage and repair response were used after 60 mins of  
353 treatment in sham and pDCS groups. The results revealed pDCS led to a noticeable increase in  
354 phosphorylation of the histone H2AX ( $\gamma$ -H2Ax, Fig. 4A), which is often observed in the early  
355 response to DSBs (Bonner et al., 2008; Marti et al., 2006). Likewise, pDCS increased  
356 RAD51 protein nuclear localization by 20% (Fig. 4B).

357  
358 Nuclear translocation is essential for the function of RAD51 during DSB repair (Haaf et  
359 al., 1999; Peiris et al., 2016b). We further determined, through comet assay, that pDCS-mediated  
360 activation of the DDR was accompanied by a noticeable reduction in DSBs caused by  $\gamma$ -  
361 irradiation (Fig. 4C). The results were expanded by performing transcriptomic analysis with a  
362 focus on genes associated with DNA damage and repair. RNA was extracted from the tail  
363 fragments from sham and pDCS animals after 60 mins of treatment and we used BLAST  
364 domains as annotations for the transcriptome dd\_Smed\_v6 (Grohme et al., 2018). When  
365 examining orthologs of DNA damage and repair pathways in *H. sapiens* the analysis confirmed  
366 genes associated with these pathways were differentially expressed with a majority upregulated  
367 (e.g., *ATM*, *RAD17*, *MRE11*, *Rad54B*) (Fig. 4D, E, Supplemental file 1). A gene enrichment  
368 analysis was used to identify the strongly activated pathways after 60 minutes of applied pDCS  
369 (Supplemental file 2). The biological processes for DNA damage checkpoints and DNA integrity  
370 checkpoints (GO:0000077 and GO:0031570) were considered significantly enriched (KS=  
371 0.0424 and significance 33%, respectively). The biological processes for cellular respiration



372 (GO:0045333), generation of precursor metabolites (GO:0006091), and molecular transport  
373 (GO:0008272, GO:0015698, GO:0015698, GO:0072348) were the most highly enriched  
374 biological processes. Cellular component genes involved with the nucleus were considered the  
375 most enriched cellular components at this time point (Supplemental file 2). This is supported by  
376 the enriched molecular functions for nucleotide-binding (GO:0000166), RNA binding  
377 (GO:0003723), translation factor activity, RNA binding (GO:0008135), and additional functions  
378 involved in nucleic acid activity (Supplemental file 2). The most enriched functions upregulated  
379 by pDCS compared to the sham control were catalytic activity (GO:0003824) which showed that  
380 21% of genes annotated with this term were significantly differentially expressed (Supplemental  
381 file 2). These data suggest nucleic acid activity is highly enriched upon an hour-long application  
382 of pDCS.

383  
384 In addition to the upregulated DNA repair and DNA damage transcripts, there was a  
385 strong upregulation of transcripts associated with replication (Fig. S2, Supplemental file 1).  
386 Approximately 60% of significantly differentially expressed genes related to replication were  
387 upregulated and further supports the notion that nucleic acid activity is enriched upon application  
388 of hour-long pDCS treatment. pDCS effects were also accompanied by improvements in cell  
389 viability as determined by flow cytometry with annexin V and immunostaining using Caspase-3  
390 antibody (Peiris et al., 2016a; Thiruvalluvan et al., 2018). We did observe reduced levels of pre-  
391 apoptotic cells compared to the sham-treated group (Fig. 4F). Consistently, we also noticed a  
392 reduction in pro-caspase-3<sup>+</sup> cells that are commonly associated with pre-apoptotic cells (Fig.  
393 4G). These results were accompanied by differential expression of genes known to regulate  
394 apoptosis (Fig. 4H, Supplemental file 1). In summary, these findings demonstrate that 60

395 minutes of pDCS is capable of activating DNA repair, DNA damage, and replication  
396 mechanisms leading to reduced overall DNA damage in lethally  $\gamma$ -irradiated tissues.

397

### 398 **pDCS activates transcription of immediate early genes in lethally irradiated tissues**

399 Previous work demonstrates the capacity for electric stimulation to produce rapid cellular  
400 responses, beginning at the transcriptional level (Dragunow and Robertson, 1987; Saha et al.,  
401 2011). To determine if pDCS treatment is capable of influencing transcription of neoblast  
402 markers on a more rapid time scale, tissue from WT animals was grafted into lethally irradiated  
403 hosts and exposed to different lengths of pDCS (i.e., 15, 30, 45 min; Fig. 5A). Strikingly,  
404 expression of *piwi-1* and other neoblast markers were not only detected but found maximally  
405 enriched during the first 15 min of pDCS (Fig. 5A-C). The expression of these neoblast-specific  
406 genes gradually reduced over time (Fig. 5A-C). Transcriptomic analysis using tail fragments  
407 from the 15 mins timepoint showed a strong upregulation in the expression of *Smed-SoxP-2*,  
408 *Smed-Agat-1*, *piwi-1-3* that are markers of the sigma and pan-neoblast populations according to  
409 the classic classification (Fig. 5D, B&H FDR <0.05, Supplemental file 3) (Eisenhoffer et al.,  
410 2008a; Kim et al., 2019; Palakodeti et al., 2008a; van Wolfswinkel et al., 2014a). Moreover, we  
411 also detected significant differential expression of 35 out of 189 markers (Fig. 5E) associated  
412 with various neoblast subclasses (Supplemental file 3) (Zeng et al., 2018a). In general, there was  
413 a strong upregulation in the expression of markers associated with cNeoblast (Nb2) and  
414 progenitors of the pharynx, (Nb7), epidermal (Nb1), and muscle (Nb4, Nb6) after 15 mins of  
415 pDCS (Fig. 5E, B&H FDR= 0.05, Supplemental file 3).

416

417 This rapid upregulated transcription pattern was also observed in markers of DNA  
418 damage response, DNA repair, and DNA replication (Fig. S3A-C). A gene Set Enrichment  
419 Analysis (GSEA) with the topGO Komogorov-Smirnoff test of these data shows the most  
420 enriched biological processes occurring after 15 minutes of pDCS are related to metabolic and  
421 transport processes (Supplemental file 2). This is also consistent with 40% enrichment of genes  
422 related to the mitochondrial outer membrane (GO:0005741). The most enriched molecular  
423 function at this early timepoint were genes related to the catalytic activity (GO:0003824) where  
424 21.7% (413) genes were found significantly enriched. RNA binding activity (GO:0003723)  
425 genes showed enrichment with 19.6% of genes being significant (Supplemental file 2). Overall,  
426 the enrichment analysis suggests DNA damage, repair, and cell cycle processes are activated  
427 early upon application of pDCS. Plotting statistically significant genes orthologous to all genes  
428 involved in DNA damage, DNA repair, and replication pathways was consistent with the  
429 identification of upregulation in critical DNA repair genes. For example, Rad54 and Rad51 are  
430 upregulated with a LogFC increase greater than 1.2 (Fig. S4B, B&H FDR= 0.05). Checkpoint  
431 Kinase 1 (CHK1) is a critical mediator of DNA damage response and cell cycle activation and  
432 upregulated by 1.7-fold with early application of pDCS (B&H FDR= 0.01, moderated  $t= 5.98$ ).  
433 DNA polymerases, helicases, and topoisomerases are upregulated two-fold. Cyclin-dependent  
434 kinase 1 (CDK1) exhibits the strongest increase of expression by nearly four-fold and further  
435 demonstrates the strong activation of cell cycle pathways (B&H FDR= 0.0046, moderated  $t=$   
436 4.72). In comparison, the expression of CHK1 and CDK1 at the 60 mins timepoint is slightly  
437 dampened which supports the high enrichment of cell cycle regulators in the GSEA after 15  
438 minutes pDCS (Supplemental file 2). The results indicate pDCS elicits a rapid transcriptional

439 response geared toward markers of neoblast, DNA damage, and repair within the hosts irradiated  
440 tissues.

441  
442 These remarkably rapid changes in gene expression after pDCS are temporally consistent  
443 with activation of immediate-early gene (IEG) transcription, generally defined as genes  
444 expressed in the absence of *de novo* protein synthesis (Bahrami and Drablos, 2016; Greer and  
445 Greenberg, 2008; Herschman, 1991; Morgan and Curran, 1991; Saha and Dudek, 2013).  
446 Furthermore, the mRNA of IEGs are detectable within minutes of exposure to a wide range of  
447 stimuli such as stress, mitogens, immune response, neuronal signals, and electric stimulation  
448 (Bahrami and Drablos, 2016; Cohen and Greenberg, 2008; Greer and Greenberg, 2008; Saha and  
449 Dudek, 2013). pDCS time-course qPCR results show a rapid and transient expression of a well-  
450 characterized member of the IEG family, *early growth response gene-1* (*egr-1*, Fig. 5C), which  
451 is a well-characterized member of the IEG family (Bahrami and Drablos, 2016; Greer and  
452 Greenberg, 2008) and an established neoblast marker required for regeneration and stem cell  
453 function in planarians (Lei et al., 2016; Sandmann et al., 2011; Tu et al., 2015a; Wagner et al.,  
454 2012; Zeng et al., 2018a).

455  
456 IEGs are classified based on their induction profile and separated into rapid, delayed, or  
457 slow expression response groups following a stimulus (Bahrami and Drablos, 2016; Saha and  
458 Dudek, 2013). Thus, we compiled a list of 138 known IEGs previously reported in other model  
459 organisms (Figure S4) (Cullingford et al., 2008; Tullai et al., 2007; Uhlitz et al., 2017) and  
460 matched the respective expression of their putative planarian orthologs following pDCS. Genes  
461 that were considered significantly differentially expressed at the 15mins timepoint were listed

462 following *p*-value and FDR cut-offs of <0.05; this yielded a total of 1778 up-regulated genes.  
463 Out of 1778 genes we found 25 planarian orthologs to published IEGs in the 15min pDCS  
464 treated planarian (Fig. 5F, S4). This analysis confirmed the upregulated expression of *egr-1* and  
465 revealed that the increased expression of IEGs persists through the hour-long application of  
466 pDCS (Log2FC= 1.32, B&H FDR= 0.0013, moderated *t*= 7.42). Additionally, other members of  
467 the immediate early genes were considerably upregulated after 15 mins pDCS treatment  
468 including the RAS oncogene and the dual-specificity phosphatase 10 (DUSP10) that is known to  
469 affect components of the mitogen-activated protein kinases (MAPKs), JNK and ERK (Fig. 5F).  
470 Within the 25-planarian putative IEGs we found representation for all three subclasses (IEG,  
471 DEG, and ILG) and the number of upregulated and downregulated members of those groups  
472 were split. It is not entirely clear how pDCS transcriptional regulation of IEGs is translated into  
473 cellular actions, but our observations suggest that short treatment with pDCS stimulates the rapid  
474 induction of IEGs within lethally irradiated tissues.

475

#### 476 **pDCS induces ectopic expression of neoblast markers mediated by Ca<sup>2+</sup> signaling**

477 Since exposure to a lethal dose of irradiation irreversibly eliminates neoblasts, we  
478 assessed the identity of host-cells expressing neoblast markers following 15 minutes of pDCS.  
479 To recognize the spatiotemporal distribution of cells at different stages of differentiation, we  
480 performed expression analysis using double fluorescent *in situ* hybridization (FISH) in tissue  
481 sections (Fig. 6A). Specific genes were chosen to reflect two distinct stages of cellular  
482 differentiation, *piwi-1* and *agat-1*, which label early progenitors and late post-mitotic progeny,  
483 respectively (Eisenhoffer et al., 2008b). Our results show that 15 min pDCS induces a 56-fold  
484 increase in *piwi-1*<sup>+</sup> cells and this upregulation coincides with a simultaneous 21-fold increase in

485 *agat-1*<sup>+</sup> cells (Fig. 6B, C). Intriguingly, 70.1% of *agat-1*<sup>+</sup> cells co-express *piwi-1* while 24.5% of  
486 *piwi-1*<sup>+</sup> cells co-express *agat-1* (Fig. 6B). Moreover, sham control planarian exhibited minimal  
487 *piwi-1*<sup>+</sup>/*agat-1*<sup>+</sup> cells, as expected in 4-day post-irradiated tissue (Fig. 6A, C). Previous research  
488 reported minimal, if any, the overlap between *piwi-1* and *agat-1* occurs in WT planarian (<  
489 2.0%) (Eisenhoffer et al., 2008b). The ectopic expression of the neoblast marker in post-mitotic  
490 cells suggests that the brief application of pDCS disrupts patterns of gene expression across  
491 cellular lineages.

492  
493 Calcium signaling is among the most prominent mediator of excitation-transcription  
494 coupling and IEG activation (Greenberg et al., 1986; Greer and Greenberg, 2008; Saha and  
495 Dudek, 2013; Saha et al., 2011; Yan et al., 2014). For example, voltage-dependent calcium  
496 channels at the plasma membrane can be electrically stimulated to allow the rapid influx of Ca<sup>2+</sup>  
497 to the cytoplasm (Yan et al., 2014). Similarly, calcium signaling mechanisms have been  
498 suggested as mediators of acute signaling events in various experimental models, including  
499 planarian (Bahrami and Drablos, 2016; Chan et al., 2017; Cohen and Greenberg, 2008;  
500 Greenberg et al., 1986; Greer and Greenberg, 2008; Herschman, 1991; Kandel, 2012; Ma and  
501 Yan, 2014; Marchant, 2019; Morgan and Curran, 1991; Saha and Dudek, 2013; Saha et al., 2011;  
502 West and Greenberg, 2011; Yan et al., 2014). In concert with these reported findings, inhibiting  
503 calcium flux through L-type voltage-gated calcium (Ca<sub>v</sub>) channels using a dihydropyridine  
504 (DHP), nifedipine, dramatically suppressed the effects of rapid (15 min) pDCS-mediated  
505 expression of neoblast markers (Fig. 6D, G, J). The effects of nifedipine inhibition persist even  
506 if pDCS was extended to 60 minutes (Fig. S5 A-C). These results were confirmed with  
507 nifedipine, another DHP that blocks L-type Ca<sub>v</sub> channels via a different high-affinity binding site

508 (Fig. S5 D-G). Likewise, buffering of intracellular  $\text{Ca}^{2+}$  with EGTA-AM [ethylene glycol-bis( $\beta$ -  
509 aminoethyl ether)-N,N,N',N'-tetraacetoxyethyl ester] also disrupts pDCS-mediated *piwi-1* and  
510 *agat-1* expression (Fig. 6H, E, G, K). These results suggest that  $\text{Ca}^{2+}$  released from intracellular  
511  $\text{Ca}^{2+}$  stores (i.e., endoplasmic reticulum) mediate pDCS effects.

512

## 513 **DISCUSSION**

514 Our findings underscore the overriding capacity of bioelectric signaling to rapidly affect  
515 essential cellular processes such as transcription, cell cycle, and DNA repair. This robust and  
516 effective strategy is capable of altering cellular behavior *in situ*, without the need for genetic or  
517 pharmacological intervention. The results in planarians are consistent with the overriding effects  
518 obtained with DCS in mice models of the Rett syndrome (RTT). The RTT is caused by  
519 inactivation of the X-linked gene methyl-CpG-binding protein 2 (*MECP2*) (Amir et al., 1999)  
520 and is a complex degenerative dysfunction involving many genes and neuronal groups, in which  
521 pharmacotherapy is unlikely to succeed (Baker et al., 2013; Chahrour et al., 2008; Johnson et al.,  
522 2017; Sugino et al., 2014). However, application of DCS with electrodes implanted in the brain  
523 of RTT mouse model, activate neurogenesis and restore neural circuits and spatial memory, and  
524 the behavior of the experimental group is indistinguishable from sham-treated mice (Hao et al.,  
525 2015; Lu et al., 2016; Pohodich et al., 2018). Jointly, the results in both vertebrate and  
526 invertebrates suggest the overriding effects of DCS (pulsing or steady-state) consistently  
527 overcome conditions involving dysfunctional DNA.

528

529 We introduce planarians as a simplified platform to carry out comprehensive analysis  
530 aimed at dissecting the molecular basis of electric stimulation at the organismal, cellular, and

531 subcellular levels. We observe extensive commonalities between DCS effects in planarians and  
532 mammals. For example, the time and strength of the currents used in our DCS are similar to the  
533 ones used in humans (e.g. tDCS, muscle, bone repair) (Gerovasili et al., 2009; Kadosh et al.,  
534 2010; Moreno-Duarte et al., 2014).  $Ca^{2+}$  signaling consistently recurs as a mediator of DCS  
535 effects in planarians and mammals. Likewise, the overall changes upon pDCS are transient, thus  
536 providing self-contained regulatory mechanisms that can be calibrated to gain desired cellular  
537 responses under different circumstances. Uniquely, our findings demonstrate a cost and time-  
538 effective alternative to study rapid activation of transcription in tissues exposed to high doses of  
539 ionizing radiation. DNA damage is central to cancer, aging, and radiotherapy, but there are  
540 limited options to effectively enhance genomic repair. We present evidence demonstrating short  
541 exposure to pDCS activates transcription of genes involved in the DDR, which together lead to  
542 the reestablishment of DNA integrity in tissues exposed to a high dose of ionizing radiation.  
543 Future experiments will be designed to address both the fidelity of pDCS-induced DNA repair  
544 and the molecular mechanism mediating this process. One possible candidate may involve small  
545 non-coding RNAs (sncRNAs), which recent evidence shows may facilitate the recruitment of  
546 repair components in both HR and NHEJ to sites of DSBs (Gao et al., 2014; Qi et al., 2016; Wei  
547 et al., 2012).

548  
549 pDCS triggers the ectopic transcription of stem cell and differentiated tissue markers  
550 followed by mitotic activity in tissues damaged by ionizing radiation. The molecular mechanism  
551 of this intriguing finding is still unclear, but it is possible that pDCS may affect cell fate  
552 regulators associated with the lineage progression of post-mitotic progenitors to increase cellular  
553 plasticity. Indeed, our finding showing overlapping expression of *agat-1* and *piwi-1* in post-



554 mitotic cells is consistent with recent findings demonstrating enhanced cellular plasticity by  
555 disturbing hippo and *egr-5* signaling pathways (de Sousa et al., 2018; Tu et al., 2015b).  
556 However, to our knowledge, there is no precedent in which a short electric stimulus can robustly  
557 coordinate genetic and cellular events toward stem cell reconstitution in tissues damaged by  
558 ionizing radiation. Future studies will be needed to understand the epistatic relationship between  
559 cell fate regulators and the identity of the cells expressing neoblast markers ectopically along  
560 with the long-term stability of the *piwi-1*<sup>+</sup> cells.

561  
562 One possible explanation driving the pDCS-mediated expression of stem cell markers is  
563 that distinctive post-mitotic progenitors can sense the electric stimulus and respond. Consistent  
564 with this idea, we propose post-mitotic lineages expressing L-type Ca<sub>v</sub> channels [i.e., neural,  
565 epidermal, parenchymal, protonephridia, and cathepsin<sup>+</sup> cells (Fincher et al., 2018; Plass et al.,  
566 2018)] are likely the targets of pDCS-enhanced plasticity (Fig. S6). Future experiments will  
567 address the individual contribution of post-mitotic lineages expressing L-type Ca<sub>v</sub> channels after  
568 pDCS. Another possible scenario may involve the presence of radio-resistant neoblasts or  
569 neoblasts with low cycling activity that are sensitive to the electric stimulus. Recent evidence  
570 supports the possibility of slow-cycling neoblasts with distinctive regenerative properties  
571 (Molinaro et al., 2021). The complete picture of the neoblast heterogeneity and their regulation is  
572 an evolving subject that is far from being understood (Fincher et al., 2018; Molinaro and  
573 Pearson, 2016; Plass et al., 2018; Reddien, 2018; Rink, 2018; van Wolfswinkel et al., 2014b;  
574 Wagner et al., 2011; Zeng et al., 2018b).

575

576 We propose a model whereby pDCS may lead to enhanced DNA repair followed by  
577 transcription. Our results implicate pDCS effects are mediated by increases in intracellular  $[Ca^{2+}]$   
578 concentration via L-type  $Ca_v$  channel and/or release from intracellular  $Ca^{2+}$  stores (Fig. 7A). The  
579 initial effects of pDCS stimulate transcription of IEGs that are tightly regulated by increases in  
580 intracellular  $[Ca^{2+}]$  concentration via L-type  $Ca_v$  channel and/or release from intracellular  $Ca^{2+}$   
581 stores (Fig. 7B). The increase in cytosolic  $[Ca^{+2}]$  may serve to boost DNA repair improving  
582 DNA integrity followed by the transcription of IEGs (Fig. 7B). The outcome of these  $Ca^{2+}$   
583 mediated events significantly reduce overall levels of DNA damage leading to transcription of  
584 stem cell-related genes and cell cycle re-entry in tissues damaged by ionizing radiation. Further  
585 experiments are needed to determine the order in which these events take place and to further  
586 define the identity of the cells expressing neoblast markers. It is unclear whether radio-resistant  
587 cells, slow-cycling neoblasts, or post-mitotic cells with enhanced plasticity are associated with  
588 pDCS-induced effects (Fig. 7C).

589

590

591

## 592 **Material and Methods**

593

### 594 **Planarian culture and maintenance**

595 For transplantation experiments, planarians were acclimatized to a final culturing  
596 temperature of 13°C. Acclimatization was gradual, beginning with an initial transfer to 16°C for  
597 approximately two weeks and then stepped to 13°C permanently until planarian were used for  
598 transplantation. Before each change in temperature, planarian cultures, destined for transfer,  
599 were fed before temperature changes. Animals transferred to 13°C incubators were cleaned once  
600 per day for the first four days of temperature acclimatization. All planarian maintenance was  
601 performed as previously described (Oviedo et al., 2008b). After the first four days, planarian  
602 maintenance was resumed as previously described (Oviedo et al., 2008b). Planarians were not  
603 used for tissue transplantation until they had been cultured for at least two weeks at 13°C.  
604 Reduced culturing temperatures were used to decrease the mobility of recovering planarian  
605 following tissue transplantation.

606

### 607 **Tissue Transplantations**

608 Planarians were transplanted as previously described (Guedelhofer and Sanchez  
609 Alvarado, 2012a; Guedelhofer and Sanchez Alvarado, 2012b) with minor changes to tools used  
610 for transplanting tissue. We developed a transplantation tool to facilitate consistency in the size  
611 of the graft and reduce tissue damage. Briefly, the transplantation tool was made from a 19-18 $\frac{1}{2}$   
612 gauge syringe that was bored out to an inner diameter of 750µm using a Dremel drill bit. The  
613 outer diameter was polished using 500-1000 grit wet sandpaper until the edges were paper thin  
614 and smooth to reduce drag during tissue insertion.

615 Transplantation schedules varied with respect to experimental condition (i.e. WT,  
616 irradiated, or RNAi tissues). Specifically, in experiments using irradiated planarian host or donor  
617 tissue, all irradiation was performed 24hours before tissue transplantation. For transplantation  
618 experiments using *piwi-1* RNAi tissues, transplantation was performed 48hrs post-final injection  
619 (5<sup>th</sup> injection) and subsequent pDCS experiments occurred 4 days post-transplantation.  
620 Additionally, in transplantation experiments using *piwi-1* RNAi planarian, all *piwi-1* RNAi  
621 donor tissue was derived from *piwi-1* RNAi hosts (i.e. *piwi-1* donor inserts were taken from the  
622 anterior region of intact *piwi-1* RNAi who were then used as hosts for wild-type donor tissues).

623

#### 624 **Planarian Immobilization**

625 Transplanted or intact planarians were placed in chilled 0.2% w/v chloretone solution for  
626 3-5 minutes (Guedelhofer and Sanchez Alvarado, 2012a; Guedelhofer and Sanchez Alvarado,  
627 2012b) in preparation for agar immobilization. After soaking, the planarians were rinsed in  
628 chilled planarian water. Motionless planarians were individually placed on large 75mm x 50mm  
629 glass slides roughly 1.0 cm apart, atop the ice. All remaining planarian water was removed, and  
630 planarian were subsequently covered in 1.0% low melting point agarose (1.0% w/v LMP agar,  
631 planarian water) (ThermoFisher 16520050), nearing room temperature, until the planarians were  
632 entirely submerged. Planarians were gently positioned to level during the gelation process to  
633 achieve maximum body axis symmetry. Once the agar is completely solidified, excess agar was  
634 trimmed and encapsulated planarians were placed into the center of chilled 35mm Petri dishes  
635 (Corning CLS430588), prefilled halfway with solidified 1.0% agarose (1.0% agar w/v, planarian  
636 water) (Sigma A9539). The remaining petri dish volume was filled with 1.0% agarose until the

637 agarose level is flush with the top of the encapsulated planarian. All agar encapsulation processes  
638 were performed on ice.

639

#### 640 **Administration of current and electric field generation for pDCS experiments**

641 Planarians were immobilized in agarose and subjected to applied currents via current  
642 clamped microelectrodes. To deliver the current, a power supply was fashioned using thirty 9V  
643 batteries in series sectioned in 45V increments; the power supply is fashioned with a 100K rotary  
644 potentiometer to adjust output to the desired voltage.

645 To deliver the current to the planarians, borosilicate sharp microelectrodes were pulled  
646 using the P-97 Flaming/Brown pipette puller (Sutter Instruments P-97). Microelectrodes were  
647 filled with 3M KCl and placed vertically in a 3M KCl bath with the pulled tip in solution. To  
648 deliver current to the planarians, microelectrodes were bridged with 6-8" long 1/32" I.D. PVC  
649 tubing filled with 3M KCl 1.0% agar connected to 3M KCl baths joined to the power supply via  
650 Pt electrodes. The current was clamped using an RNX 3/8 1GO 100M $\Omega$  resistor (Mouser RNX-  
651 3/8-100M) in series with the planarian.

652 For all pDCS experiments, the power supply output was 70V (7 $\mu$ A delivered to  
653 planarian) and immobilized planarian were impaled through their ventral epithelial layer, in the  
654 pre-pharyngeal region, proximal to the brain, and the tail tip, with each glass microelectrode. The  
655 duration of current administration ranged from minutes to hours depending on the needs of the  
656 experiment. The polarity of the electric field in this paper was positive pole in the anterior and  
657 negative to the posterior region of the animal.

658

#### 659 **Library Preparation and RNA Sequencing**

660 Planarians treated with pDCS and sham transplanted planarian tails were isolated, and RNA was  
661 extracted for each sample. pDCS and sham planarian for these experiments were planarians with  
662 wild-type donor tissue transplanted into 24 hours irradiated host tissue. Triplicated analysis was  
663 performed for each data point that consisted of pooled samples from four planarian tails per  
664 replicate. RNA libraries were prepared and sequenced on the Illumina HiSeq 4000 platform at  
665 the DNA Technologies Core at the UC Davis Genome Center. Samples were indexed and pooled  
666 for multiplexing. All samples were analyzed using a Bioanalyzer for quality control before  
667 sequencing.

668

#### 669 **RNA Isolation**

670 RNA from tissues was extracted as previously described (Oviedo et al., 2008c). Tail fragments  
671 from sham and pDCS animals were placed in Trizol immediately after amputation and RNA was  
672 extracted for each sample. Triplicated analysis was performed for each data point that consisted  
673 of pooled samples from four planarian tails per replicate.

674

#### 675 **Library Preparation and RNA Sequencing**

676 The cDNA sequencing libraries were prepared using an automated system at the UC Davis  
677 Technologies Core. All samples were accompanied with quality control (QC) documentation and  
678 profiled with Bioanalyzer for QC before sequencing. Poly-A enrichment was used to remove  
679 ribosomal RNA contamination and maximize mRNA detected. Samples were indexed and  
680 pooled for multiplexing. Using the Illumina HiSeq 4000 platform, paired-end reads were  
681 sequenced to a length of 200 bp by the DNA Technologies Core at the UC Davis Genome  
682 Center. This generated high-quality RNA-seq data for thorough downstream bioinformatic

683 analysis to detect delicate changes in phenotype. Paired-end sequencing was also used to resolve  
684 ambiguous differences with high repeat regions.

685

## 686 **Read Mapping and Gene Expression Analysis**

687 Trimmed fastq files were assessed for quality control and mapped to the recently  
688 published complete *Schmidtea mediterranea* genome dd\_Smes\_g4\_1 from the PlanMine  
689 database (Grohme et al., 2018). The Bioconductor package Rsubread version 2.4.2 (Liao et al.,  
690 2013) was used to map reads to the reference genome using a robust and efficient seed-and-vote  
691 algorithm followed by the featureCounts algorithm to assign counts. The raw counts' data were  
692 normalized and filtered for genes with log<sub>2</sub> counts-per-million (CPM) greater than 0.5  
693 (Supplemental file 4). The sample variation was assessed for quality. A customized pipeline  
694 using the limma package and voom transformation for precision weights was developed (Law et  
695 al., 2014; Phipson et al., 2016; Ritchie et al., 2015). Limma version 3.46.0 and edgeR version  
696 3.32.1 were used for the statistical analysis. Test statistics were produced using empirical Bayes  
697 moderation, and subsequent heatmaps were made using the ComplexHeatmap Bioconductor  
698 package. We separately tested the contrasts of gene expression in the 15-minute and 60-minute  
699 conditions against that in the sham control using a Benjamini-Hochberg False Discovery Rate of  
700 5%. All bioinformatic analyses were coded with R version 4.0.3 on macOS Big Sur 10.16 using  
701 the x86\_64-apple-darwin17.0 platform.

702

## 703 **Gene Set Enrichment Analysis**

704 Gene Set Enrichment Analysis was performed using the Bioconductor topGO package version  
705 2.42.0. (Alexa and Rahnenfuhrer, 2020; Alexa et al., 2006). Gene Ontology annotations for the

706 dd\_Smed\_v6 transcriptome were mined from the Planmine database and used to map pathway  
707 enrichment (Alexa and Rahnenfuhrer, 2020; Grohme et al., 2018). Gene rankings calculated by  
708 the Limma-voom pipeline were used for determining the significance and enrichment (Alexa et  
709 al., 2006; Law et al., 2014; Liu et al., 2015; Phipson et al., 2016; Ritchie et al., 2015; Smyth and  
710 Speed, 2003). Enrichment was computed by ranking gene scores using the conservative  
711 Kolmogorov-Smirnov (K-S) test. Pathways were considered enriched with a K-S  $p$ -value  $<0.05$ .  
712 A complete RMarkdown-based notebook of code to reproduce the transcriptomic and GSE  
713 Analysis is available in Supplementary Online Materials.

714

### 715 **Ca<sup>2+</sup> inhibition via Nicardipine, Nifedipine, and EGTA-AM**

716 Nicardipine and nifedipine inhibition was performed on transplanted planarian 3 days  
717 post-transplantation such that the 24hr incubation period concluded at 4 days post-  
718 transplantation. Each dihydropyridine was dissolved in 100% DMSO at a concentration of  
719 10mM and then diluted in 50mL of planarian water to a final working concentration of 5 $\mu$ M, as  
720 described previously (Nogi et al., 2009). EGTA-AM administration as achieved via posterior  
721 injections 1hr prior to pDCS delivery. Firstly, planarian volume was estimated using  $\frac{1}{2} \cdot$   
722  $(\frac{4}{3} \pi abc)$  where a, b, and c represent planarian length, width, and height. With estimated  
723 planarian volume, EGTA-AM was diluted in Milli-Q water and injected (37nL per injection  
724 pulse) such that the final EGTA concentration was 100 $\mu$ M.

725

### 726 **Tissue preparation for cryosections**

727 Planarian are fixed using NAC-formaldehyde based fixation as described previously  
728 (King and Newmark, 2013). Fixed animals were prepared for cryosectioning as previously



729 described (Reddien et al., 2005). Briefly, planarians were immersed in increasing concentrations  
730 of sucrose diluted in 1XPBS. 1XPBS was replaced with 15% sucrose solution for 1 hour and  
731 then 30% sucrose solution overnight at 4°C. Planarians were then placed in tissue embedding  
732 molds; 30% sucrose was removed and replaced with optimal cutting temperature (OCT)  
733 medium. Planarians were then situated to the desired position/orientation within the OCT and  
734 molds were quickly placed in cooling bins containing dry ice immersed in 2-methyl-1-butanol.  
735 Once frozen, samples were stored at -80°C until needed for sectioning. The tissue was sectioned  
736 in a Leica Cryostat CM1860. Sectioned tissue was either used immediately for FISH/IHC or  
737 stored long-term at -80°C until needed.

738

#### 739 **Fluorescent *in situ* hybridization (FISH) on sectioned tissue**

740 Cryo-section containing slides were removed from storage at -80°C and given 30min to  
741 reach room temperature. Clear scotch tape was placed over the frosted label to ensure label  
742 longevity and assist in coverslip placement during hybridization. Custom-made multi-slide  
743 chambers were developed and used throughout the procedure. Multi-slide chambers held 12  
744 slides and only required 16ml of the solution to reach maximal coverage. Standard Coplin Jars  
745 may be used but require more solution volume per slide contained. After slides reached room  
746 temperature, slides were placed in the chamber and rehydrated in 1XPBS for 15min (x2).  
747 Following rehydration, FISH was performed as described in (King and Newmark, 2013) with  
748 specific changes, as follows: proteinase K incubation was performed for 10min at room  
749 temperature at 1µg/mL PK concentration. 1:1 prehybridization/PBStx was omitted. For pre-  
750 hybridization and hybridization solution incubation, slides were removed from the chamber and  
751 placed in repurposed slide holding containers (converted to hybridization chambers using water-

752 saturated tissue paper placed in each column (x2)) 150 $\mu$ L of the solution was administered to  
753 slides, and then glass coverslips were placed atop slides to seal in solution, decreasing  
754 evaporation. At the end of the FISH procedure, DAPI (1:1000) was added to slides within the  
755 multi-slide chamber for 30min and washed (x2) with 1XPBS. Slides were mounted using the  
756 Gelvatol solution.

757

### 758 **Fixation of large planarian for in-situ hybridization**

759 All large planarian (8-12mm) used for whole-mount *in-situ* hybridization (WISH) were  
760 fixed using a modified NAC fixation protocol previously described (Guedelhofer and Sanchez  
761 Alvarado, 2012a). Changes for fixation were introduced as follows: planarian first underwent  
762 MgCl<sub>2</sub> tissue relaxation as described in (Forsthoefel et al., 2014). Briefly, planarians were placed  
763 in 0.66M MgCl<sub>2</sub> for 45-60s until planarian fully relaxed. The MgCl<sub>2</sub> solution was replaced with  
764 10% N-Acetyl cysteine for 10min at room temperature. Lastly, bleaching was performed with a  
765 modified bleaching solution (0.5% formamide, 0.36% H<sub>2</sub>O<sub>2</sub>, 0.05% Triton X-100, 1X PBS) and  
766 placed under light, overnight.

767

### 768 **Whole-mount in-situ hybridization (WISH)**

769 WISH was performed following a previous protocol (Guedelhofer and Sanchez  
770 Alvarado, 2012a). Minor modifications were made during proteinase K treatment, doubling the  
771 concentration to 2mg/mL, treating samples for 10min at room temperature.

772

### 773 **Whole-mount immunohistochemistry (IHC) and analysis**

774 Planarians were fixed for IHC following standard formaldehyde-based fixation with an  
775 added formamide based step as described previously (Guedelhofer and Sanchez Alvarado,  
776 2012a). Cells counted positive for Histone H3 phosphate signal (H3P) were normalized against  
777 the planarians surface area (mm<sup>2</sup>). When counting H3P in transplanted planarian, the anterior-  
778 posterior axis margin was shifted to the center of the transplant. Total H3P<sup>+</sup> cells were then  
779 counted in relation to the population of H3P<sup>+</sup> cells within the transplant. Briefly, total H3P<sup>+</sup> cells  
780 were counted in host tissue, specifically excluding cells within the transplanted tissue, to H3P<sup>+</sup>  
781 cells restricted in the anterior or posterior regions within sham and pDCS planarian  
782 independently (% cells outside transplant). Cell counting was performed using NIH ImageJ cell  
783 counter plugin, and all data analysis was performed in Prism.

784

#### 785 **Fixation and IHC on dissociated cells**

786 Planarian tail portions were separated and homogenized following pDCS. Homogenate  
787 was suspended in calcium and magnesium-free media (CMF) and placed on ice. Cell density was  
788 quantified using hemocytometers and cells were plated at 1million/cm<sup>2</sup> onto glass coverslips.  
789 Cells were given 1hour to adhere to the surface and were then fixed with Carnoy's solution for  
790 2hours on ice. IHC was performed using the human anti-RAD51 antibody and  $\gamma$ H2AX antibody  
791 as previously shown (Peiris et al., 2016b; Thiruvalluvan et al., 2018).

792

#### 793 **RNAi experiments**

794 RNAi was carried out via dsRNA micro-injection (Oviedo et al., 2008a). *piwi-1* and *nelfB*  
795 RNAi consisted of 3 consecutive injections followed by one weekly injection until animals were  
796 utilized for experimentation (14days post first injection). Injections were administered to the

797 prepharyngeal regions and, due to the size of the planarian (8-12mm), each planarian was given  
798 6-8 pulses of dsRNA 37nL each. *piwi-1* gene was selected and identified using the SmedGD  
799 database (Robb et al., 2015). dsRNA was synthesized in vitro as previously described (Oviedo et  
800 al., 2008a).

801

## 802 **Quantitative real-time PCR**

803 Quantitative real-time PCR was performed as described (Peiris et al., 2016b). The  
804 ubiquitously expressed gene H.55.12e was used as a reference control. Experiments were  
805 conducted in triplicates for each condition. Each qPCR experiment was conducted  
806 independently at least two times. All qPCR experiments used RNA extractions from tails of  
807 pDCS and sham transplanted planarian unless otherwise specified (i.e. qPCR for migratory  
808 related genes used tissue sections across the planarian as described in the text). Extracted RNA  
809 was then converted to cDNA using the Verso cDNA synthesis kit (ThermoFisher AB1453A).  
810 Gene expression is expressed in fold change in comparison to the given control condition.

811

## 812 **FACS Analysis and Comet assay**

813 FACS and comet analyses were performed as previously described (Peiris et al., 2016a;  
814 Peiris et al., 2016b).

815

## 816 **Imaging and data processing**

817 All images were captured using a Nikon AZ-100 multi zoom microscope equipped with  
818 NIS Elements AR 3.2 software. The brightness and contrast of digital images captured in NIS  
819 Elements software were further adjusted in Photoshop (Adobe). Area calculations and cellular

820 foci quantification were carried out using NIH ImageJ software. Mitotic counts were normalized  
821 against the planarians' surface area using ImageJ.

822

### 823 **Statistical Analysis**

824 Data are expressed as the mean  $\pm$  standard error of the mean (SEM) or fold change  $\pm$  SEM.

825 Statistical analysis was performed in Prism 2015 software, Graphpad Inc.

826

### 827 **Data Availability**

828 All raw and processed data files associated with this study have been deposited to the NCBI

829 Sequence Read Archive (SRA) submission number SUB8831617. The bioinformatic and RNA-

830 seq analyses pipeline with metadata files are found on the Github repository at:

831 <https://github.com/mlegro/RNA-seq-of-pDCS>.

832 **Acknowledgments:** We thank Edelweiss Pfister for lab managing and planarian maintenance,  
833 and members of the Oviedo lab for insightful discussions and comments on the manuscript. We  
834 are grateful to Ivy Pham for assistance with the planarian recovery experiments upon  
835 immobilization and Dr. Richard Nuccitelli for advice and critical reading of the manuscript. The  
836 sequencing was carried out by the DNA Technologies, and Expression Analysis Cores at the UC  
837 Davis Genome Center, supported by NIH shared instrumentation grant 1S10OD010786-01. We  
838 thank Monica Britton and Blythe Durbin-Johnson of the UC Davis Bioinformatics Core facility  
839 for advice with transcriptomic analysis. This work was supported by the National Science  
840 Foundation (NSF) graduate fellowship award 1744620 to EIM, and the University of California  
841 Cancer Research Coordinating Committee (Award# CRR-18-525108), and the National  
842 Institutes of Health (NIH) National Institute of General Medical Sciences (NIGMS) award  
843 R01GM132753 to N.J.O.

844

845 **Author contributions:** D.D., M.L., P.G.B., A.L.E., and N.J.O. Conceived, designed, and  
846 interpreted experiments. D.D., M.L., P.G.B., S.R., B.Z., E.M., D.A., and N.J.O., performed all  
847 experiments, acquired and analyzed data. D.D. and N.J.O. wrote the manuscript. All authors read  
848 the manuscript, provided comments, and approved the final version.

849

850 **Declaration of interests:** The authors declare no competing or financial interest.

851

852



## 854 REFERENCES

855

- 856 **Abnave, P., Aboukhatwa, E., Kosaka, N., Thompson, J., Hill, M. A. and Aboobaker, A. A.** (2017).  
857 Epithelial-mesenchymal transition transcription factors control pluripotent adult stem cell migration in vivo in  
858 planarians. *Development* **144**, 3440-3453.
- 859 **Adee, S.** (2018). Original Sin. *Bioelectricity* **1**, 10-11.
- 860 **Aleem, I. S., Aleem, I., Evaniew, N., Busse, J. W., Yaszemski, M., Agarwal, A., Einhorn, T. and**  
861 **Bhandari, M.** (2016). Efficacy of Electrical Stimulators for Bone Healing: A Meta-Analysis of Randomized Sham-  
862 Controlled Trials. *Scientific Reports* **6**, 31724.
- 863 **Alexa, A. and Rahnenfuhrer, J.** (2020). topGO: Enrichment Analysis for Gene Ontology. R package  
864 version 2.42.0.
- 865 **Alexa, A., Rahnenfuhrer, J. and Lengauer, T.** (2006). Improved scoring of functional groups from gene  
866 expression data by decorrelating GO graph structure. *Bioinformatics (Oxford, England)* **22**, 1600-7.
- 867 **Amir, R. E., Van den Veyver, I. B., Wan, M., Tran, C. Q., Francke, U. and Zoghbi, H. Y.** (1999). Rett  
868 syndrome is caused by mutations in X-linked MECP2, encoding methyl-CpG-binding protein 2. *Nat Genet* **23**, 185-  
869 8.
- 870 **Antal, A., Alekseichuk, I., Bikson, M., Brockmüller, J., Brunoni, A. R., Chen, R., Cohen, L. G.,**  
871 **Dowthwaite, G., Ellrich, J., Flöel, A. et al.** (2017). Low intensity transcranial electric stimulation: Safety, ethical,  
872 legal regulatory and application guidelines. *Clinical Neurophysiology* **128**, 1774-1809.
- 873 **Antal, A., Kriener, N., Lang, N., Boros, K. and Paulus, W.** (2011). Cathodal transcranial direct current  
874 stimulation of the visual cortex in the prophylactic treatment of migraine. *Cephalalgia* **31**, 820-8.
- 875 **Antal, A., Lang, N., Boros, K., Nitsche, M., Siebner, H. R. and Paulus, W.** (2008). Homeostatic  
876 metaplasticity of the motor cortex is altered during headache-free intervals in migraine with aura. *Cereb Cortex* **18**,  
877 2701-5.
- 878 **Bahrami, S. and Drablos, F.** (2016). Gene regulation in the immediate-early response process. *Adv Biol*  
879 *Regul* **62**, 37-49.
- 880 **Baker, S. A., Chen, L., Wilkins, A. D., Yu, P., Lichtarge, O. and Zoghbi, H. Y.** (2013). An AT-hook  
881 domain in MeCP2 determines the clinical course of Rett syndrome and related disorders. *Cell* **152**, 984-96.
- 882 **Bardeen, C. R. and Baetjer, F. H.** (1904). The inhibitive action of the Roentgen rays on regeneration in  
883 planarians. *J. Exp. Zool.* **1**, 191-195.
- 884 **Barghouth, P. G., Thiruvalluvan, M., LeGro, M. and Oviedo, N. J.** (2018). DNA damage and tissue  
885 repair: What we can learn from planaria. *Semin Cell Dev Biol.*
- 886 **Barghouth, P. G., Thiruvalluvan, M., LeGro, M. and Oviedo, N. J.** (2019). DNA damage and tissue  
887 repair: What we can learn from planaria. *Semin Cell Dev Biol* **87**, 145-159.
- 888 **Bewernick, B. H., Kayser, S., Sturm, V. and Schlaepfer, T. E.** (2012). Long-term effects of nucleus  
889 accumbens deep brain stimulation in treatment-resistant depression: evidence for sustained efficacy.  
890 *Neuropsychopharmacology* **37**, 1975-85.
- 891 **Bikson, M., Inoue, M., Akiyama, H., Deans, J. K., Fox, J. E., Miyakawa, H. and Jefferys, J. G.** (2004).  
892 Effects of uniform extracellular DC electric fields on excitability in rat hippocampal slices in vitro. *J Physiol* **557**,  
893 175-90.
- 894 **Boggio, P. S., Nunes, A., Rigonatti, S. P., Nitsche, M. A., Pascual-Leone, A. and Fregni, F.** (2007).  
895 Repeated sessions of noninvasive brain DC stimulation is associated with motor function improvement in stroke  
896 patients. *Restor Neurol Neurosci* **25**, 123-9.
- 897 **Boggio, P. S., Zaghi, S. and Fregni, F.** (2009). Modulation of emotions associated with images of human  
898 pain using anodal transcranial direct current stimulation (tDCS). *Neuropsychologia* **47**, 212-7.
- 899 **Boggio, P. S., Zaghi, S., Lopes, M. and Fregni, F.** (2008). Modulatory effects of anodal transcranial  
900 direct current stimulation on perception and pain thresholds in healthy volunteers. *Eur J Neurol* **15**, 1124-30.
- 901 **Bonar, N. A. and Petersen, C. P.** (2017). Integrin suppresses neurogenesis and regulates brain tissue  
902 assembly in planarian regeneration. *Development* **144**, 784-794.
- 903 **Bonner, W. M., Redon, C. E., Dickey, J. S., Nakamura, A. J., Sedelnikova, O. A., Solier, S. and**  
904 **Pommier, Y.** (2008). GammaH2AX and cancer. *Nat Rev Cancer* **8**, 957-67.



- 905 **Borckardt, J. J., Bikson, M., Frohman, H., Reeves, S. T., Datta, A., Bansal, V., Madan, A., Barth, K.**  
906 **and George, M. S.** (2012). A pilot study of the tolerability and effects of high-definition transcranial direct current  
907 stimulation (HD-tDCS) on pain perception. *J Pain* **13**, 112-20.
- 908 **Borgens, R. B., Blight, A. R. and McGinnis, M. E.** (1987). Behavioral recovery induced by applied  
909 electric fields after spinal cord hemisection in guinea pig. *Science* **238**, 366-9.
- 910 **Bresadola, M.** (1998). Medicine and science in the life of Luigi Galvani (1737-1798). *Brain Res Bull* **46**,  
911 367-80.
- 912 **Brighton, C. T.** (1981). Treatment of nonunion of the tibia with constant direct current (1980 Fitts Lecture,  
913 A.A.S.T.). *J Trauma* **21**, 189-95.
- 914 **Brighton, C. T., Black, J., Friedenber, Z. B., Esterhai, J. L., Day, L. J. and Connolly, J. F.** (1981). A  
915 multicenter study of the treatment of non-union with constant direct current. *J Bone Joint Surg Am* **63**, 2-13.
- 916 **Chahrouh, M., Jung, S. Y., Shaw, C., Zhou, X., Wong, S. T., Qin, J. and Zoghbi, H. Y.** (2008).  
917 MeCP2, a key contributor to neurological disease, activates and represses transcription. *Science* **320**, 1224-9.
- 918 **Chaieb, L., Saiote, C., Paulus, W. and Antal, A.** (2014). The Stimulated Brain. *PART II: IMPROVING*  
919 *FUNCTIONS IN THE TYPICAL BRAIN*, 181-205.
- 920 **Chan, J. D., Zhang, D., Liu, X., Zarowiecki, M., Berriman, M. and Marchant, J. S.** (2017). Utilizing  
921 the planarian voltage-gated ion channel transcriptome to resolve a role for a Ca(2+) channel in neuromuscular  
922 function and regeneration. *Biochim Biophys Acta Mol Cell Res* **1864**, 1036-1045.
- 923 **Chang, H. F., Lee, Y. S., Tang, T. K. and Cheng, J. Y.** (2016). Pulsed DC Electric Field-Induced  
924 Differentiation of Cortical Neural Precursor Cells. *PLoS One* **11**, e0158133.
- 925 **Chrisman, S. D., Waite, C. B., Scoville, A. G. and Carnell, L.** (2016). *C. elegans* Demonstrates Distinct  
926 Behaviors within a Fixed and Uniform Electric Field. *PLoS One* **11**, e0151320.
- 927 **Coates McCall, I., Lau, C., Minielly, N. and Illes, J.** (2019). Owning Ethical Innovation: Claims about  
928 Commercial Wearable Brain Technologies. *Neuron* **102**, 728-731.
- 929 **Cohen, S. and Greenberg, M. E.** (2008). Communication between the synapse and the nucleus in  
930 neuronal development, plasticity, and disease. *Annu Rev Cell Dev Biol* **24**, 183-209.
- 931 **Cote, L. E., Simental, E. and Reddien, P. W.** (2019). Muscle functions as a connective tissue and source  
932 of extracellular matrix in planarians. *Nature Communications* **10**, 1592.
- 933 **Cullingford, T. E., Markou, T., Fuller, S. J., Giraldo, A., Pikkarainen, S., Zoumpoulidou, G., Alsafi,**  
934 **A., Ekere, C., Kemp, T. J., Dennis, J. L. et al.** (2008). Temporal regulation of expression of immediate early and  
935 second phase transcripts by endothelin-1 in cardiomyocytes. *Genome Biology* **9**, R32.
- 936 **Davidian, D., Ziman, B., Escobar, A. L. and Oviedo, N. J.** (2020). Direct current electric stimulation  
937 alters the frequency and the distribution of mitotic cells in planarians. *Bioelectricity*.
- 938 **de Sousa, N., Rodríguez-Esteban, G., Rojo-Laguna, J., Saló, E. and Adell, T.** (2018). Hippo signaling  
939 controls cell cycle and restricts cell plasticity in planarians. *PLoS Biol* **16**.
- 940 **Delaloye, S. and Holtzheimer, P. E.** (2014). Deep brain stimulation in the treatment of depression.  
941 *Dialogues Clin Neurosci* **16**, 83-91.
- 942 **Dragunow, M. and Robertson, H. A.** (1987). Kindling stimulation induces c-fos protein(s) in granule  
943 cells of the rat dentate gyrus. *Nature* **329**, 441-2.
- 944 **Eisenhoffer, G. T., Kang, H. and Alvarado, A. S.** (2008a). Molecular Analysis of Stem Cells and Their  
945 Descendants during Cell Turnover and Regeneration in the Planarian *Schmidtea mediterranea*. *Cell Stem Cell* **3**,  
946 327-339.
- 947 **Eisenhoffer, G. T., Kang, H. and Sánchez Alvarado, A.** (2008b). Molecular analysis of stem cells and  
948 their descendants during cell turnover and regeneration in the planarian *Schmidtea mediterranea*. *Cell Stem Cell* **3**,  
949 327-39.
- 950 **Elliott, C., Vijayakumar, V., Zink, W. and Hansen, R.** (2007). National Instruments LabVIEW: A  
951 Programming Environment for Laboratory Automation and Measurement. *Journal of the Association for Laboratory*  
952 *Automation* **12**, 17-24.
- 953 **Elliott, P.** (2014). The Stimulated Brain. *PART I: THE BASIS*, 3-33.
- 954 **Feng, J. F., Liu, J., Zhang, L., Jiang, J. Y., Russell, M., Lyeth, B. G., Nolte, J. A. and Zhao, M.** (2017).  
955 Electrical Guidance of Human Stem Cells in the Rat Brain. *Stem Cell Reports* **9**, 177-189.
- 956 **Fincher, C. T., Wurtzel, O., de Hoog, T., Kravarik, K. M. and Reddien, P. W.** (2018). Cell type  
957 transcriptome atlas for the planarian *Schmidtea mediterranea*. *Science*.
- 958 **Formento, E., Minassian, K., Wagner, F., Mignardot, J. B., Le Goff-Mignardot, C. G., Rowald, A.,**  
959 **Bloch, J., Micera, S., Capogrosso, M. and Courtine, G.** (2018). Electrical spinal cord stimulation must preserve  
960 proprioception to enable locomotion in humans with spinal cord injury. *Nat Neurosci* **21**, 1728-1741.

- 961 **Forsthoefel, D. J., Waters, F. A. and Newmark, P. A.** (2014). Generation of cell type-specific  
962 monoclonal antibodies for the planarian and optimization of sample processing for immunolabeling. *BMC Dev Biol*  
963 **14**, 45.
- 964 **Gao, M., Wei, W., Li, M. M., Wu, Y. S., Ba, Z., Jin, K. X., Li, M. M., Liao, Y. Q., Adhikari, S.,**  
965 **Chong, Z. et al.** (2014). Ago2 facilitates Rad51 recruitment and DNA double-strand break repair by homologous  
966 recombination. *Cell Res* **24**, 532-41.
- 967 **Gerovasili, V., Stefanidis, K., Vitzilaios, K., Karatzanos, E., Politis, P., Koroneos, A., Chatzimichail,**  
968 **A., Routsis, C., Roussos, C. and Nanas, S.** (2009). Electrical muscle stimulation preserves the muscle mass of  
969 critically ill patients: a randomized study. *Crit Care* **13**, R161.
- 970 **Graham, D. M., Huang, L., Robinson, K. R. and Messerli, M. A.** (2013). Epidermal keratinocyte  
971 polarity and motility require Ca<sup>2+</sup>(+) influx through TRPV1. *J Cell Sci* **126**, 4602-13.
- 972 **Graupe, D., Khobragade, N., Tuninetti, D., Basu, I., Slaviv, K. V. and Verhagen Metman, L.** (2018).  
973 Who May Benefit From On-Demand Control of Deep Brain Stimulation? Noninvasive Evaluation of Parkinson  
974 Patients. *Neuromodulation*.
- 975 **Greenberg, M. E., Ziff, E. B. and Greene, L. A.** (1986). Stimulation of neuronal acetylcholine receptors  
976 induces rapid gene transcription. *Science* **234**, 80-3.
- 977 **Greer, P. L. and Greenberg, M. E.** (2008). From synapse to nucleus: calcium-dependent gene  
978 transcription in the control of synapse development and function. *Neuron* **59**, 846-60.
- 979 **Griffin, M. and Bayat, A.** (2011). Electrical stimulation in bone healing: critical analysis by evaluating  
980 levels of evidence. *Eplasty* **11**.
- 981 **Grohme, M. A., Schloissnig, S., Rozanski, A., Pippel, M., Young, G. R., Winkler, S., Brandl, H.,**  
982 **Henry, I., Dahl, A., Powell, S. et al.** (2018). The genome of *Schmidtea mediterranea* and the evolution of core  
983 cellular mechanisms. *Nature* **554**, 56-61.
- 984 **Guedelhofer, O. C. t. and Sanchez Alvarado, A.** (2012a). Amputation induces stem cell mobilization to  
985 sites of injury during planarian regeneration. *Development* **139**, 3510-20.
- 986 **Guedelhofer, O. C. t. and Sanchez Alvarado, A.** (2012b). Planarian immobilization, partial irradiation,  
987 and tissue transplantation. *J Vis Exp*.
- 988 **Guo, A., Song, B., Reid, B., Gu, Y., Forrester, J. V., Jahoda, C. A. and Zhao, M.** (2010). Effects of  
989 physiological electric fields on migration of human dermal fibroblasts. *J Invest Dermatol* **130**, 2320-7.
- 990 **Haaf, T., Raderschall, E., Reddy, G., Ward, D. C., Radding, C. M. and Golub, E. I.** (1999).  
991 Sequestration of Mammalian Rad51-Recombination Protein into Micronuclei. *The Journal of Cell Biology* **144**, 11-  
992 20.
- 993 **Hao, S., Tang, B., Wu, Z., Ure, K., Sun, Y., Tao, H., Gao, Y., Patel, A. J., Curry, D. J., Samaco, R. C.**  
994 **et al.** (2015). Forniceal deep brain stimulation rescues hippocampal memory in Rett syndrome mice. *Nature* **526**,  
995 430-4.
- 996 **Herschman, H. R.** (1991). Primary response genes induced by growth factors and tumor promoters. *Annu*  
997 *Rev Biochem* **60**, 281-319.
- 998 **Holtzheimer, P. E., Kelley, M. E., Gross, R. E., Filkowski, M. M., Garlow, S. J., Barrocas, A., Wint,**  
999 **D., Craighead, M. C., Kozarsky, J., Chismar, R. et al.** (2012). Subcallosal cingulate deep brain stimulation for  
1000 treatment-resistant unipolar and bipolar depression. *Arch Gen Psychiatry* **69**, 150-8.
- 1001 **Huang, Y., Li, Y., Chen, J., Zhou, H. and Tan, S.** (2015a). Electrical Stimulation Elicits Neural Stem  
1002 Cells Activation: New Perspectives in CNS Repair. *Front Hum Neurosci* **9**, 586.
- 1003 **Huang, Y., Li, Y., Chen, J., Zhou, H. and Tan, S.** (2015b). Electrical Stimulation Elicits Neural Stem  
1004 Cells Activation: New Perspectives in CNS Repair. *Frontiers in Human Neuroscience* **9**, 586.
- 1005 **Isolani, M. E., Abril, J. F., Salo, E., Deri, P., Bianucci, A. M. and Batistoni, R.** (2013). Planarians as a  
1006 model to assess in vivo the role of matrix metalloproteinase genes during homeostasis and regeneration. *PLoS One*  
1007 **8**, e55649.
- 1008 **Jaffe, L. F.** (1981a). Control of development by steady ionic currents. *Fed Proc* **40**, 125-7.
- 1009 **Jaffe, L. F.** (1981b). The role of ionic currents in establishing developmental pattern. *Philos Trans R Soc*  
1010 *Lond B Biol Sci* **295**, 553-66.
- 1011 **Johnson, B. S., Zhao, Y. T., Fasolino, M., Lamonica, J. M., Kim, Y. J., Georgakilas, G., Wood, K. H.,**  
1012 **Bu, D., Cui, Y., Goffin, D. et al.** (2017). Biotin tagging of MeCP2 in mice reveals contextual insights into the Rett  
1013 syndrome transcriptome. *Nat Med* **23**, 1203-1214.
- 1014 **Kadosh, R.** (2015). Modulating and enhancing cognition using brain stimulation: Science and fiction.  
1015 *Journal of Cognitive Psychology* **27**, 141-163.

- 1016 **Kadosh, R., Soskic, S., Iuculano, T., Kanai, R. and Walsh, V.** (2010). Modulating Neuronal Activity  
1017 Produces Specific and Long-Lasting Changes in Numerical Competence. *Current Biology* **20**, 2016-2020.
- 1018 **Kandel, E. R.** (2012). The molecular biology of memory: cAMP, PKA, CRE, CREB-1, CREB-2, and  
1019 CPEB. *Mol Brain* **5**, 14.
- 1020 **Kim, I. V., Duncan, E. M., Ross, E. J., Gorbovytska, V., Nowotarski, S. H., Elliott, S. A., Sanchez**  
1021 **Alvarado, A. and Kuhn, C. D.** (2019). Planarians recruit piRNAs for mRNA turnover in adult stem cells. *Genes*  
1022 *Dev* **33**, 1575-1590.
- 1023 **King, R. S. and Newmark, P. A.** (2013). In situ hybridization protocol for enhanced detection of gene  
1024 expression in the planarian *Schmidtea mediterranea*. *BMC Dev Biol* **13**, 8.
- 1025 **Kuzyk, P. R. and Schemitsch, E. H.** (2009). The science of electrical stimulation therapy for fracture  
1026 healing. *Indian Journal of Orthopaedics* **43**, 127-131.
- 1027 **Law, C. W., Chen, Y., Shi, W. and Smyth, G. K.** (2014). voom: Precision weights unlock linear model  
1028 analysis tools for RNA-seq read counts. *Genome Biology* **15**, R29.
- 1029 **Lei, K., Thi-Kim Vu, H., Mohan, R. D., McKinney, S. A., Seidel, C. W., Alexander, R., Gotting, K.,**  
1030 **Workman, J. L. and Sanchez Alvarado, A.** (2016). Egf Signaling Directs Neoblast Repopulation by Regulating  
1031 Asymmetric Cell Division in Planarians. *Dev Cell* **38**, 413-29.
- 1032 **Levin, M.** (2007). Large-scale biophysics: ion flows and regeneration. *Trends Cell Biol* **17**, 261-70.
- 1033 **Levin, M.** (2014). Molecular bioelectricity: how endogenous voltage potentials control cell behavior and  
1034 instruct pattern regulation in vivo. *Mol Biol Cell* **25**, 3835-50.
- 1035 **Liao, Y., Smyth, G. K. and Shi, W.** (2013). The Subread aligner: fast, accurate and scalable read mapping  
1036 by seed-and-vote. *Nucleic Acids Res* **41**, e108.
- 1037 **Liu, R., Holik, A. Z., Su, S., Jansz, N., Chen, K., Leong, H. S., Blewitt, M. E., Asselin-Labat, M. L.,**  
1038 **Smyth, G. K. and Ritchie, M. E.** (2015). Why weight? Modelling sample and observational level variability  
1039 improves power in RNA-seq analyses. *Nucleic Acids Res* **43**, e97.
- 1040 **Lu, H., Ash, R. T., He, L., Kee, S. E., Wang, W., Yu, D., Hao, S., Meng, X., Ure, K., Ito-Ishida, A. et**  
1041 **al.** (2016). Loss and Gain of MeCP2 Cause Similar Hippocampal Circuit Dysfunction that Is Rescued by Deep Brain  
1042 Stimulation in a Rett Syndrome Mouse Model. *Neuron* **91**, 739-747.
- 1043 **Ma, L. and Yan, X.** (2014). Examining the nonparametric effect of drivers' age in rear-end accidents  
1044 through an additive logistic regression model. *Accid Anal Prev* **67**, 129-36.
- 1045 **Marchant, J. S.** (2019). Ca(2+) Signaling and Regeneration. *Cold Spring Harb Perspect Biol*.
- 1046 **Marsh, G. and Beams, H. W.** (1952). Electrical control of morphogenesis in regenerating *Dugesia tigrina*.  
1047 I. Relation of axial polarity to field strength. *J Cell Physiol* **39**, 191-213.
- 1048 **Marti, T. M., Hefner, E., Feeney, L., Natale, V. and Cleaver, J. E.** (2006). H2AX phosphorylation  
1049 within the G1 phase after UV irradiation depends on nucleotide excision repair and not DNA double-strand breaks.  
1050 *Proc Natl Acad Sci U S A* **103**, 9891-6.
- 1051 **Mayberg, H. S., Lozano, A. M., Voon, V., McNeely, H. E., Seminowicz, D., Hamani, C., Schwab, J.**  
1052 **M. and Kennedy, S. H.** (2005). Deep brain stimulation for treatment-resistant depression. *Neuron* **45**, 651-60.
- 1053 **McCaig, C. D., Rajnicek, A. M., Song, B. and Zhao, M.** (2005). Controlling cell behavior electrically:  
1054 current views and future potential. *Physiol Rev* **85**, 943-78.
- 1055 **McLaughlin, K. A. and Levin, M.** (2018). Bioelectric signaling in regeneration: Mechanisms of ionic  
1056 controls of growth and form. *Dev Biol* **433**, 177-189.
- 1057 **Miocinovic, S., Somayajula, S., Chitnis, S. and Vitek, J. L.** (2013). History, applications, and  
1058 mechanisms of deep brain stimulation. *JAMA Neurol* **70**, 163-71.
- 1059 **Mohammed, A., Bayford, R. and Demosthenous, A.** (2018). Toward adaptive deep brain stimulation in  
1060 Parkinson's disease: a review. *Neurodegener Dis Manag* **8**, 115-136.
- 1061 **Molinaro, A. M., Lindsay-Mosher, N. and Pearson, B. J.** (2021). Identification of TOR-responsive slow-  
1062 cycling neoblasts in planarians. *EMBO Rep* **22**, e50292.
- 1063 **Molinaro, A. M. and Pearson, B. J.** (2016). In silico lineage tracing through single cell transcriptomics  
1064 identifies a neural stem cell population in planarians. *Genome Biol* **17**, 87.
- 1065 **Moreno-Duarte, I., Gebodh, N., Schestatsky, P., Guleyupoglu, B., Reato, D., Bikson, M. and Fregni,**  
1066 **F.** (2014). The Stimulated Brain. *PART I: THE BASIS*, 35-59.
- 1067 **Morgan, J. I. and Curran, T.** (1991). Stimulus-transcription coupling in the nervous system: involvement  
1068 of the inducible proto-oncogenes fos and jun. *Annu Rev Neurosci* **14**, 421-51.
- 1069 **Mylius, V., Borckardt, J. J. and Lefaucheur, J. P.** (2012). Noninvasive cortical modulation of  
1070 experimental pain. *Pain* **153**, 1350-63.

- 1071 **Nelson, J., McKinley, R. A., Phillips, C., McIntire, L., Goodyear, C., Kreiner, A. and Monforton, L.**  
1072 (2016). The Effects of Transcranial Direct Current Stimulation (tDCS) on Multitasking Throughput Capacity.  
1073 *Frontiers in Human Neuroscience* **10**, 589.
- 1074 **Newmark, P. and Sánchez Alvarado, A.** (2000). Bromodeoxyuridine specifically labels the regenerative  
1075 stem cells of planarians. *Dev. Biol.* **220**, 142-53.
- 1076 **Niemann, M., Schneider, G. H., Kuhn, A., Vajkoczy, P. and Faust, K.** (2017). Longevity of Implantable  
1077 Pulse Generators in Bilateral Deep Brain Stimulation for Movement Disorders. *Neuromodulation*.
- 1078 **Nogi, T., Zhang, D., Chan, J. D. and Marchant, J. S.** (2009). A novel biological activity of praziquantel  
1079 requiring voltage-operated Ca<sup>2+</sup> channel beta subunits: subversion of flatworm regenerative polarity. *PLoS Negl*  
1080 *Trop Dis* **3**, e464.
- 1081 **Nuccitelli, R.** (2003). A role for endogenous electric fields in wound healing. *Curr Top Dev Biol* **58**, 1-26.
- 1082 **Nuccitelli, R. and Jaffe, L. F.** (1974). Spontaneous current pulses through developing fucoid eggs. *Proc*  
1083 *Natl Acad Sci U S A* **71**, 4855-9.
- 1084 **Ogawa, N., Oku, H., Hashimoto, K. and Ishikawa, M.** (2006). A physical model for galvanotaxis of  
1085 Paramecium cell. *J Theor Biol* **242**, 314-28.
- 1086 **Organization, W. H.** (2018). Depression.
- 1087 **Oviedo, N. J., Nicolas, C., Adams, D. S. and Levin, M.** (2008a). Gene knockdown in planarians using  
1088 RNAi interference. *Cold Spring Harb Protocols* **3**, 902-906.
- 1089 **Oviedo, N. J., Nicolas, C. L., Adams, D. S. and Levin, M.** (2008b). Establishing and maintaining a  
1090 colony of planarians. *CSH Protoc* **2008**, pdb prot5053.
- 1091 **Oviedo, N. J., Pearson, B. J., Levin, M. and Sanchez Alvarado, A.** (2008c). Planarian PTEN homologs  
1092 regulate stem cells and regeneration through TOR signaling. *Disease Models and Mechanisms* **1**, 131-143.
- 1093 **Palakodeti, D., Smielewska, M., Lu, Y.-C., Yeo, G. W. and Graveley, B. R.** (2008a). The PIWI proteins  
1094 SMEDWI-2 and SMEDWI-3 are required for stem cell function and piRNA expression in planarians. *RNA (New*  
1095 *York, N.Y.)* **14**, 1174-1186.
- 1096 **Palakodeti, D., Smielewska, M., Lu, Y. C., Yeo, G. W. and Graveley, B. R.** (2008b). The PIWI proteins  
1097 SMEDWI-2 and SMEDWI-3 are required for stem cell function and piRNA expression in planarians. *RNA (New*  
1098 *York, N.Y.)* **14**, 1174-86.
- 1099 **Peiris, T. H., Garcia-Ojeda, M. E. and Oviedo, N. J.** (2016a). Alternative flow cytometry strategies to  
1100 analyze stem cells and cell death in planarians. *Regeneration (Oxf)* **3**, 123-35.
- 1101 **Peiris, T. H., Ramirez, D., Barghouth, P. G., Ofoha, U., Davidian, D., Weckerle, F. and Oviedo, N. J.**  
1102 (2016b). Regional signals in the planarian body guide stem cell fate in the presence of genomic instability.  
1103 *Development* **143**, 1697-709.
- 1104 **Pellettieri, J., Fitzgerald, P., Watanabe, S., Mancuso, J., Green, D. R. and Sanchez Alvarado, A.**  
1105 (2010). Cell death and tissue remodeling in planarian regeneration. *Dev Biol* **338**, 76-85.
- 1106 **Phipson, B., Lee, S., Majewski, I. J., Alexander, W. S. and Smyth, G. K.** (2016). Robust  
1107 Hyperparameter Estimation Protects against Hypervariable Genes and Improves Power to Detect Differential  
1108 Expression. *Ann Appl Stat* **10**, 946-963.
- 1109 **Plass, M., Solana, J., Wolf, A. F., Ayoub, S., Misios, A., Glažar, P., Obermayer, B., Theis, F. J.,**  
1110 **Kocks, C. and Rajewsky, N.** (2018). Cell type atlas and lineage tree of a whole complex animal by single-cell  
1111 transcriptomics. *Science*.
- 1112 **Pohodich, A. E., Yalamanchili, H., Raman, A. T., Wan, Y. W., Gundry, M., Hao, S., Jin, H., Tang, J.,**  
1113 **Liu, Z. and Zoghbi, H. Y.** (2018). Forniceal deep brain stimulation induces gene expression and splicing changes  
1114 that promote neurogenesis and plasticity. *Elife* **7**.
- 1115 **Qi, Y., Zhang, Y., Baller, J. A. and Voytas, D. F.** (2016). Histone H2AX and the small RNA pathway  
1116 modulate both non-homologous end-joining and homologous recombination in plants. *Mutat Res* **783**, 9-14.
- 1117 **Reddien, P. W.** (2018). The Cellular and Molecular Basis for Planarian Regeneration. *Cell* **175**, 327-345.
- 1118 **Reddien, P. W., Oviedo, N. J., Jennings, J. R., Jenkin, J. C. and Sánchez Alvarado, A.** (2005).  
1119 SMEDWI-2 is a PIWI-like protein that regulates planarian stem cells. *Science* **310**, 1327-1330.
- 1120 **Rink, J. C.** (2018). Stem Cells, Patterning and Regeneration in Planarians: Self-Organization at the  
1121 Organismal Scale. *Methods Mol Biol* **1774**, 57-172.
- 1122 **Ritchie, M. E., Phipson, B., Wu, D., Hu, Y., Law, C. W., Shi, W. and Smyth, G. K.** (2015). limma  
1123 powers differential expression analyses for RNA-sequencing and microarray studies. *Nucleic Acids Res* **43**, e47.
- 1124 **Robb, S. M., Gotting, K., Ross, E. and Sanchez Alvarado, A.** (2015). SmedGD 2.0: The Schmidtea  
1125 mediterranea genome database. *Genesis* **53**, 535-46.



- 1126 **Saha, R. N. and Dudek, S. M.** (2013). Splitting hares and tortoises: a classification of neuronal immediate  
1127 early gene transcription based on poised RNA polymerase II. *Neuroscience* **247**, 175-81.
- 1128 **Saha, R. N., Wissink, E. M., Bailey, E. R., Zhao, M., Fargo, D. C., Hwang, J. Y., Daigle, K. R., Fenn,  
1129 J. D., Adelman, K. and Dudek, S. M.** (2011). Rapid activity-induced transcription of Arc and other IEGs relies on  
1130 poised RNA polymerase II. *Nat Neurosci* **14**, 848-56.
- 1131 **Salo, E. and Baguna, J.** (1985). Cell movement in intact and regenerating planarians. Quantitation using  
1132 chromosomal, nuclear and cytoplasmic markers. *J Embryol Exp Morphol* **89**, 57-70.
- 1133 **Sandmann, T., Vogg, M. C., Owlarn, S., Boutros, M. and Bartscherer, K.** (2011). The head-  
1134 regeneration transcriptome of the planarian *Schmidtea mediterranea*. *Genome Biology* **12**, R76.
- 1135 **Sarkar, A. and Kadosh, R.** (2016). Development of Mathematical Cognition. *Part I: Neural substrates*,  
1136 245-296.
- 1137 **Scimone, M. L., Atabay, K. D., Fincher, C. T., Bonneau, A. R., Li, D. J. and Reddien, P. W.** (2020).  
1138 Muscle and neuronal guidepost-like cells facilitate planarian visual system regeneration. *Science* **368**.
- 1139 **Scimone, M. L., Cote, L. E. and Reddien, P. W.** (2017). Orthogonal muscle fibres have different  
1140 instructive roles in planarian regeneration. *Nature* **551**, 623-628.
- 1141 **Seebeck, F., Marz, M., Meyer, A. W., Reuter, H., Vogg, M. C., Stehling, M., Mildner, K., Zeuschner,  
1142 D., Rabert, F. and Bartscherer, K.** (2017). Integrins are required for tissue organization and restriction of  
1143 neurogenesis in regenerating planarians. *Development* **144**, 795-807.
- 1144 **Smyth, G. K. and Speed, T.** (2003). Normalization of cDNA microarray data. *Methods* **31**, 265-73.
- 1145 **Snowball, A., Tachtsidis, I., Popescu, T., Thompson, J., Delazer, M., Zamarian, L., Zhu, T. and  
1146 Cohen Kadosh, R.** (2013). Long-Term Enhancement of Brain Function and Cognition Using Cognitive Training  
1147 and Brain Stimulation. *Current Biology* **23**, 987-992.
- 1148 **Stump, R. F. and Robinson, K. R.** (1983). *Xenopus* neural crest cell migration in an applied electrical  
1149 field. *J Cell Biol* **97**, 1226-33.
- 1150 **Sugino, K., Hempel, C. M., Okaty, B. W., Arnson, H. A., Kato, S., Dani, V. S. and Nelson, S. B.**  
1151 (2014). Cell-type-specific repression by methyl-CpG-binding protein 2 is biased toward long genes. *J Neurosci* **34**,  
1152 12877-83.
- 1153 **Thiruvalluvan, M., Barghouth, P. G., Tsur, A., Broday, L. and Oviedo, N. J.** (2018). SUMOylation  
1154 controls stem cell proliferation and regional cell death through Hedgehog signaling in planarians. *Cell Mol Life Sci*  
1155 **75**, 1285-1301.
- 1156 **Tortella, G., Casati, R., Aparicio, L. V., Mantovani, A., Senco, N., D'Urso, G., Brunelin, J., Guarienti,  
1157 F., Selingardi, P. M., Muszkat, D. et al.** (2015). Transcranial direct current stimulation in psychiatric disorders.  
1158 *World J Psychiatry* **5**, 88-102.
- 1159 **Tu, K. C., Cheng, L.-C., T K Vu, H., Lange, J. J., McKinney, S. A., Seidel, C. W. and Sánchez  
1160 Alvarado, A.** (2015a). Egr-5 is a post-mitotic regulator of planarian epidermal differentiation. *eLife* **4**, e10501.
- 1161 **Tu, K. C., Cheng, L. C., H, T. K. V., Lange, J. J., McKinney, S. A., Seidel, C. W. and Sanchez  
1162 Alvarado, A.** (2015b). Egr-5 is a post-mitotic regulator of planarian epidermal differentiation. *Elife* **4**, e10501.
- 1163 **Tullai, J. W., Schaffer, M. E., Mullenbrock, S., Sholder, G., Kasif, S. and Cooper, G. M.** (2007).  
1164 Immediate-early and delayed primary response genes are distinct in function and genomic architecture. *J Biol Chem*  
1165 **282**, 23981-95.
- 1166 **Uhlitz, F., Sieber, A., Wyler, E., Fritsche-Guenther, R., Meisig, J., Landthaler, M., Klinger, B. and  
1167 Bluthgen, N.** (2017). An immediate-late gene expression module decodes ERK signal duration. *Mol Syst Biol* **13**,  
1168 928.
- 1169 **van Wolfswinkel, J. C., Wagner, D. E. and Reddien, P. W.** (2014a). Single-cell analysis reveals  
1170 functionally distinct classes within the planarian stem cell compartment. *Cell Stem Cell* **15**, 326-339.
- 1171 **van Wolfswinkel, J. C., Wagner, D. E. and Reddien, P. W.** (2014b). Single-cell analysis reveals  
1172 functionally distinct classes within the planarian stem cell compartment. *Cell Stem Cell* **15**, 326-39.
- 1173 **Velarde, O. M., Mato, G. and Dellavale, D.** (2017). Mechanisms for pattern specificity of deep-brain  
1174 stimulation in Parkinson's disease. *PLoS One* **12**, e0182884.
- 1175 **Wagner, D. E., Ho, J. J. and Reddien, P. W.** (2012). Genetic regulators of a pluripotent adult stem cell  
1176 system in planarians identified by RNAi and clonal analysis. *Cell Stem Cell* **10**, 299-311.
- 1177 **Wagner, D. E., Wang, I. E. and Reddien, P. W.** (2011). Clonogenic neoblasts are pluripotent adult stem  
1178 cells that underlie planarian regeneration. *Science* **332**, 811-6.
- 1179 **Wagner, F. B., Mignardot, J. B., Le Goff-Mignardot, C. G., Demesmaeker, R., Komi, S., Capogrosso,  
1180 M., Rowald, A., Seanez, I., Caban, M., Pirondini, E. et al.** (2018). Targeted neurotechnology restores walking in  
1181 humans with spinal cord injury. *Nature* **563**, 65-71.

1182           **Wei, W., Ba, Z., Gao, M., Wu, Y., Ma, Y., Amiard, S., White, C. I., Rendtlew Danielsen, J. M., Yang,**  
1183 **Y. G. and Qi, Y.** (2012). A role for small RNAs in DNA double-strand break repair. *Cell* **149**, 101-12.  
1184           **West, A. E. and Greenberg, M. E.** (2011). Neuronal activity-regulated gene transcription in synapse  
1185 development and cognitive function. *Cold Spring Harb Perspect Biol* **3**.  
1186           **Wexler, A. and Reiner, P. B.** (2019). Oversight of direct-to-consumer neurotechnologies. *Science* **363**,  
1187 234-235.  
1188           **Wurzman, R., Hamilton, R. H., Pascual-Leone, A. and Fox, M. D.** (2016). An open letter concerning  
1189 do-it-yourself users of transcranial direct current stimulation. *Ann Neurol* **80**, 1-4.  
1190           **Yan, X., Liu, J., Huang, J., Huang, M., He, F., Ye, Z., Xiao, W., Hu, X. and Luo, Z.** (2014). Electrical  
1191 stimulation induces calcium-dependent neurite outgrowth and immediate early genes expressions of dorsal root  
1192 ganglion neurons. *Neurochem Res* **39**, 129-41.  
1193           **Zeng, A., Li, H., Guo, L., Gao, X., McKinney, S., Wang, Y., Yu, Z., Park, J., Semerad, C., Ross, E. et**  
1194 **al.** (2018a). Prospectively Isolated Tetraspanin + Neoblasts Are Adult Pluripotent Stem Cells Underlying Planaria  
1195 Regeneration. *Cell* **173**, 1593-1608.e20.  
1196           **Zeng, A., Li, H., Guo, L., Gao, X., McKinney, S., Wang, Y., Yu, Z., Park, J., Semerad, C., Ross, E. et**  
1197 **al.** (2018b). Prospectively Isolated Tetraspanin(+) Neoblasts Are Adult Pluripotent Stem Cells Underlying Planaria  
1198 Regeneration. *Cell* **173**, 1593-1608 e20.  
1199           **Zhao, M., Song, B., Pu, J., Wada, T., Reid, B., Tai, G., Wang, F., Guo, A., Walczysko, P., Gu, Y. et al.**  
1200 (2006). Electrical signals control wound healing through phosphatidylinositol-3-OH kinase-gamma and PTEN.  
1201 *Nature* **442**, 457-60.  
1202           **Zhu, S. J. and Pearson, B. J.** (2016). (Neo)blast from the past: new insights into planarian stem cell  
1203 lineages. *Curr Opin Genet Dev* **40**, 74-80.  
1204           **Zhuang, H., Wang, W., Seldes, R. M., Tahernia, A. D., Fan, H. and Brighton, C. T.** (1997). Electrical  
1205 stimulation induces the level of TGF-beta1 mRNA in osteoblastic cells by a mechanism involving  
1206 calcium/calmodulin pathway. *Biochem Biophys Res Commun* **237**, 225-9.  
1207

1208

1209 **Figure Legends**

1210 **Fig. 1. Schematic summary of planarian immobilization and pDCS setup.** (A), Schematic  
1211 representation of planarian immobilization. (B), Illustration of current-clamp circuit created by  
1212 pDCS electrodes and planarian. (C), Amplified schematic representation of planarian tissues  
1213 showing electrode placement and op-amps used to quantify current passing through the 100M $\Omega$   
1214 current clamp.

1215

1216 **Fig. 2. pDCS triggers a transcriptional response and cell cycle in  $\gamma$ -irradiated host tissues.**

1217 (A) Whole-mount *in situ* hybridization (WISH) showing *piwi-1*<sup>+</sup> signal in both wild-type (WT)  
1218 and  $\gamma$ -irradiated ( $\gamma$ -irr, 60Gy) planarian (n=10/10). (B) Schematic depicting transplantation  
1219 procedure using WT donor and irradiated host planarian with subsequent exposure to DCS. (C)  
1220 WISH of *piwi-1* gene expression after four days post-transplant in both sham (control, n=10/10)  
1221 and animals subjected to 60min pDCS (n=12/15). The insets in the lower portion of the image  
1222 represent magnification of the distal part of the animal –tail-, *piwi-1* signal is indicated with  
1223 arrows in animals subjected to pDCS. (D) *piwi-1* gene expression levels as determined by qPCR  
1224 (pool of six animals/replicate and three biological replicates). (E-F) RNA-seq data collected from  
1225 the host-tail tissue of sham and animals subjected to 60 mins pDCS (data was collected by  
1226 pooling tails from four independently treated pDCS or sham planaria across three independent  
1227 experimental trials). Gene expression heatmaps display differentially expressed transcripts  
1228 (FDR<0.05) as averaged log<sub>2</sub>CPM Z-scores. (E) Heatmap representation of RNA-seq data  
1229 displays differentially expressed neoblast subclass populations using the classical neoblast  
1230 classification from van Wolfswinkel et al., 2014b; Wagner et al., 2012. (F) RNA-seq heatmap  
1231 displays the neoblast subpopulations and their respective lineages based on recent neoblast

1232 classification (Zeng et al., 2018b). (G) *cyclin-B* gene expression levels obtained with qPCR from  
1233 tail fragments in both the sham and 60min pDCS (pool of six animals/replicate and three  
1234 biological replicates). (H) RNA-seq heatmap displaying differentially expressed genes  
1235 commonly associated with cell cycle regulation. (I) Whole-mount immunostaining with anti-H3P  
1236 antibody (green dots) showing H3P<sup>+</sup> cells inside and outside of the transplant. Notice H3P<sup>+</sup> cells  
1237 in the experimental group far away from the transplanted tissue (white arrows) following 6hrs  
1238 pDCS compared to sham control (n=10/15). Dotted yellow circle: transplanted tissue (J)  
1239 Magnified images around the transplanted tissue for both sham and pDCS after 6 hours of  
1240 treatment (red and yellow arrows indicate mitotic cells in the anterior and posterior to the  
1241 transplant -pink dotted line). (K) Average of H3P<sup>+</sup> cells in sham and the experimental groups  
1242 after 6 hours of pDCS. pDCS experiments were executed with positive pole to the anterior and  
1243 negative to the posterior for 60 minutes. Data represented as mean ± SEM. Students *t*-test: \*\*\*\**P*  
1244 ≤ 0.0001. Scale bars, 500μm.

1245

1246 **Fig. 3. Lethally irradiated host tissue is the main source of pDCS-induced neoblast**  
1247 **transcription** (A) Schematic representation depicting different regions of planarians subjected to  
1248 tissue transplants from wild-type animals. (B-C) Gene expression levels of genes associated with  
1249 cellular migration in planarians (*Snail-1*, *Snail-2*, *Zeb-1*, *β1-integrin*). The tissues used for each  
1250 experiment were trunk (B) and tail (C) from the sham and pDCS-treated for 60 mins and the  
1251 gene expression was measured with qPCR. (D, F, H) Depicts experimental design transplanting  
1252 tissue from different donors and hosts to which tail fragments were processed to measure gene-  
1253 level expression after four days of transplant. (D) *piwi-1(RNAi)* tissue into a lethally irradiated  
1254 host, (F) transplant WT tissue into a *piwi-1(RNAi)* host, and (H) transplant γ-irr tissue into a γ-irr



1255 host. (E, G, I) levels of gene expression from tissues obtained from sham and planarian subjected  
1256 to 60 mins pDCS. The gene expression levels involved markers for diverse neoblast populations  
1257 (*piwi-1*, *soxP-2*, *fgfr-1*, *egr-1*, *hnf-4*, *nkx2.2*, and *inx-13*. Pan neoblast (pNb), clonogenic neoblast  
1258 (cNb), neoblast (Nb). Data represented as mean  $\pm$  SEM. All gene expression experiments were  
1259 obtained from three biological replicates consisting of four-pooled samples per replicate. The  
1260 polarity of the electric field was positive pole to the anterior and negative to the posterior for 60  
1261 minutes. Statistical significance: multiple comparison one-way ANOVA: \* $P \leq 0.05$ , \*\* $P \leq 0.01$ ,  
1262 \*\*\* $P \leq 0.001$ , \*\*\*\* $P \leq 0.0001$ .

1263  
1264 **Fig. 4. pDCS enhances DNA damage response, reestablish DNA integrity and decreases cell**  
1265 **death within  $\gamma$ -irradiated tissues.** (A, B) Dissociated cells isolated from tail fragments were  
1266 immunostained with anti- $\gamma$ H2AX and anti-RAD51 to visualize nuclear (DAPI) vs. cytoplasmic  
1267 localization in sham and animals subjected to 60min pDCS. Nuclear  $\gamma$ H2AX includes four  
1268 classes of the nuclear signal as displayed in the left of (A) and previously described (Barghouth  
1269 et al., 2018; Thiruvalluvan et al., 2018). The RAD51 signal was classified based on their  
1270 localization with respect to DAPI as shown in in the left side of (B). Single-cell extract staining,  
1271 experiments consisted of five pooled tail fragments and three biological replicates. (C) DNA  
1272 integrity was measured with the COMET assay (mean tail length) using cells isolated from the  
1273 host tail fragment in sham and worms subjected to 60min pDCS (n=12 each). (D,E,H) RNA-seq  
1274 data obtained from tail fragments of sham and 60min pDCS tissue explants (data was collected  
1275 by pooling tails from four independently treated pDCS or sham planaria across three independent  
1276 experimental trials). Gene expression heatmaps display differentially expressed transcripts  
1277 (FDR<0.05) as averaged  $\log_2$ CPM Z-scores for putative DNA damage regulators (D), DNA

1278 repair regulators (E), and cell death regulators (H). (F) FACS analysis showing the distribution  
1279 of live, pre-apoptotic, apoptotic, and necrotic cells using Annexin V in sham and 60min pDCS.  
1280 The data includes four pooled tail fragments and three biological replicates. (G) Single-cell  
1281 immunostaining using anti-caspase-3<sup>+</sup> to denote three possible staining (active, pro-caspase and  
1282 no caspase images on the left side of (H)). Caspase immunostaining was obtained from five  
1283 pooled tail fragments and three biological replicates. Data represented as mean ± SEM obtained  
1284 from experiments independently repeated at least three times. The polarity of the electric field  
1285 was positive pole to the anterior and negative to the posterior for 60 minutes. Statistical  
1286 significance: (A-C) Students *t*-test; (F,G) multiple comparison one-way ANOVA: \**P* ≤ 0.05,  
1287 \*\**P* ≤ 0.01, \*\*\*\**P* ≤ 0.0001.

1288

1289 **Fig. 5. pDCS induces a rapid transcriptional response.** (A, B) *piwi-1* gene expression with  
1290 (A) whole-mount *in situ* hybridization and (B) qPCR at 15, 30, and 45 min of pDCS compared to  
1291 the sham group. (A) lower-left corner shows the body image of lethally irradiated (60 Gy)  
1292 animals four days post-transplant tissue from wildtype. The inset denotes the amplified tail  
1293 section (sham = 10/10, 15min pDCS = 8/10, 30min pDCS = 9/13, 45min pDCS = 10/14). qPCR  
1294 data represented as mean ± SEM obtained from triplicates consisting of five pooled samples per  
1295 experiment and repeated two times. (C) Gene expression heatmap of neoblast markers from tail  
1296 tissues explants, measured by qPCR. Shown are log<sub>2</sub>FC with column scaled Z-score (data is from  
1297 six pooled tail fragments/replicates and three biological replicates). (D-F) RNA-seq data  
1298 collected from tail tissue explants of irradiated and control animals (data was collected by  
1299 pooling tails from four independently treated pDCS or sham planaria across three independent  
1300 experimental trials) exposed to 60 min of pDCS. Gene expression heatmaps display differentially

1301 expressed transcripts (FDR<0.05) as averaged log<sub>2</sub>CPM Z-scores. (D) differentially expressed  
1302 classic neoblast subclass populations based on reference (van Wolfswinkel et al., 2014b; Wagner  
1303 et al., 2012). (E) differentially expressed neoblast subpopulations and their respective lineages  
1304 based on reference (Zeng et al., 2018b). differentially expressed immediate-early gene putative  
1305 homologs. The polarity of the electric field is denoted with a positive pole to the anterior and  
1306 negative to the posterior for 60 minutes. Statistical significance: multiple comparison one-way  
1307 ANOVA: \*\*\*\* $P \leq 0.0001$ . Scale bars, 500 $\mu$ m.

1308

1309 **Fig. 6. Ca<sup>2+</sup> signaling mediates pDCS-induced ectopic expression of *piwi-1*.** (A) Double  
1310 fluorescent *in situ* hybridizations (FISH) were performed on sagittal cross-sections of sham and  
1311 experimental group (n=six each). (B) Venn diagrams show percentage of *agat-1*<sup>+</sup> cell population  
1312 expressing *piwi-1*<sup>+</sup> (left) or *piwi-1*<sup>+</sup> cells expressing *agat-1*<sup>+</sup> (right). (C) The average number of  
1313 *piwi-1*<sup>+</sup> and *agat-1*<sup>+</sup>. (D, E) Double FISH performed on sagittal cross-sections following 24hr  
1314 soak with 5 $\mu$ M nifedipine or 60min incubation with 100 $\mu$ M EGTA [final concentration] (n=six  
1315 each). (F-G) Venn diagrams show percentage of *agat-1*<sup>+</sup> cell population expressing *piwi-1*<sup>+</sup> (left)  
1316 or *piwi-1*<sup>+</sup> cells expressing *agat-1*<sup>+</sup> (right) planarian exposed to 5 $\mu$ M nifedipine or 100 $\mu$ M  
1317 EGTA. (J) Bar graph displays the average number of *piwi-1*<sup>+</sup> and *agat-1*<sup>+</sup> within each inhibition  
1318 group. (K-L) Gene expression levels of neoblast markers *piwi-1*, *soxP2*, *fgfr1*, *egr1*, *hnf4*, *nkx2.2*,  
1319 *and inx-13* using qPCR following 24hr 5 $\mu$ M nifedipine soak and 100  $\mu$ M EGTA (data is from  
1320 five pooled tail fragments/replicates and three biological replicates). All cases involve isolated  
1321 tail tissue and pDCS for 15 min in the experimental group. Data represented as mean  $\pm$  SEM.  
1322 Pan neoblast (pNb), clonogenic neoblast (cNb), neoblast (Nb). The polarity of the electric field is  
1323 denoted with a positive pole to the anterior and negative to the posterior for 60 minutes.

1324 Statistical significance: (C) Students *t*-test; (F) Kolmogorov-Smirnov test,  $KS < 0.05$  (I, K-L)  
1325 multiple comparison one-way ANOVA:  $**P \leq 0.01$ ,  $***P \leq 0.001$ ,  $****P \leq 0.0001$ . Scale bars,  
1326 100 $\mu$ m.

1327

1328 **Fig. 7. Schematic summary of pDCS-induced effects.** (A) pDCS-mediated effects in lethally  $\gamma$ -  
1329 irradiated host tissue (gray cells) require engrafted neoblasts (colored cells, gray arrows). (B)  
1330 Proposed cellular effects responsible for observed pDCS-induced transcriptional activation.  
1331 Transcription sensitive to (1)  $Ca^{2+}$  influx through L-type  $Ca_v$  and subsequent (2)  $Ca^{2+}$  release  
1332 from intracellular stores (i.e., endoplasmic reticulum) leading to (3)  $Ca^{2+}$ -mediated transcription  
1333 and (4) expression of pDCS-induced genes. The ectopic overlapping expression of *agat-1*<sup>+</sup>  
1334 populations with *piwi-1* suggests enhanced plasticity of transcriptional programs within the  
1335 lethally  $\gamma$ -irradiated host tissue. ER=Endoplasmic Reticulum. (C) pDCS activates rapid  
1336 transcription of genes associated with neoblast populations in lethally  $\gamma$ -irradiated host tissue.

1337

1338 **Supplemental Information**

1339 **Fig. S1. pDCS effects on mitotic activity and transcriptional response in tail transplanted**  
1340 **tissues.** (A) Immunostaining with anti-H3P antibody (green dots) representing three scenarios  
1341 where pDCS was able to induce low or no change, moderate and robust number of mitotic cells  
1342 exiting the transplant after 6hrs pDCS. Number of animals for each condition are included at the  
1343 bottom of each image. (B) Illustration of current-clamp circuit created by pDCS electrodes and  
1344 posterior transplanted planarian. (C) WISH addressing *piwi-1* gene expression of 60-minute  
1345 pDCS. Tissue transplants involved transplant from WT into a  $\gamma$ -irr (60 Gy) host. Scale bars,  
1346 500 $\mu$ m.

1347  
1348 **Fig. S2. pDCS treatment amplifies DNA replication regulators.** Heatmap showing  
1349 significantly differentially expressed transcripts involved in DNA replication. RNA-seq data  
1350 collected from tail tissue explants of sham and exposed to 60 min of pDCS (data was collected  
1351 by pooling tails from four independently treated pDCS or sham planaria across three independent  
1352 experimental trials). Tissue transplants involved transplant from WT into a  $\gamma$ -irr (60 Gy) host.  
1353 Gene expression heatmaps display differentially expressed transcripts (FDR<0.05) as averaged  
1354  $\log_2$ CPM Z-scores.

1355  
1356 **Fig. S3. pDCS treatment increases the transcriptional activity of DNA repair, damage, and**  
1357 **replication pathways.** (A) Heatmaps showing significantly differentially expressed transcripts  
1358 involved in DNA repair, (B) DNA damage, and, (C) DNA replication. RNA-seq data collected  
1359 from tail tissue explants of sham and exposed to 60 min of pDCS (data was collected by pooling  
1360 tails from 4 independently treated pDCS or sham planaria across 3 independent experimental

1361 trials). Tissue transplants involved transplant from WT into a  $\gamma$ -irr (60 Gy) host. Gene expression  
1362 heatmaps display differentially expressed transcripts (FDR<0.05) as averaged  $\log_2$ CPM Z-  
1363 scores.

1364

1365 **Fig. S4. pDCS triggers transcription of immediate early genes.** List of previously published  
1366 and characterized immediate early genes (IEG) from Cullingford et al., 2008; Tullai et al., 2007;  
1367 Uhlitz et al., 2017. Each IEG is listed with its full name and Ensembl gene ID. Gene names  
1368 highlighted in red represent planarian differentially expressed putative IEG homologs to  
1369 vertebrate counterpart.

1370

1371 **Fig. S5. Treatment with dihydropyridines blocks pDCS effects.** (A) Schematic showing WT  
1372 donor/ $\gamma$ -irr host transplanted planarian subjected to 60min pDCS with 24hr 5 $\mu$ M nifedipine  
1373 soak. Tail tissue was isolated and gene expression for (B) *piwi-1*, *soxP-2*, *fgfr-1*, *egr-1*, *hnf-4*,  
1374 *nkx2.2*, and *inx-13* as well as (C) DDR genes: *MRE11*, *Ku70*, and *Rad51* measured by qRT-PCR  
1375 (n=12, 3 biological replicates). (D) Double FISH was performed on sagittal cross-sections of  
1376 sham control planarian and planarian exposed to 15min pDCS following 24hr 5 $\mu$ M nifedipine  
1377 incubation (n=6). (E) Venn diagrams show percentage of *agat-1*<sup>+</sup> cell population expressing  
1378 *piwi-1*<sup>+</sup> (left) or *piwi-1*<sup>+</sup> cells expressing *agat-1*<sup>+</sup> (right). (F) The average number of *piwi-1*<sup>+</sup> cells  
1379 and *agat-1*<sup>+</sup> cells within tail tissue following 15min pDCS vs. sham planarian per section. (G)  
1380 Gene expression levels of neoblast markers following 24hr 5 $\mu$ M nifedipine soak measured by  
1381 qRT-PCR within 15min pDCS compared to the sham group (n=12, three biological replicates).  
1382 (H) Heatmaps showing significantly differentially expressed transcripts involved in calcium  
1383 signaling pathways for planarians treated with 15-minutes and 60-minutes pDCS treatment.

1384 RNA-seq data collected from tail tissue explants of irradiated and control animals (data was  
1385 collected by pooling tails from four independently treated pDCS or sham planaria across three  
1386 independent experimental trials). Gene expression heatmaps display differentially expressed  
1387 transcripts (FDR<0.05) as averaged log<sub>2</sub>CPM Z-scores. Data represented as mean ± SEM.  
1388 Statistical significance: (B, C, G) multiple comparison one-way ANOVA; (F) Students *t*-test:  
1389 \*\* $P \leq 0.01$ , \*\*\* $P \leq 0.001$ , \*\*\*\* $P \leq 0.0001$ . Scale bars, 100µm.

1390

1391 **Fig. S6. Single-cell transcriptomic analysis displays an extensive spread enrichment of**  
1392 **voltage-gated calcium channel alpha1S subunit in planarian tissues.** (A) Single-cell  
1393 distribution of L-type Ca<sub>v</sub> alpha 1S subunit transcript (dd\_smed\_v4\_8899\_0\_1) taken from  
1394 *Planarian digiworm* database (Fincher et al., 2018). (B) Graphical key depicting localization for  
1395 cell populations. (C) Listed cluster enrichment of L-type Ca<sub>v</sub> alpha 1S subunit transcript showing  
1396 high expression in neural, muscle, parenchymal, epidermal, and cathepsin+ cells.

1397

1398 **Supplemental File 1. Differentially expressed transcripts and associated data for molecular**  
1399 **pathway heatmaps.** RNA-seq data showing differentially expressed transcripts for the 15 and  
1400 60 minutes timepoints and the associated BLAST data for *Homo sapiens* orthologs. Lists for cell  
1401 cycle, DNA damage, DNA repair, DNA replication, and cell death molecular pathways are in the  
1402 associated tabs of the excel workbook. All transcripts are expressed below the 5% level (B&H  
1403 FDR<0.05) as averaged log<sub>2</sub>CPM Z-scores.

1404

1405 **Supplemental File 2. Enriched biological processes, cellular components, and molecular**  
1406 **functions after applied pDCS.** Gene set enrichment analysis of RNA-seq data collected from

1407 the posterior regions of sham and planarians treated with 15 and 60 minutes of pDCS. Tissue  
1408 transplants involved transplant from WT into a  $\gamma$ -irr (60 Gy) host. Tables plot the most  
1409 significantly enriched Biological Processes, Cellular Components, and Molecular Functions.  
1410 RNA-seq data collected from tail tissue explants of irradiated and sham animals (data was  
1411 collected by pooling tails from four independently treated pDCS or sham planaria across three  
1412 independent experimental trials). Kolmogorov-Smirnov test,  $KS < 0.05$ .

1413

1414 **Supplemental File 3. Differentially expressed transcripts and associated data for NBSC and**  
1415 **IEG heatmaps.** RNA-seq data showing differentially expressed transcripts for the 15 and 60  
1416 minutes timepoints and the associated BLAST data for transcript orthologs. Lists for NBSC  
1417 (Reddien, 2018; Rink, 2018; Zeng et al., 2018b; Zhu and Pearson, 2016) and IEGs are in the  
1418 associated tabs of the excel workbook. All transcripts are expressed below the 5% level (B&H  
1419  $FDR < 0.05$ ) as averaged  $\log_2$ CPM Z-scores.

1420

1421 **Supplemental File 4. RNA-seq analysis statistical results for all transcripts.** RNA-seq  
1422 analysis statistical results the 15 and 60 minutes timepoints. Lists include the toptables of test  
1423 statistics and CPM Z-score values for all 18,419 transcripts computed in the analysis. This list  
1424 excludes lowly expressed and filtered transcripts. All transcripts are expressed as averaged  
1425  $\log_2$ CPM Z-scores.

1426

1427



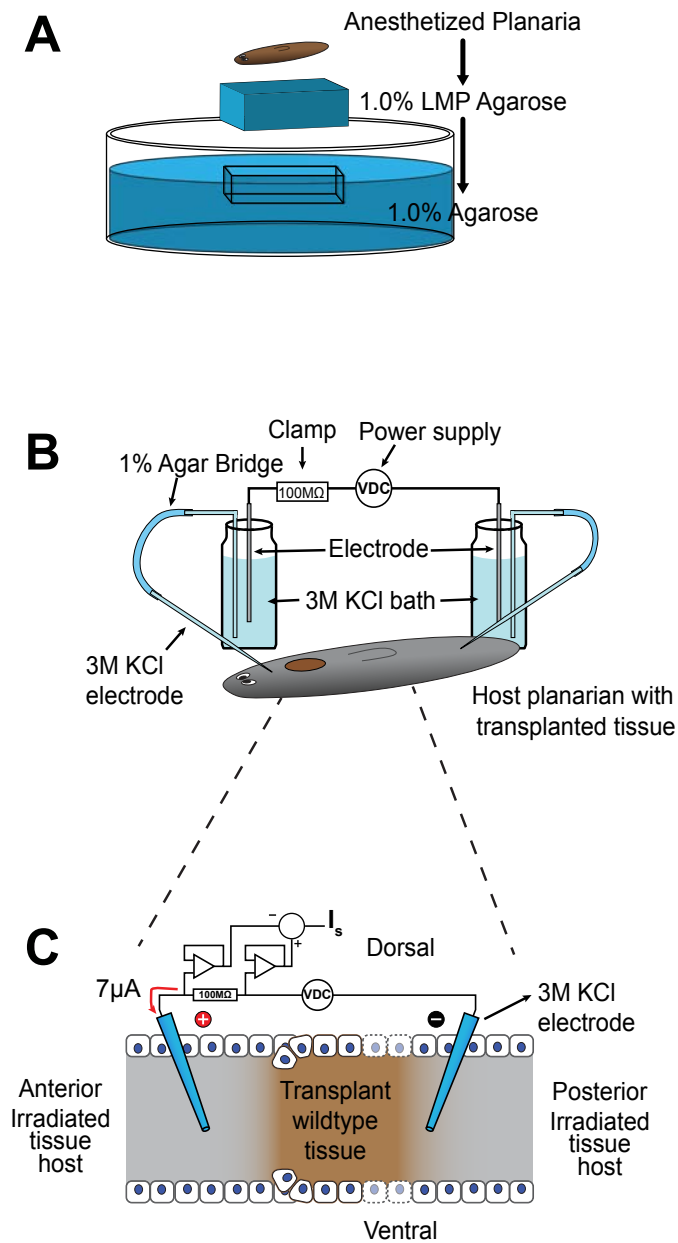

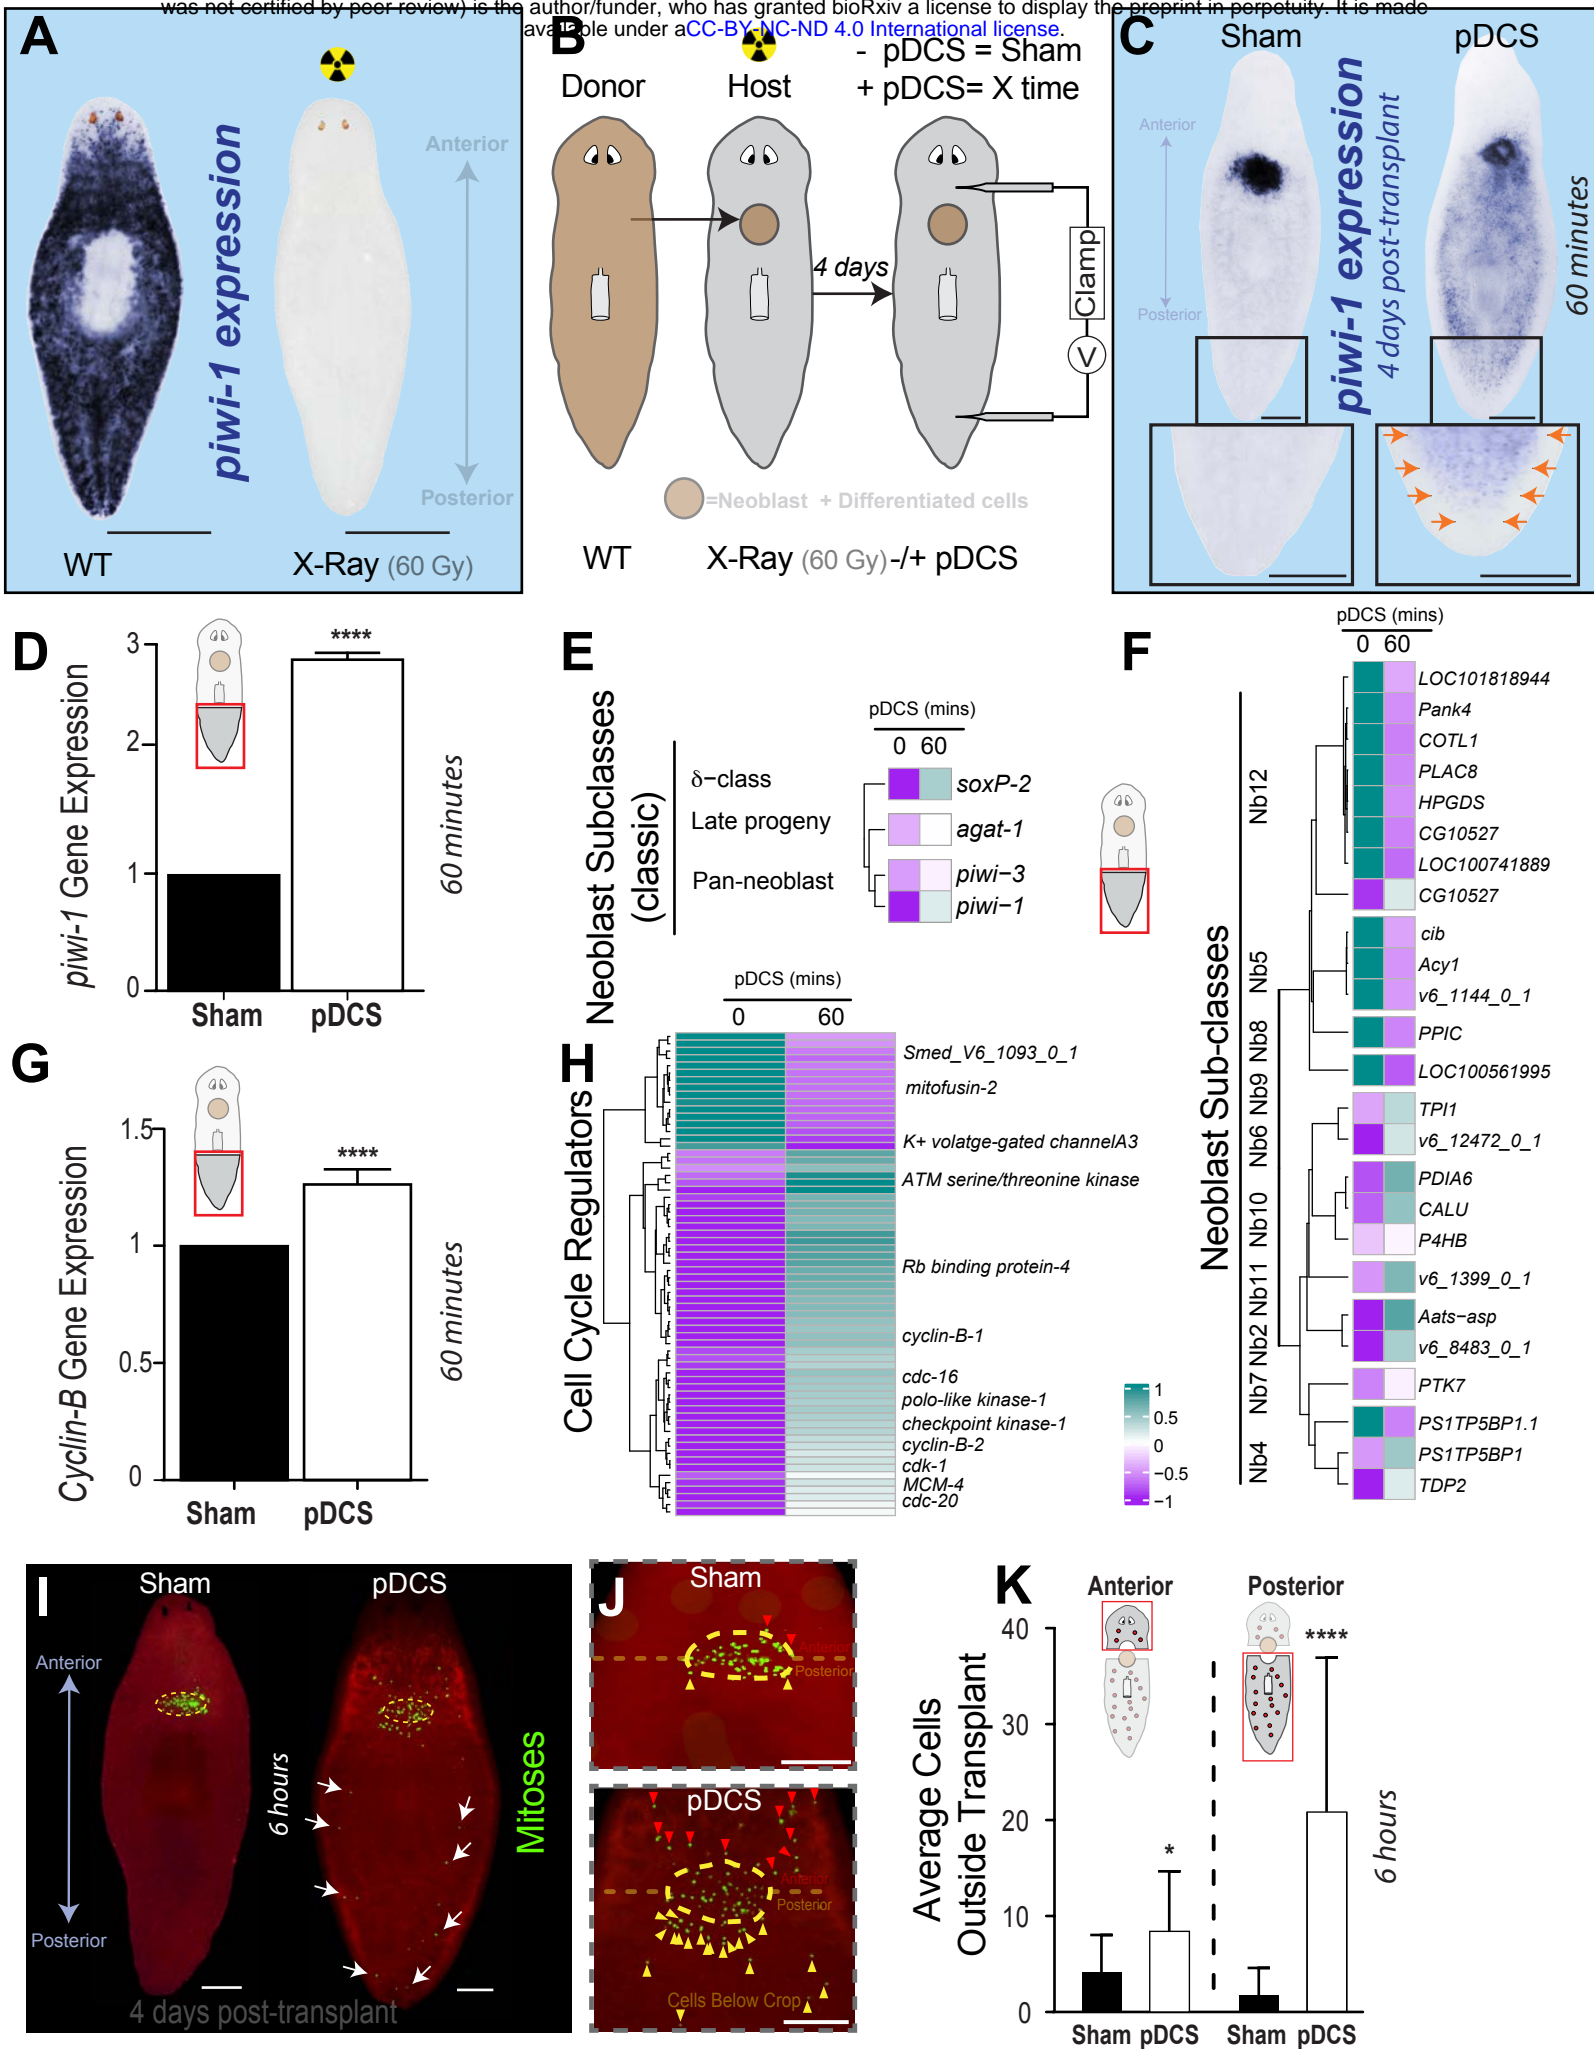

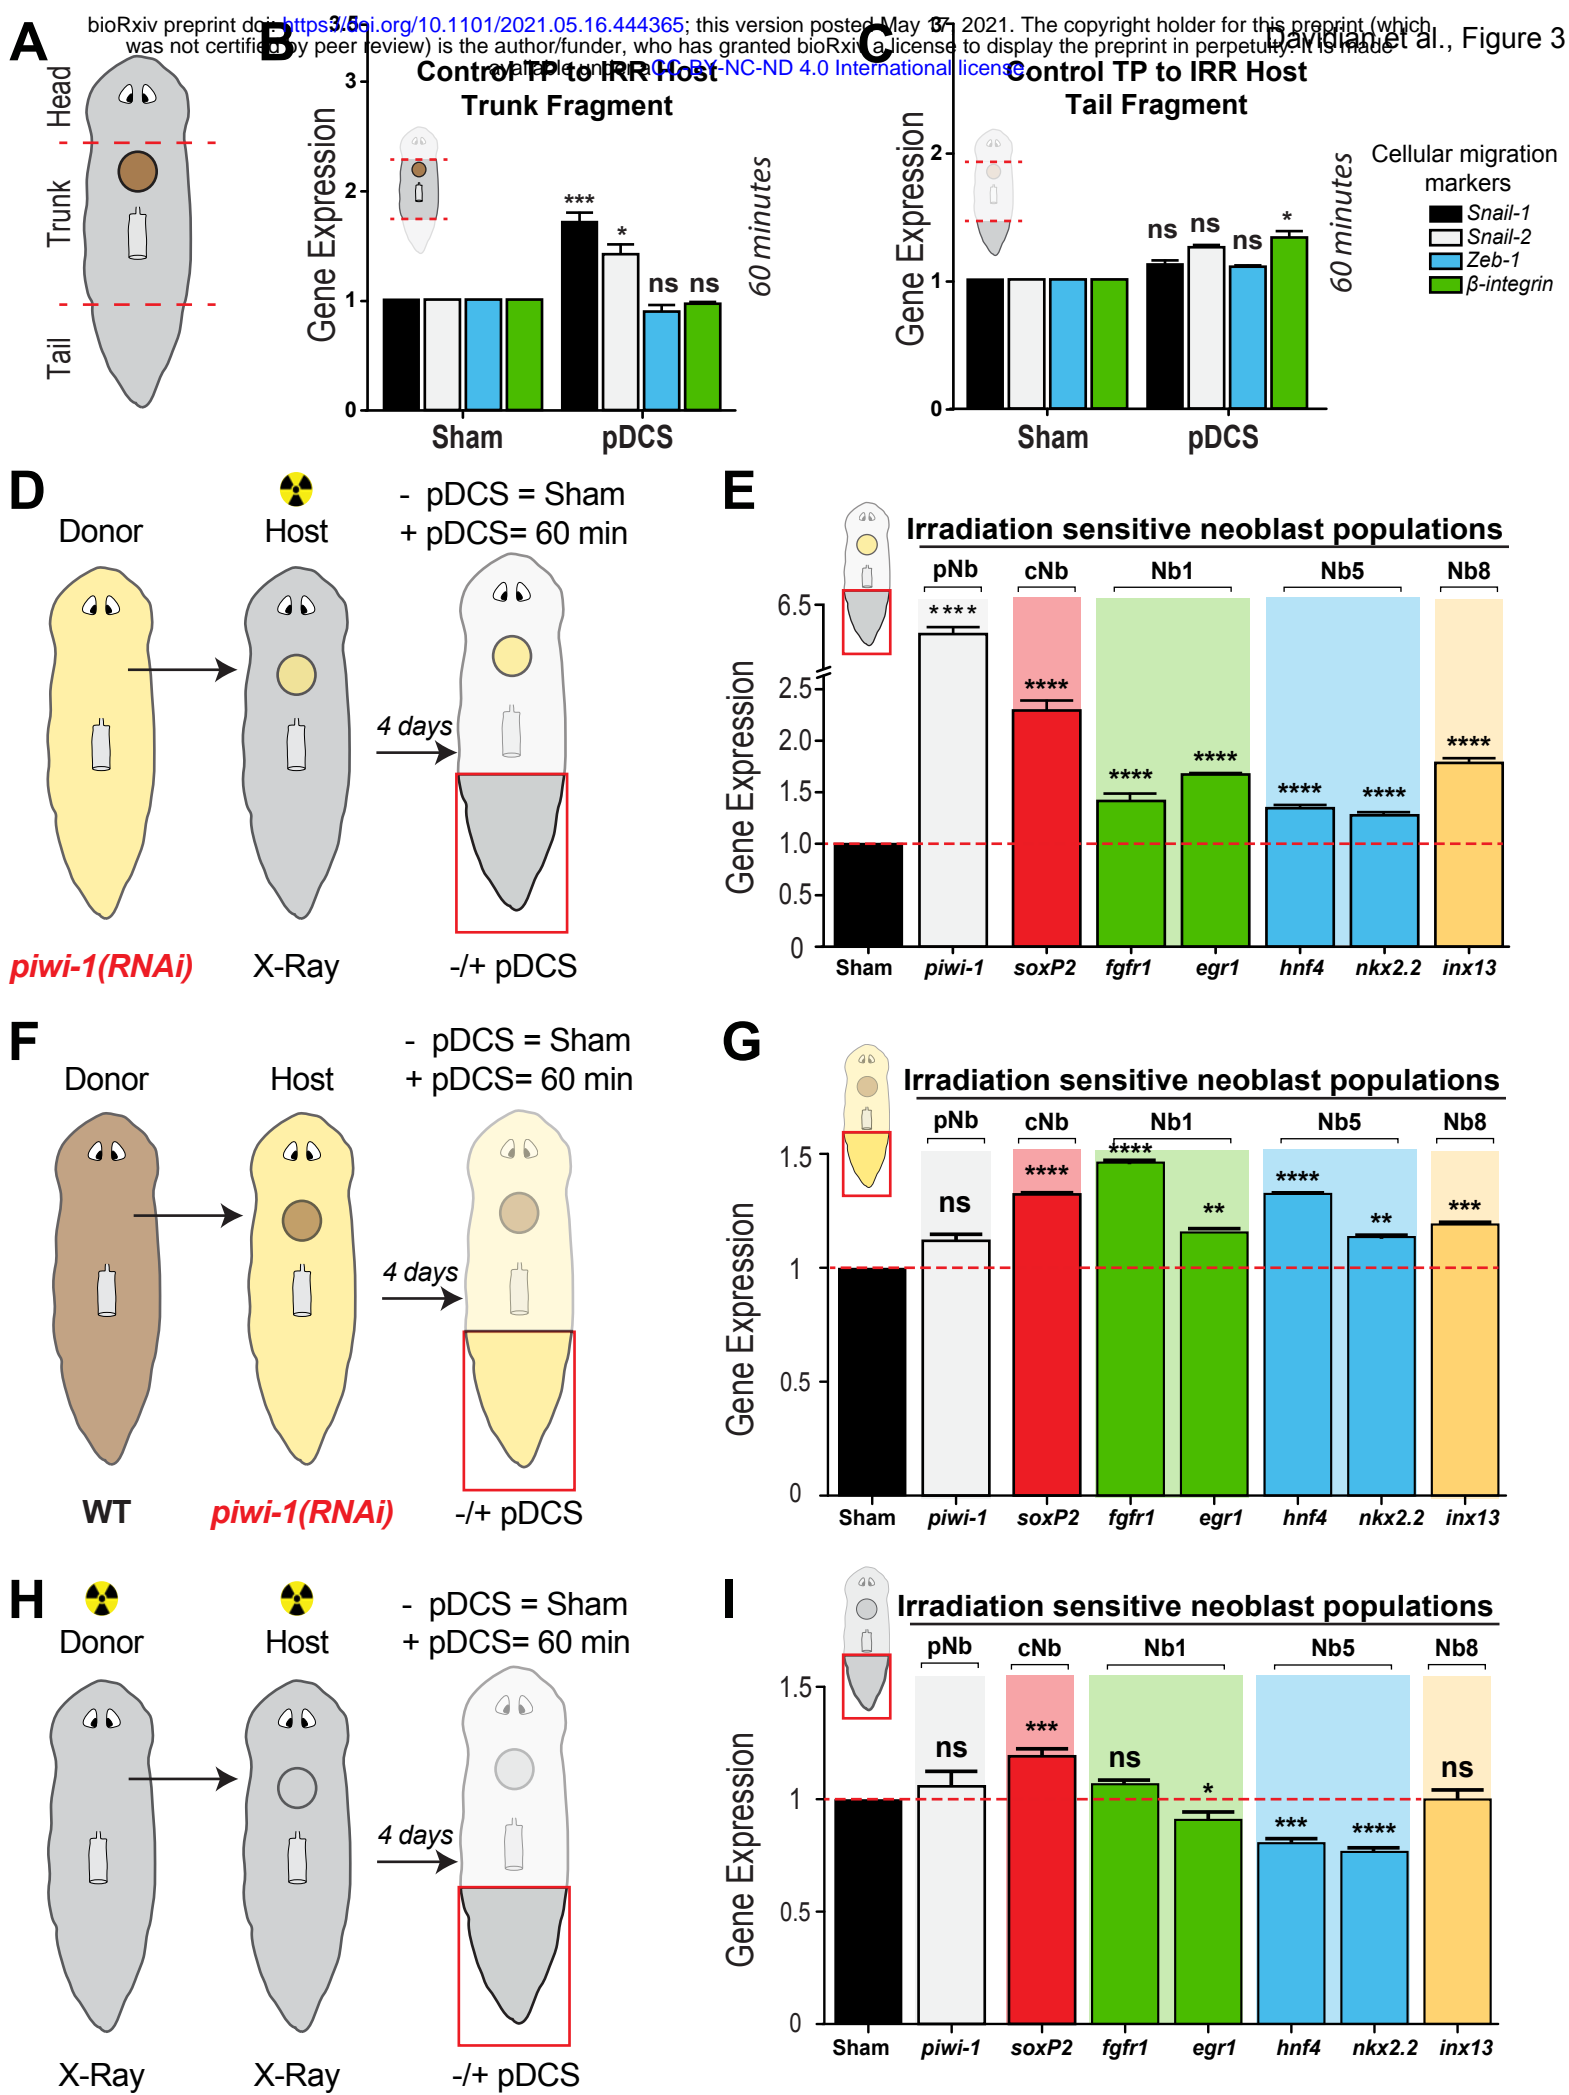

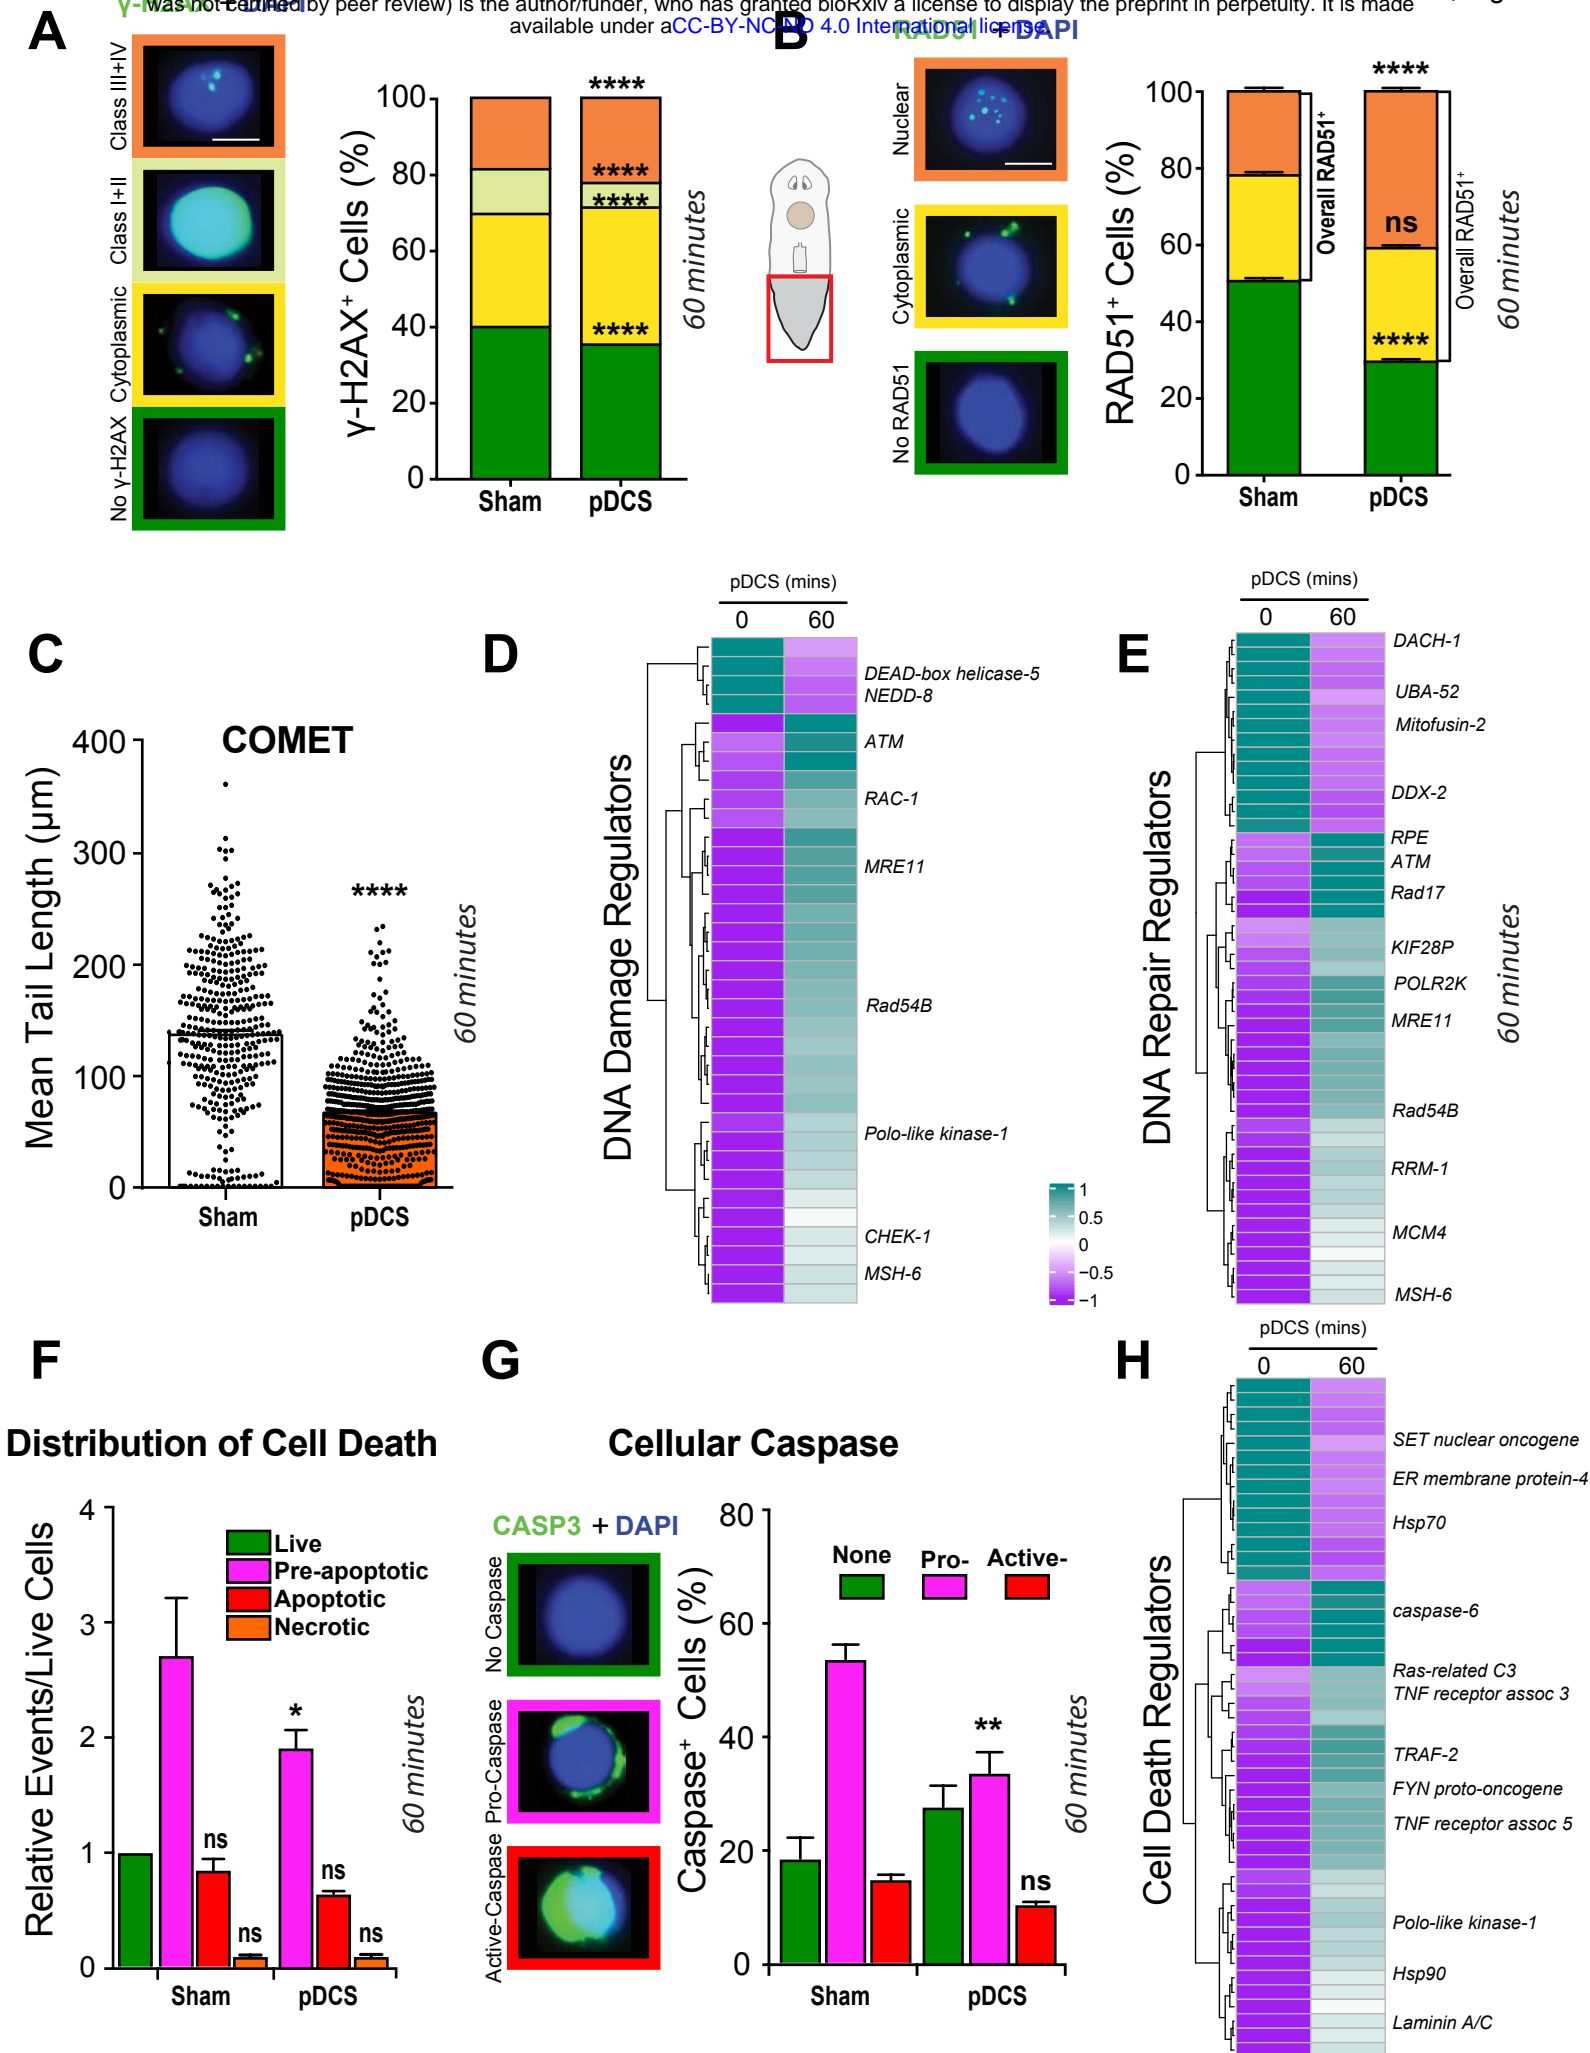

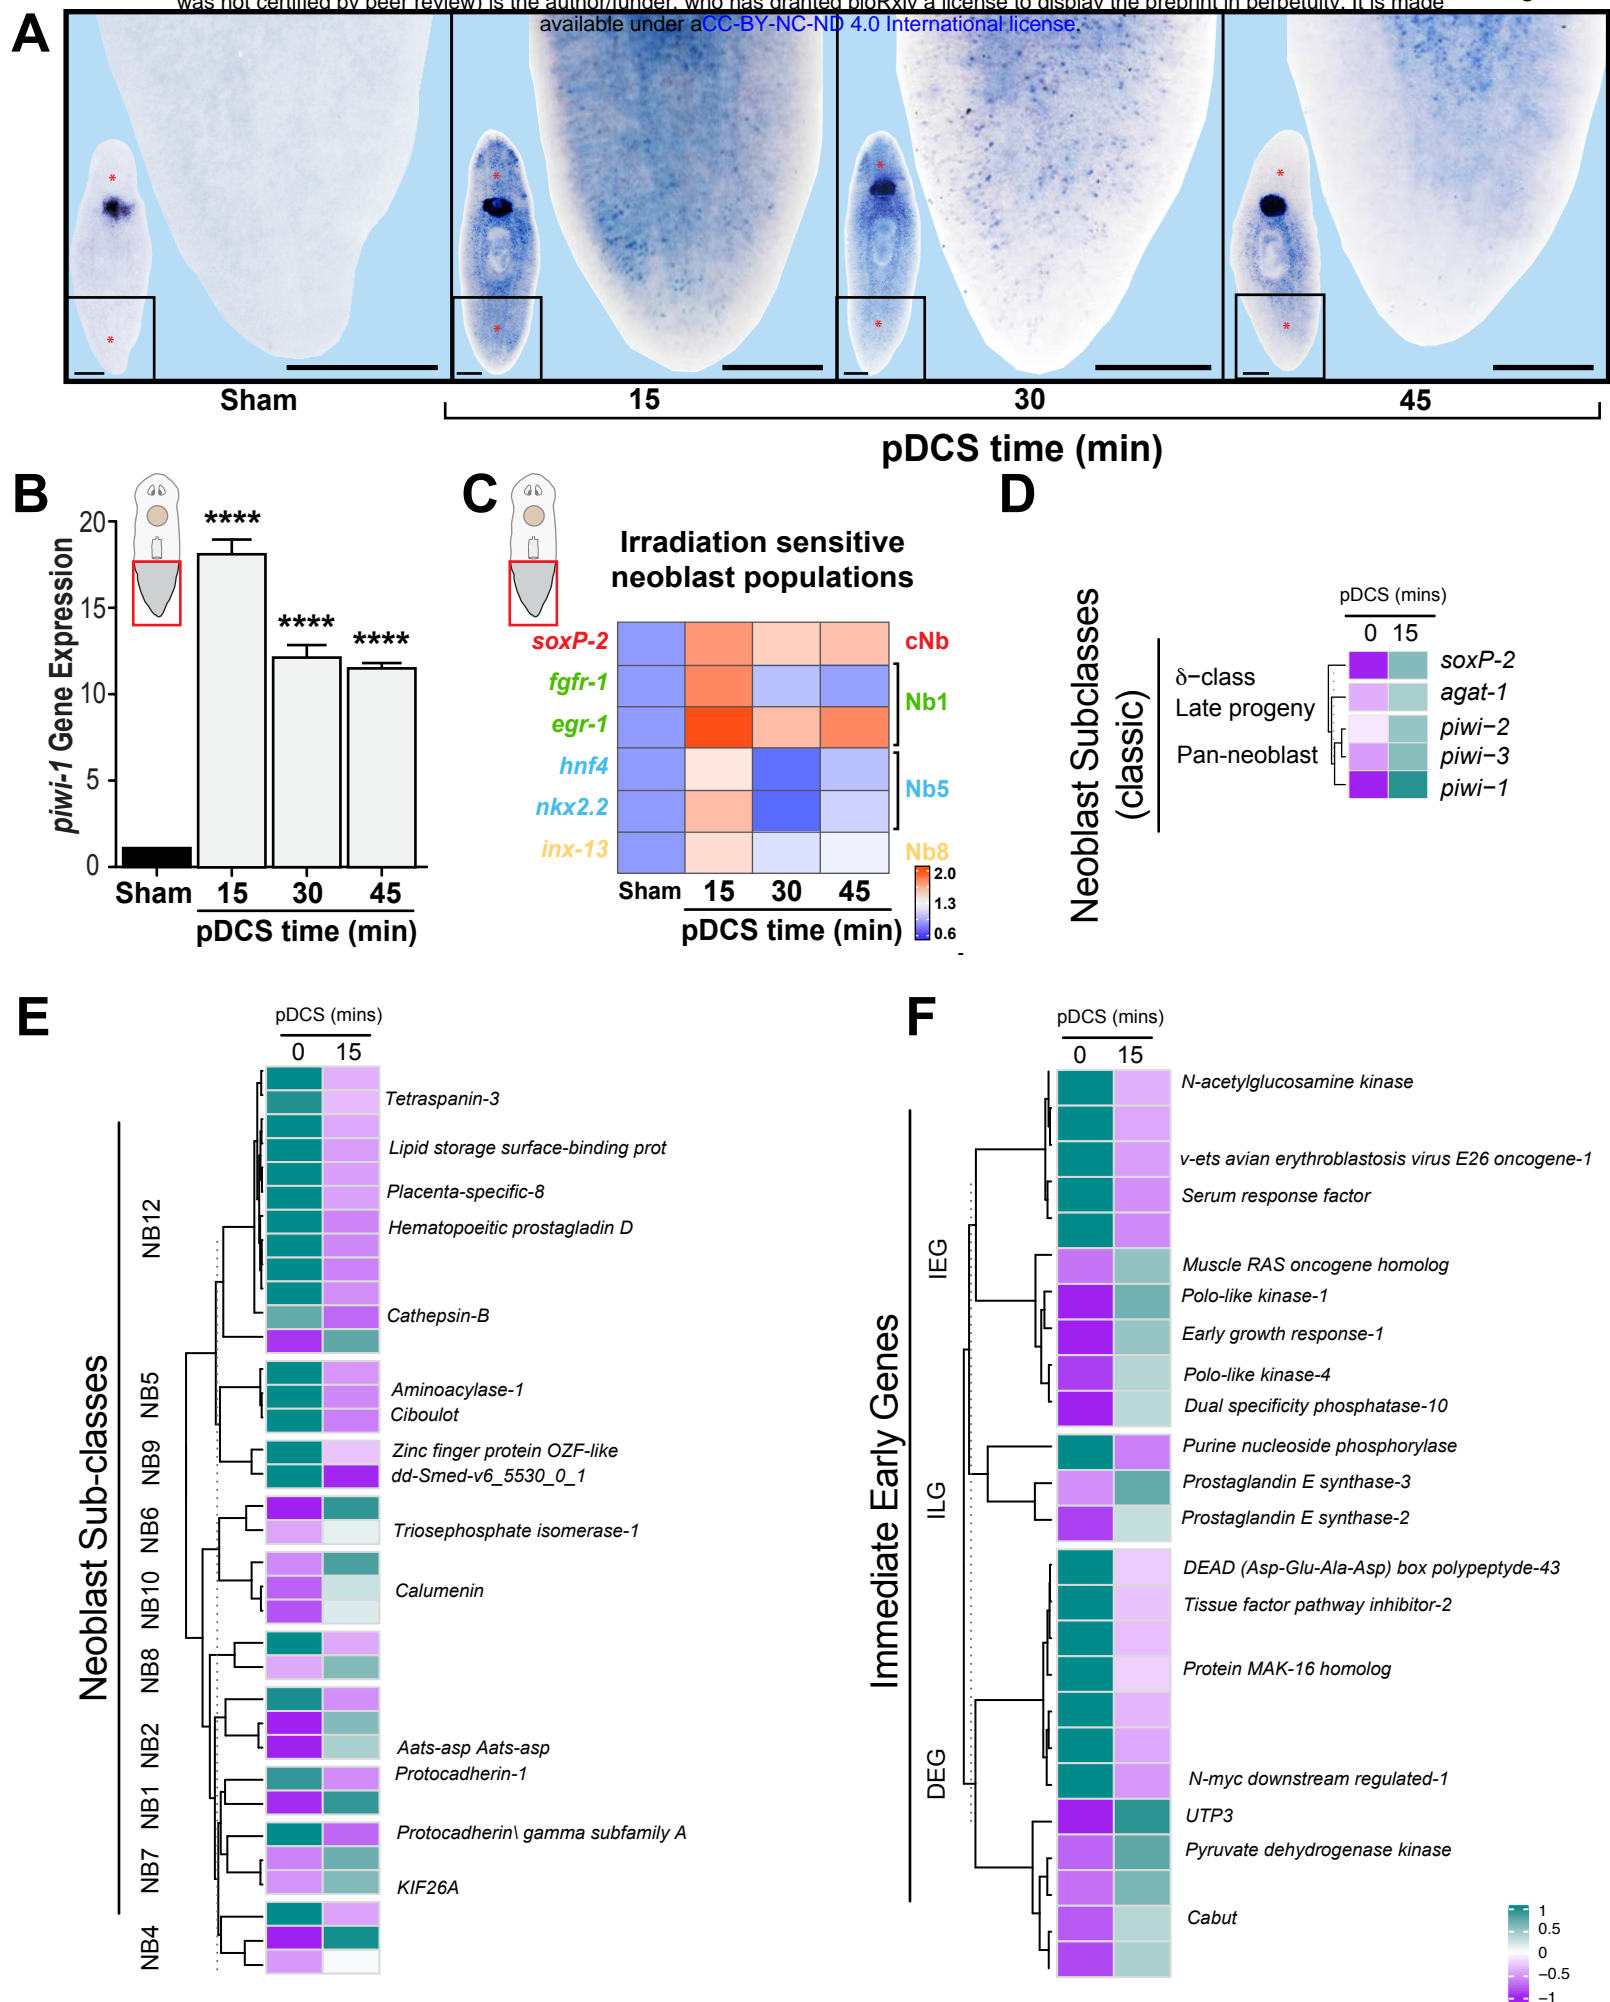



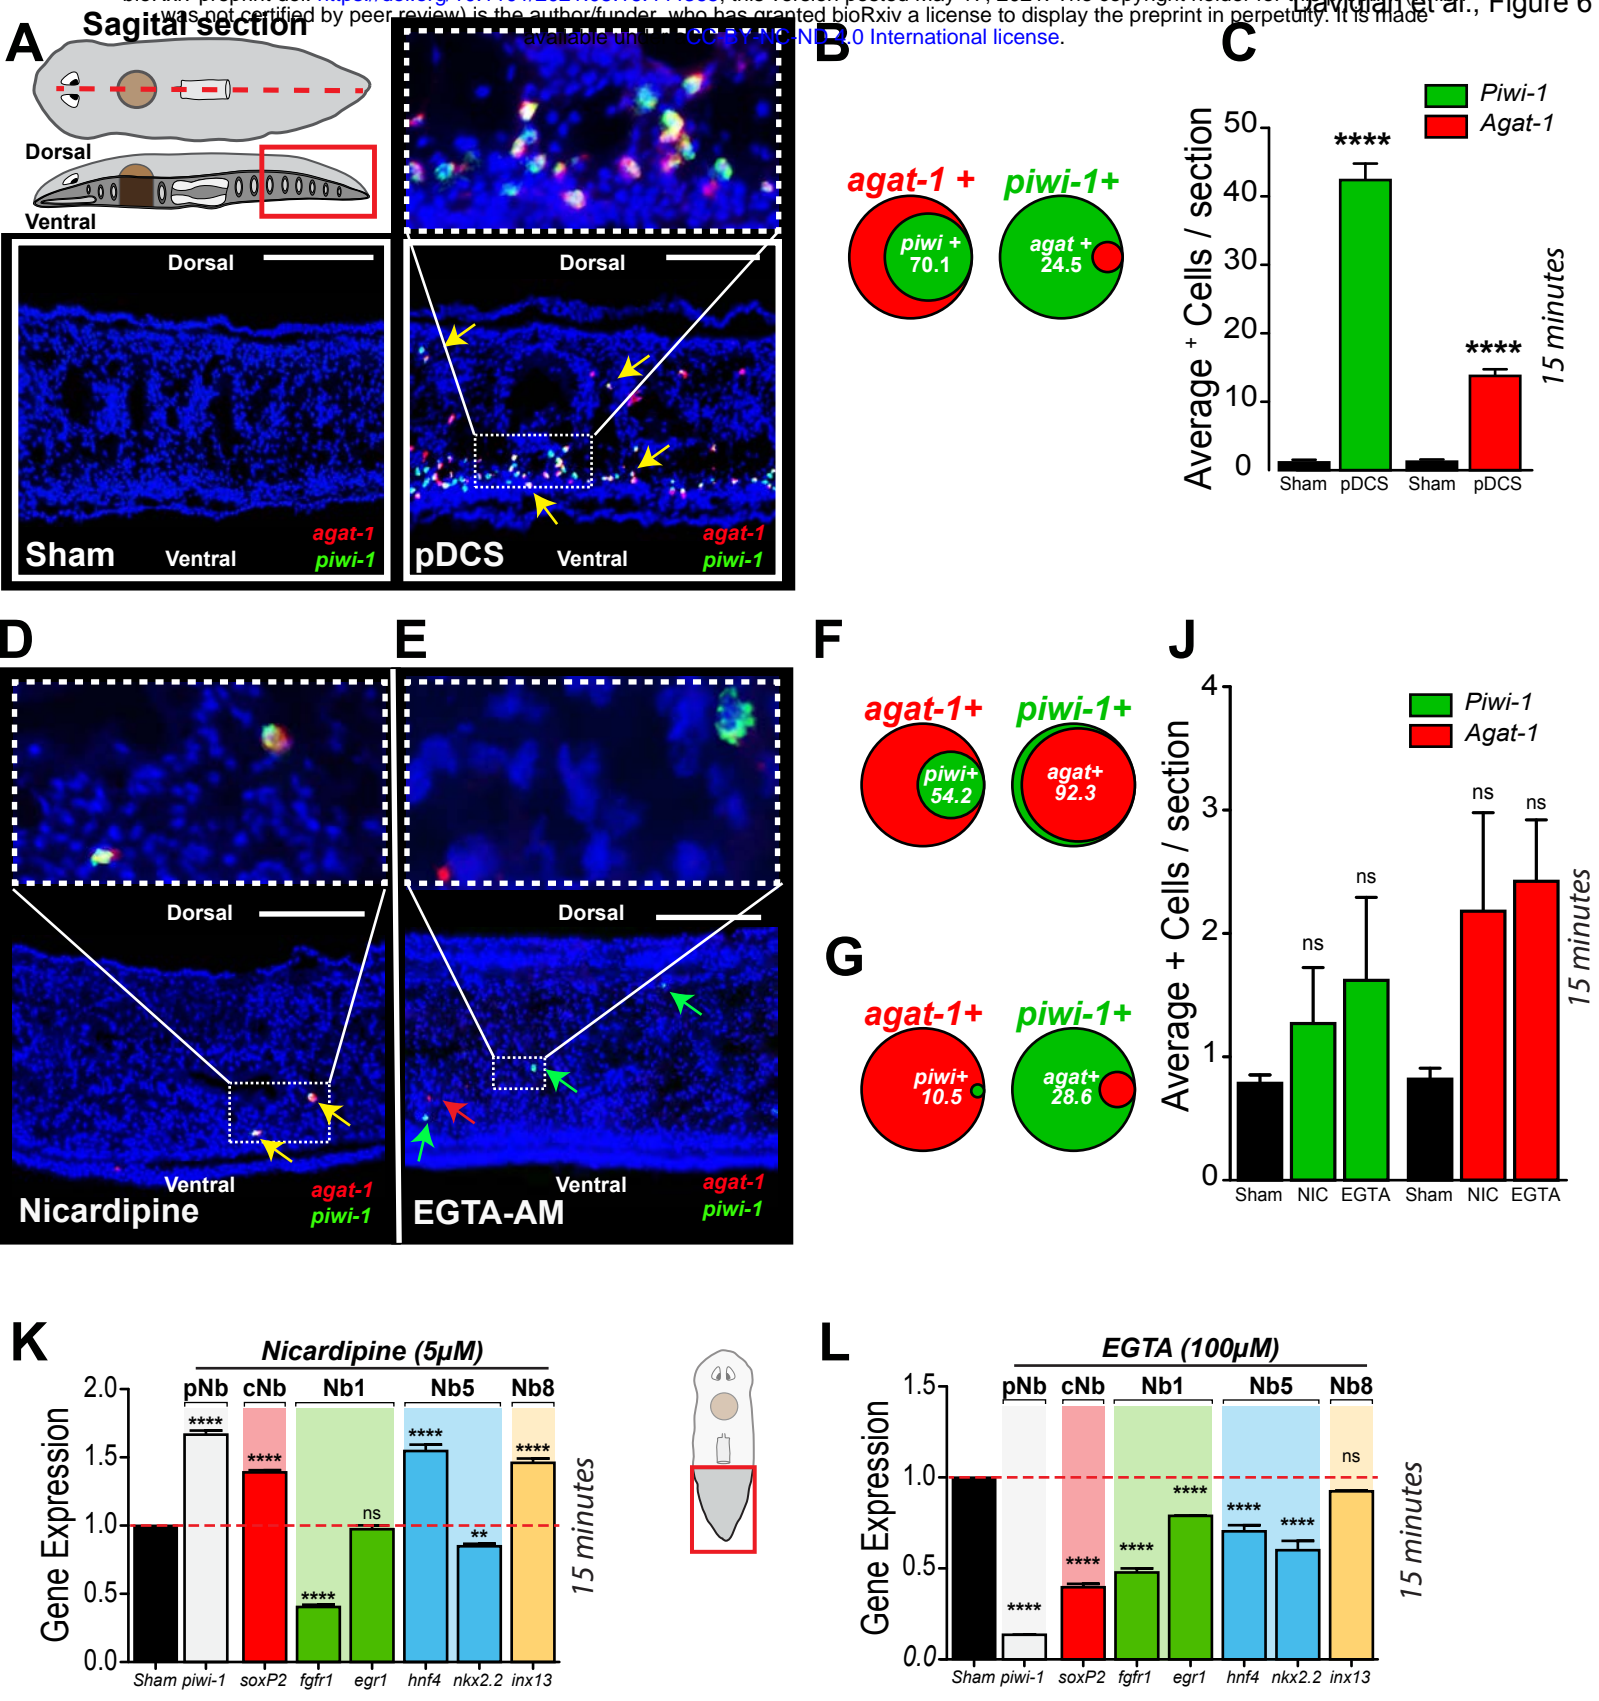

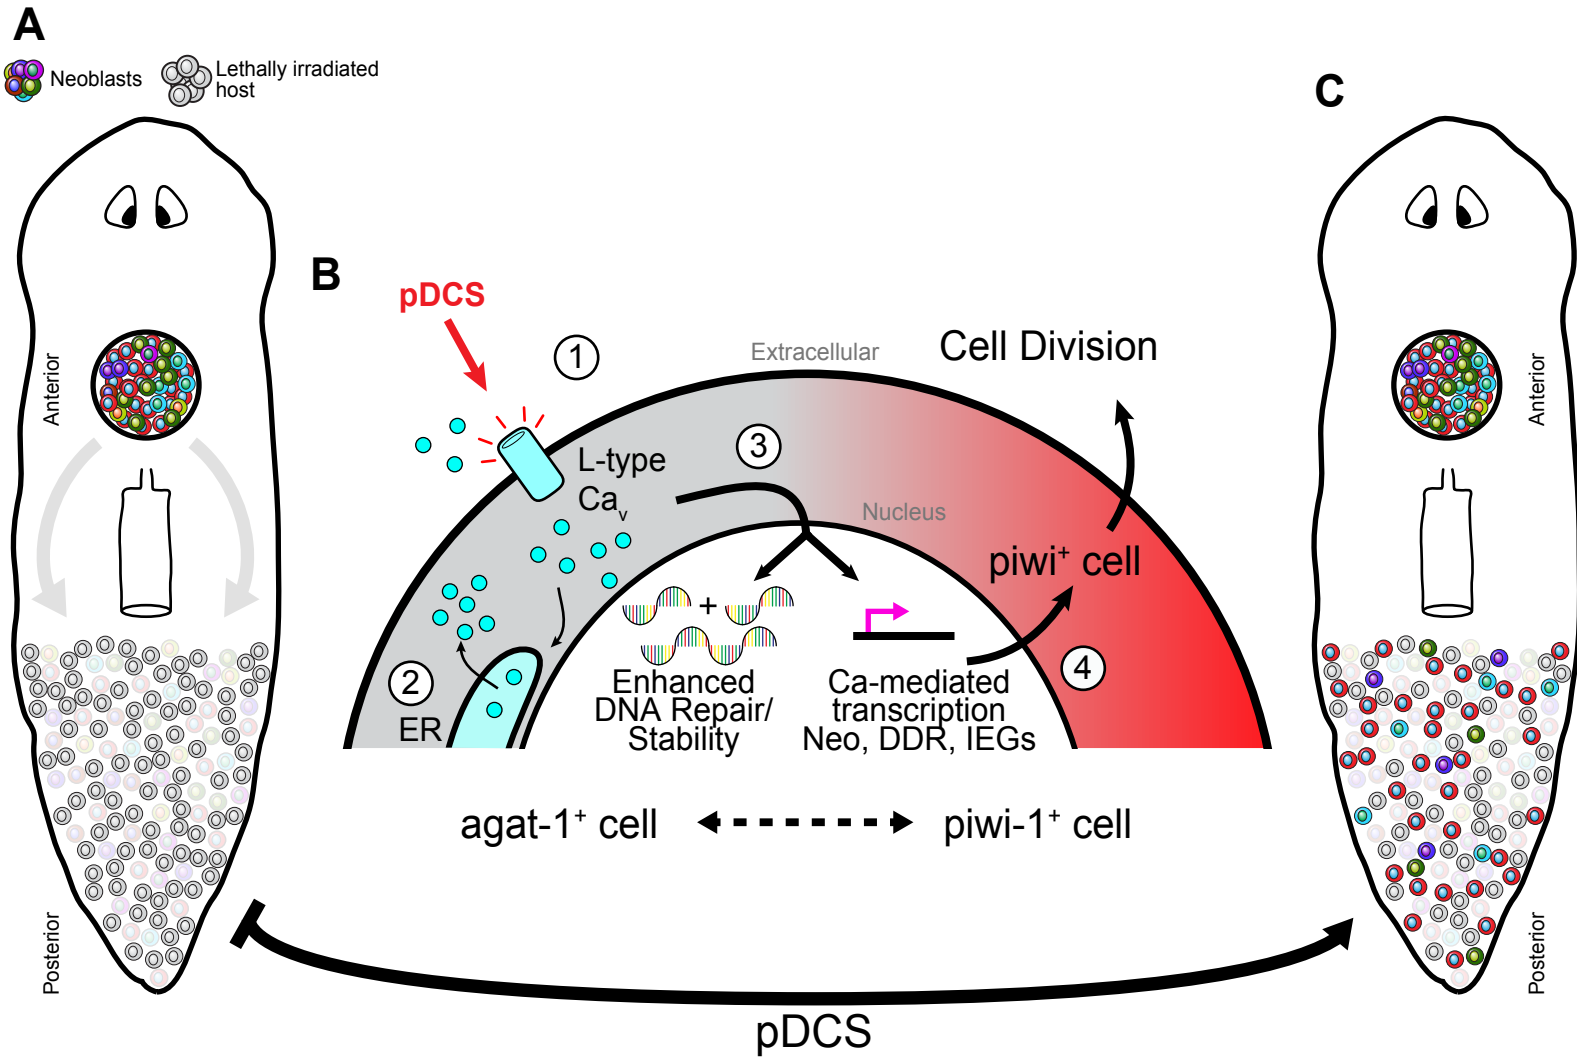

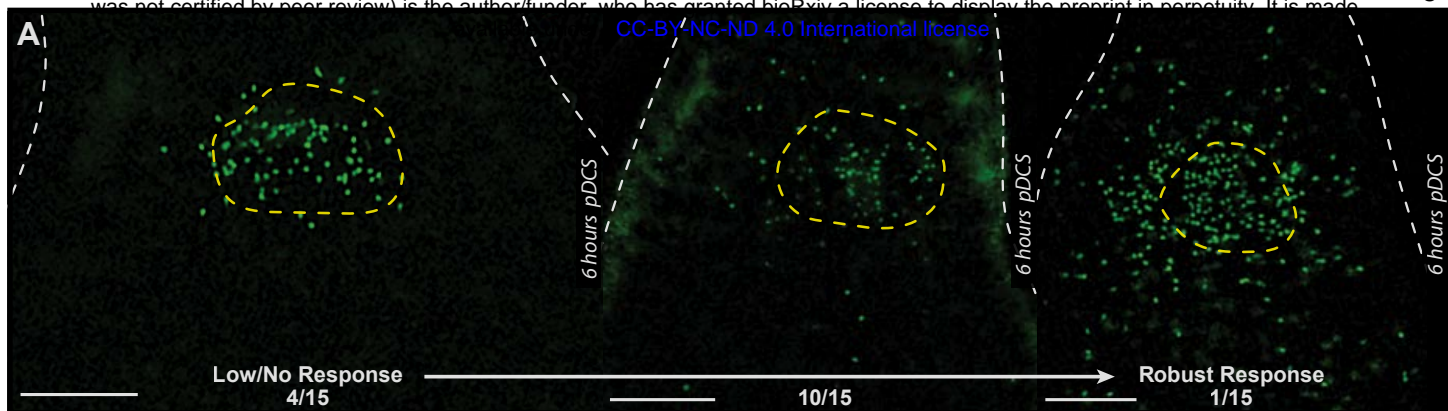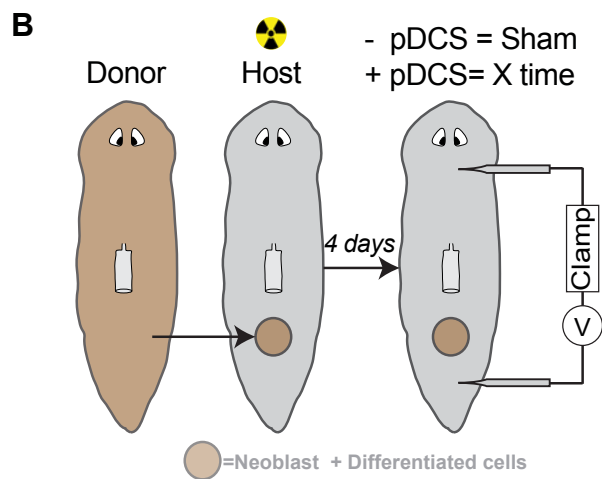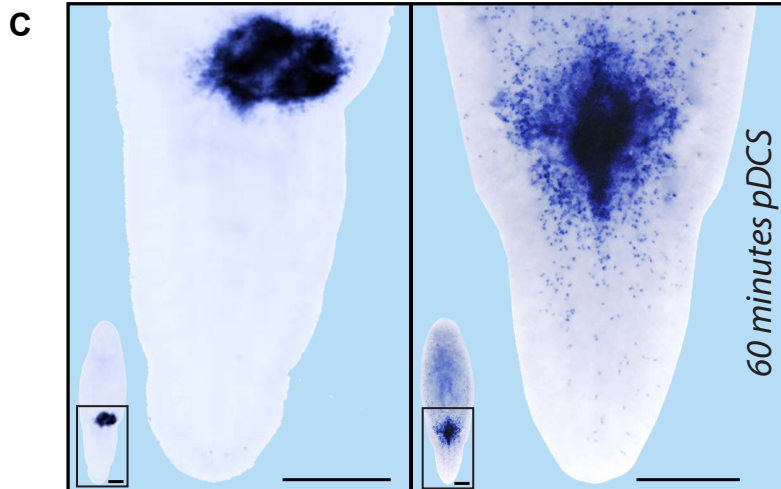



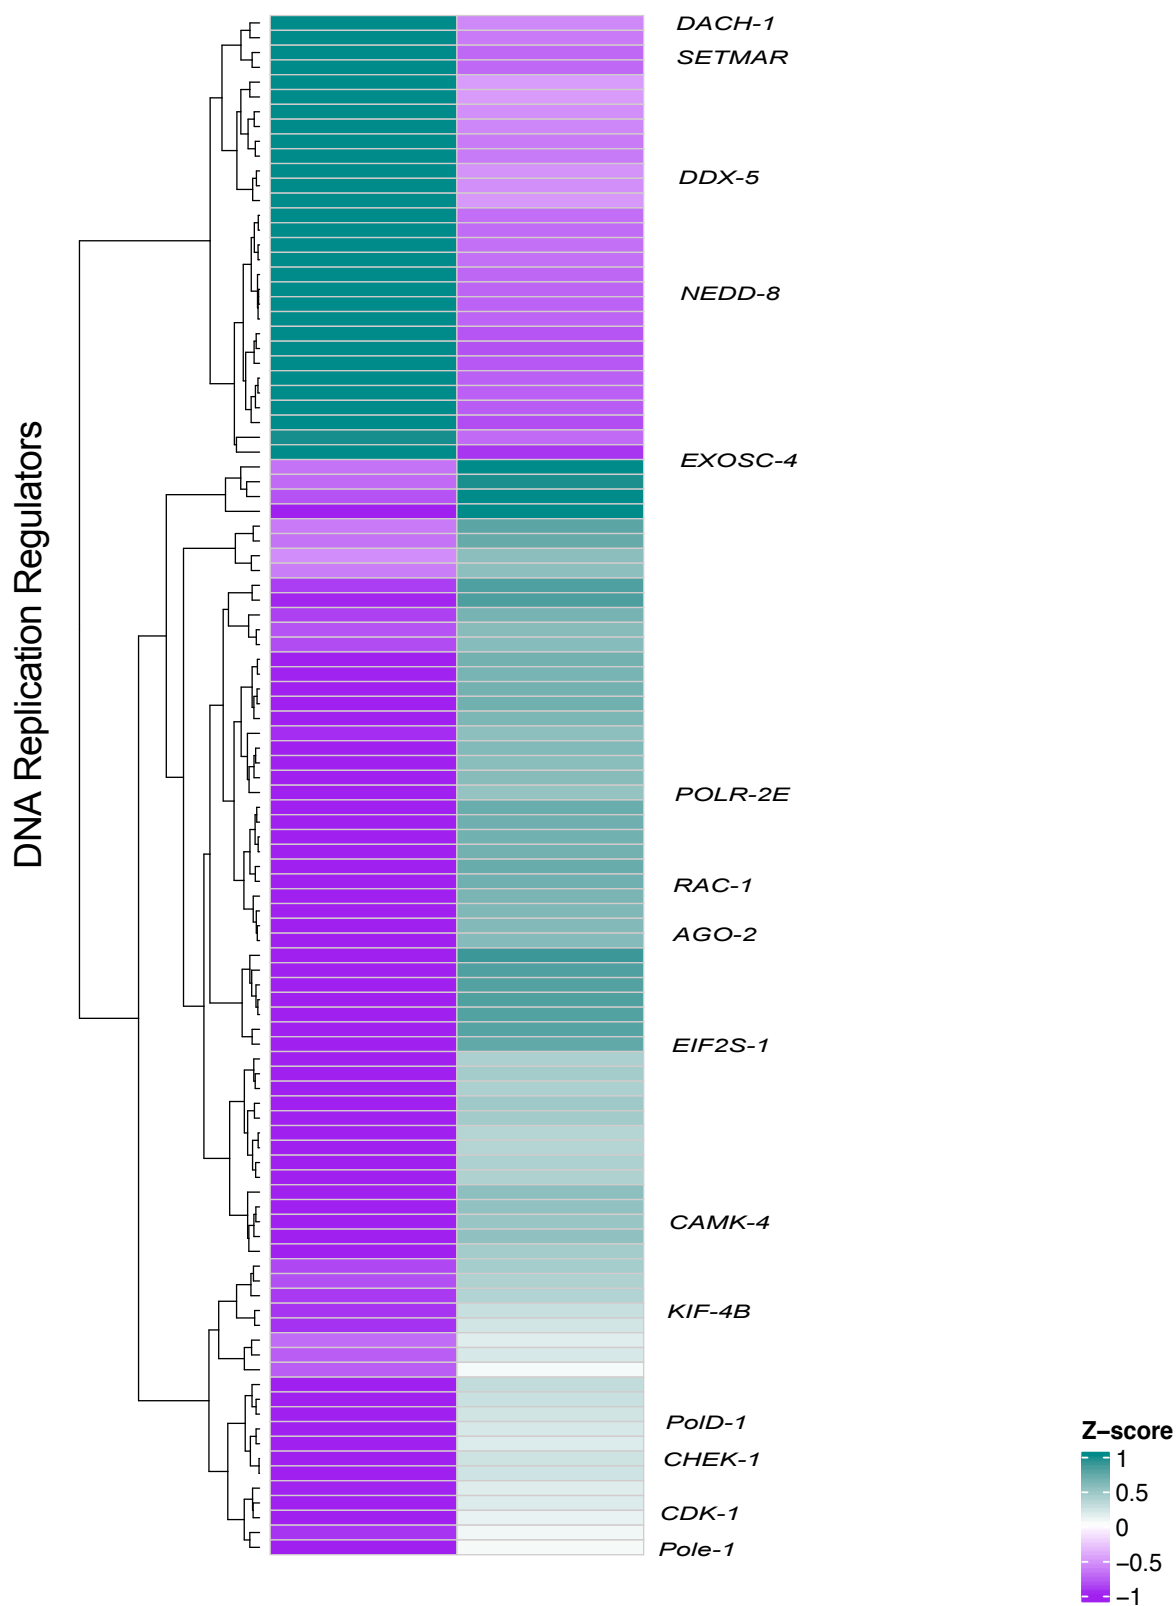

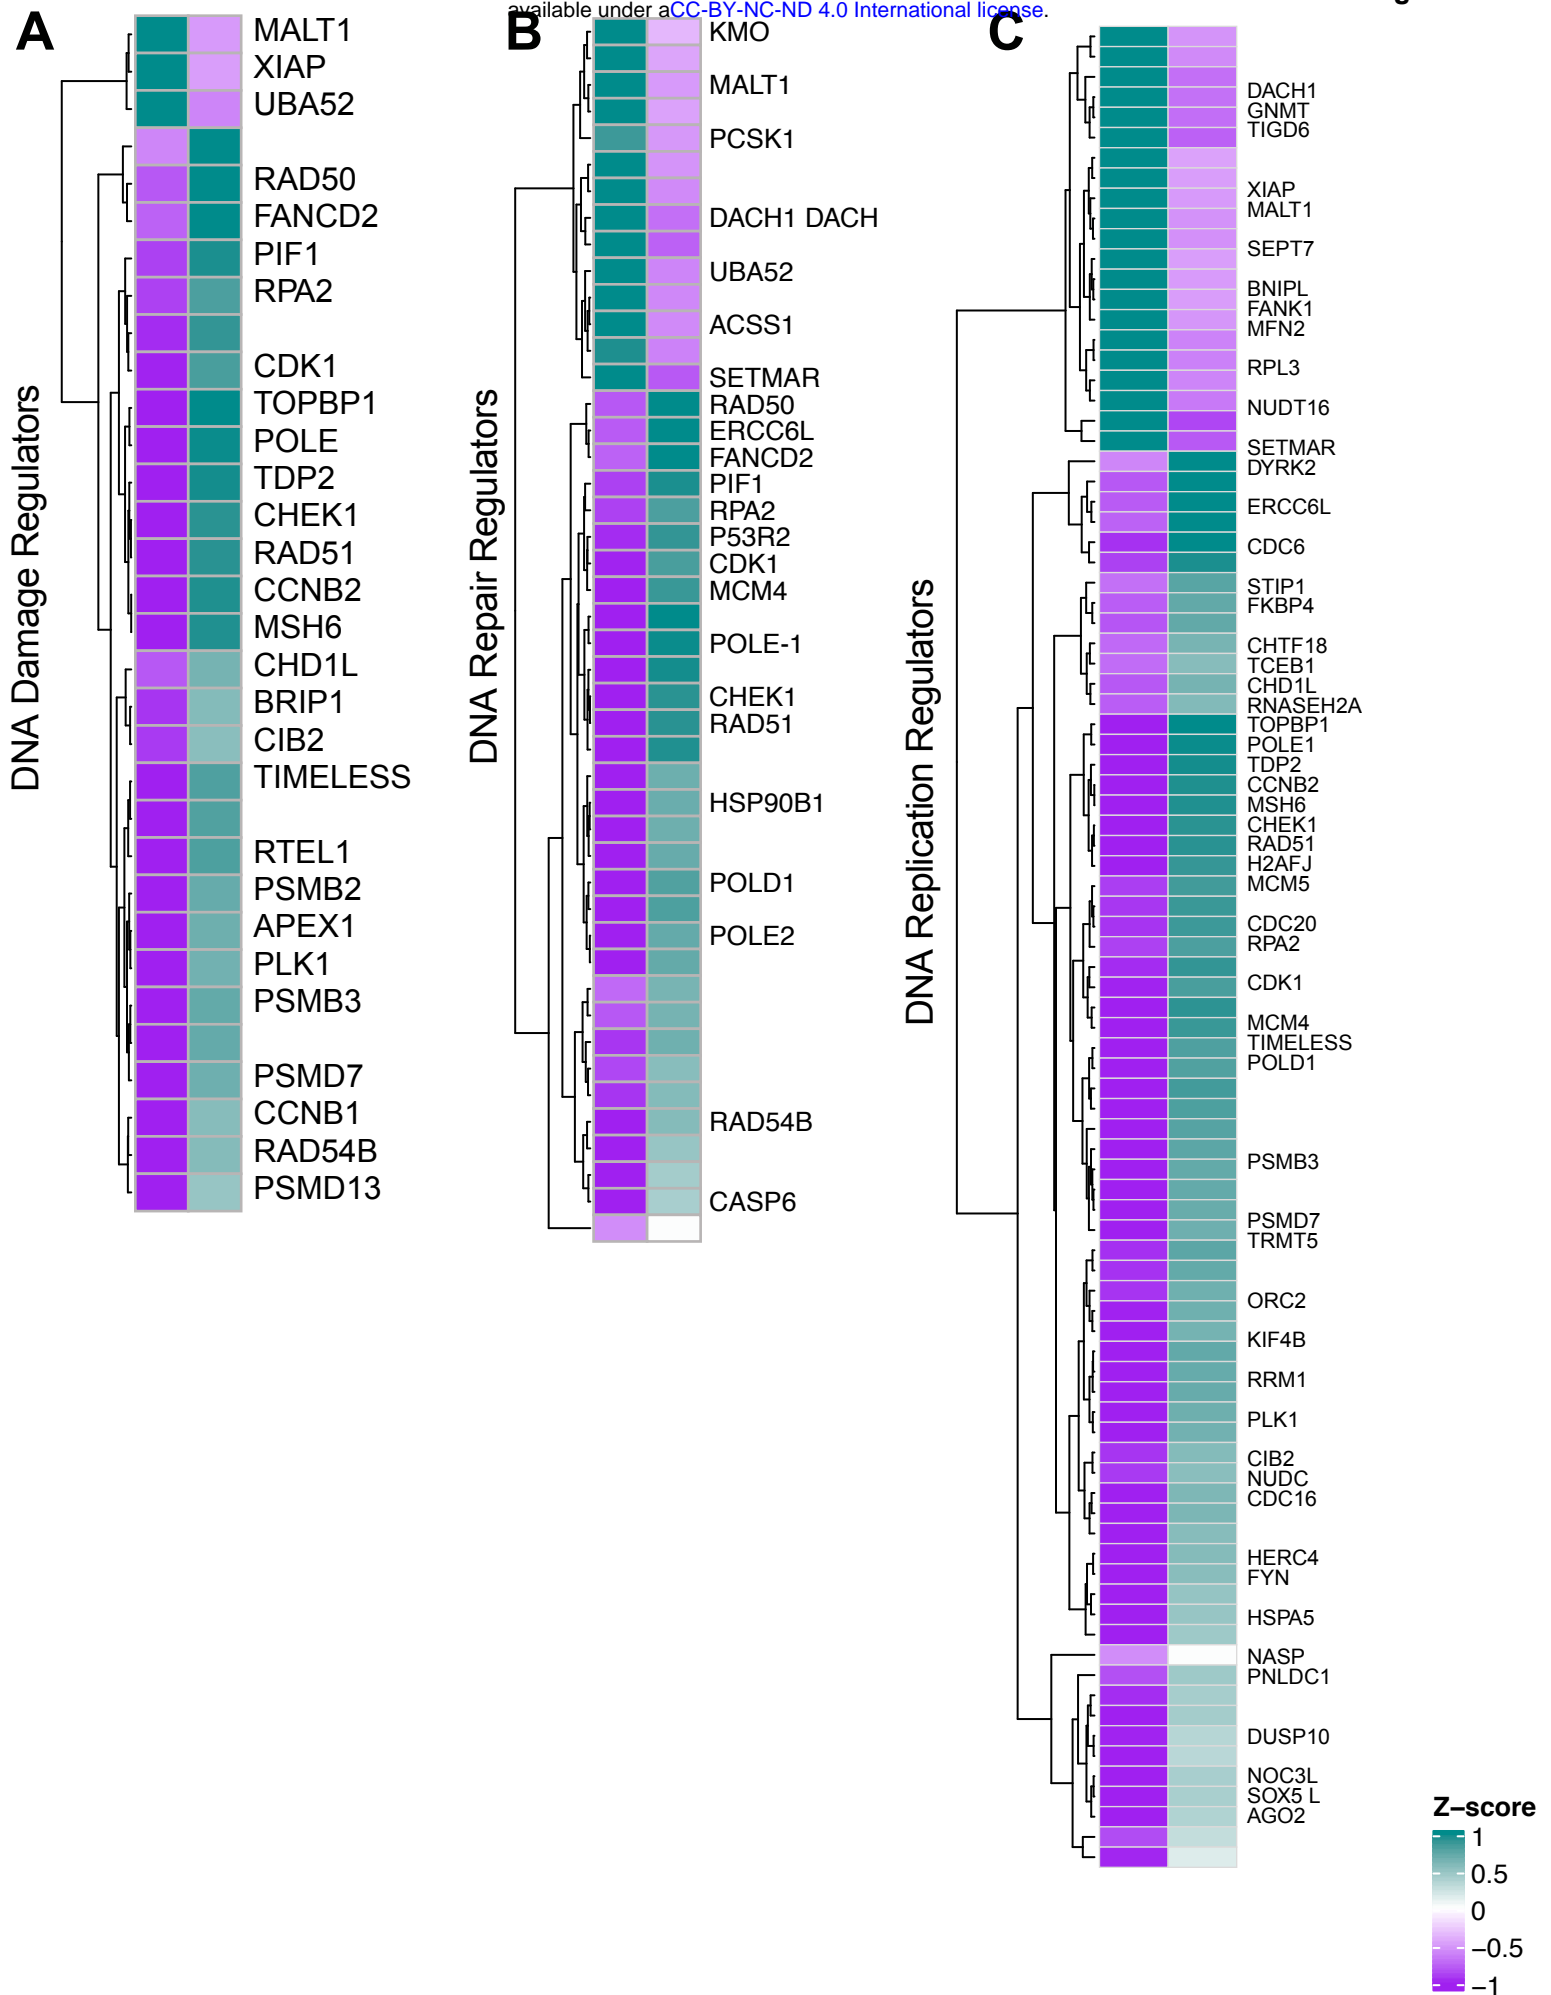

List of Known Immediate Early Genes

Figure S4

| Gene Symbol             | Gene Name                                                    | ENSEM BL ID              | Gene Symbol   | Gene Name                                                                       | ENSEM BL ID              |
|-------------------------|--------------------------------------------------------------|--------------------------|---------------|---------------------------------------------------------------------------------|--------------------------|
| JUN                     | Jun proto-oncogene, AP-1 transcription factor subunit        | ENSG00000177606          | THBS1         | thrombospondin 1                                                                | ENSG00000167801          |
| <b>PKD4</b>             | <b>pyruvate dehydrogenase kinase 4</b>                       | <b>ENSG00000128016</b>   | <b>SRE</b>    | <b>serum response factor</b>                                                    | <b>ENSG00000112658</b>   |
| ZFP36                   | ZFP 36 ring finger protein                                   | ENSG00000152413          | ARC           | activity regulated cyto skeleton associated protein                             | ENSG00000198576          |
| HOMER1                  | homer scaffolding protein 1                                  | ENSG00000067082          | ZYX           | zyxin                                                                           | ENSG00000159840          |
| KLF6                    | Kruppel like factor 6                                        | ENSG00000140650          | RNF22         | ring finger protein D2                                                          | ENSG00000133874          |
| PMM2                    | phosphomannomutase 2                                         | ENSG00000129502          | <b>NDRG1</b>  | <b>N-myc do wnstream regulated 1</b>                                            | <b>ENSG00000104419</b>   |
| DNAJB1 (Hsp40 member B) | DnaJ heat shock protein family G protein-coupled receptor 50 | ENSG00000102923          | SLC2A3        | solute carrier family 2 member 3                                                | ENSG00000195804          |
| GPR30                   | G protein-coupled receptor 3                                 | ENSG00000172231          | <b>SLC2A1</b> | <b>solute carrier family 2 member 1</b>                                         | <b>ENSG00000107594</b>   |
| NPX1                    | nuclear RNA export factor 1                                  | ENSG00000109508          | INSIG1        | insulin induced gene 1                                                          | ENSG00000186480          |
| JUNB                    | JunB proto-oncogene, AP-1 transcription factor subunit       | ENSG00000172233          | RHOB          | ras hom olog family member B                                                    | ENSG00000143878          |
| NR4A3                   | nuclear receptor subfamily 4 group A member 3                | ENSG00000099860          | CEBPD         | CCAAT/enhancer binding protein delta                                            | ENSG00000122869          |
| GADD45B                 | growth arrest and DNA damage inducible beta                  | ENSG00000199868          | <b>PNP</b>    | <b>purine nucleoside phospho rylase</b>                                         | <b>ENSG00000189805</b>   |
| NR4A2                   | nuclear receptor subfamily 4 group A member 2                | ENSG00000153234          | PLAT          | plasmalogen activator, tissue type                                              | ENSG00000104368          |
| KDM6B                   | lysine demethylase 6B                                        | ENSG00000152510          | TXNL4B        | thioredo xin like 4B                                                            | ENSG00000140830          |
| F2RL1                   | F2R like trypsin receptor 1                                  | ENSG00000164251          | IER2          | immediate early response 2                                                      | ENSG00000160888          |
| GTF2B                   | general transcription factor IIB                             | ENSG00000157947          | PLAU          | plasminogen activator, uro kinase                                               | ENSG00000122261          |
| F3                      | coagulation factor III, tissue factor                        | ENSG00000107525          | HAS2          | hyaluronan synthase 2                                                           | ENSG00000170961          |
| TTFB2M                  | transcription factor B2, mitochondrial                       | ENSG00000152851          | BTG2          | BTG anti-proliferation factor 2                                                 | ENSG00000159388          |
| UBALD2                  | UBA like domain containing 2                                 | ENSG00000185262          | AKR1N2        | akain 2                                                                         | ENSG00000155334          |
| ZFP36L2                 | ZFP 36 ring finger protein like 2                            | ENSG00000152518          | EFNB2         | ephrin B2                                                                       | ENSG00000125266          |
| IER3                    | immediate early response 3                                   | ENSG00000157331          | SYAP1         | synapse associated protein 1                                                    | ENSG00000169595          |
| <b>PTGS2</b>            | <b>prostaglandin-endoperoxide synthase 2</b>                 | <b>ENSG00000173756</b>   | FOSL1         | FOS like 1, AP-1 transcription factor subunit                                   | ENSG00000175592          |
| PPIR5A                  | protein phosphatase 1 regulatory subunit BA                  | ENSG00000087074          | FAM57A        | family with sequence similarity 57 member A                                     | ENSG00000167695          |
| SPRY4                   | sprouty R TK signaling antagonist 4                          | ENSG00000187678          | TNFRSF12A     | TNF receptor superfamily member 12A                                             | ENSG00000106327          |
| NP1X2                   | neuronal pentraxin 2                                         | ENSG00000106236          | <b>PLK2</b>   | <b>polo like kinase 2</b>                                                       | <b>ENSG00000164532</b>   |
| KRT8                    | keratin 8                                                    | ENSG00000170421          | CITF2         | Cbp/p300 interacting transactivator with Glu/Asp rich carboxy-terminal domain 2 | ENSG00000164442          |
| PMAP1                   | phospho l-D-amyristate-B-acetate-induced protein 1           | ENSG00000104682          | <b>TFF2</b>   | <b>tissue factor pathway inhibitor 2</b>                                        | <b>ENSG00000105825</b>   |
| <b>KLF10</b>            | <b>Kruppel like factor 10</b>                                | <b>ENSG00000105509</b>   | GEM           | GTP binding protein overexpressed in skeletal muscle                            | ENSG00000164949          |
| YRDC                    | ytDC N6-19reco nyltransferase domain containing              | ENSG00000106449          | C8orf4        | chromosome 8 open reading frame 4                                               | ENSG00000176907          |
| CVR61                   | cysteine rich angiogenic inducer 61                          | ENSG00000102871          | TNFAP3        | TNF alpha induced protein 3                                                     | ENSG00000118503          |
| <b>ABHD5</b>            | <b>abhydrolase domain containing 5</b>                       | <b>ENSG00000101098</b>   | SERP1NB9      | serpin family B member 9                                                        | ENSG00000170542          |
| <b>COX10B</b>           | <b>coenzyme Q10B</b>                                         | <b>ENSG00000105520</b>   | KLF4          | Kruppel like factor 4                                                           | ENSG00000106826          |
| <b>MAK6</b>             | <b>MAK6 hom olog</b>                                         | <b>ENSG00000108042</b>   | MXD1          | MAX dimerization protein 1                                                      | ENSG00000195728          |
| CTGF                    | connective tissue growth factor                              | ENSG00000108523          | <b>RBM14</b>  | <b>RNA binding motif protein 14</b>                                             | <b>ENSG0000010239306</b> |
| ID4                     | inhibitor of DNA binding 4, HLH protein                      | ENSG00000102201          | <b>ETV5</b>   | <b>ETS variant 5</b>                                                            | <b>ENSG00000164405</b>   |
| NFKBIA                  | NFkB inhibitor alpha                                         | ENSG00000100906          | MDN           | midolin                                                                         | ENSG00000167470          |
| MYC                     | v-myc avian myelocytomatosis viral oncogene hom olog         | ENSG00000106997          | PSMD12        | proteasome 26S subunit, non-ATPase 12                                           | ENSG00000109770          |
| NIPAL1                  | NIP A like domain containing 1                               | ENSG000001053293         | EGR2          | early gro wth response 2                                                        | ENSG00000102877          |
| FAM83G                  | family with sequence similarity 83 member G                  | ENSG00000108822          | ZNF26         | zinc finger protein 26                                                          | ENSG00000108393          |
| BHLHE40                 | basic helix-loop-helix family member 40                      | ENSG00000104077          | <b>EGR1</b>   | <b>early gro wth response 1</b>                                                 | <b>ENSG00000120738</b>   |
| <b>UTP3</b>             | <b>UTP 3, small subunit, pro-cosme co mponent hom olog</b>   | <b>ENSG000001032467</b>  | CA2           | carbonic anhydrase 2                                                            | ENSG00000104267          |
| <b>TRB1</b>             | <b>triplets pseudokinase 1</b>                               | <b>ENSG000001073334</b>  | FOSL2         | FOS like 2, A P-1 transcription factor subunit                                  | ENSG00000105426          |
| FLG                     | filaggrin                                                    | ENSG00000104361          | FOSB          | FosB proto-oncogene, AP-1 transcription factor subunit                          | ENSG00000125740          |
| DUSP1                   | dual specificity phosphatase 1                               | ENSG00000102029          | NRARP         | NOTCH-regulated ankyrin repeat protein                                          | ENSG00000108435          |
| EREG                    | epiregulin                                                   | ENSG00000104882          | CLP2          | Kruppel like factor 2                                                           | ENSG000001027528         |
| CH25H                   | cholesterol 25-hydroxylase                                   | ENSG00000103835          | CMC2          | C-X9-C motif containing 2                                                       | ENSG00000103121          |
| ARL5B                   | A DP ribo sylation factor like GTPase 5B                     | ENSG000001065997         | CDKN1A        | cyclin dependent kinase inhibitor 1A                                            | ENSG000001024762         |
| GADD45A                 | growth arrest and DNA damage inducible alpha                 | ENSG00000106171          | CSRNP1        | cysteine and serine rich nuclear protein 1                                      | ENSG00000104455          |
| NFKBIZ                  | NFkB inhibitor zeta                                          | ENSG00000104402          | SLC25A25      | solute carrier family 25 member 25                                              | ENSG00000108339          |
| NFK3                    | nuclear factor, interleukin 3 regulated                      | ENSG00000105030          | ZCCHC12       | zinc finger CCHC-type containing 12                                             | ENSG000001074460         |
| <b>DUSP5</b>            | <b>dual specificity phosphatase 5</b>                        | <b>ENSG000001038466</b>  | NPPC          | natriuretic peptide C                                                           | ENSG000001063273         |
| 6orf141                 | chromosome 6 open reading frame 141                          | ENSG000001097261         | PHLDA1        | pleckstrin hom olog like domain family A member 1                               | ENSG00000109529          |
| DUSP6                   | dual specificity phosphatase 6                               | ENSG00000109318          | SPRY2         | sprouty R TK signaling antagonist 2                                             | ENSG00000106358          |
| RND3                    | Rho family GTPase 3                                          | ENSG000001015963         | <b>RAS11B</b> | <b>RA S like family I member B</b>                                              | <b>ENSG00000128045</b>   |
| GBP1                    | guanylate binding protein 1                                  | ENSG00000107228          | <b>NAGK</b>   | <b>N-acetylglucosamine kinase</b>                                               | <b>ENSG000001042557</b>  |
| QSOX1                   | quiescin sulphydryl oxidase 1                                | ENSG00000106260          | EGR4          | early gro wth response 4                                                        | ENSG00000105625          |
| L1Y6K                   | lymphocyte antigen 6 complex, locus K                        | ENSG000001060886         | EGR3          | early gro wth response 3                                                        | ENSG000001079388         |
| ZSWIM6                  | zinc finger SWIM-type containing 6                           | ENSG00000103049          | RG82          | regulator of G-protein signaling 2                                              | ENSG00000106741          |
| SBD5                    | SBD5 ribosome assembly guanine nucleotide exchange factor    | ENSG000001026524         | C2orf42       | chromosome 2 open reading frame 42                                              | ENSG000001015998         |
| SERPINE1                | serpin family E member 1                                     | ENSG00000106366          | BALAP2        | BALasso related protein 2                                                       | ENSG000001075866         |
| MCL1                    | BCL2 family antiapoptosis regulator                          | ENSG00000104384          | LIF           | leukemia inhibitory factor                                                      | ENSG000001028342         |
| GPR3                    | G protein-coupled receptor 3                                 | ENSG000001081773         | NR4A1         | nuclear receptor subfamily 4 group A member 1                                   | ENSG000001023558         |
| ERRF1                   | ERBB receptor feedback inhibitor 1                           | ENSG00000106285          | ATF3          | activating transcription factor 3                                               | ENSG00000106772          |
| MFSD2A                  | major facilitator superfamily domain containing 2A           | ENSG00000106389          | ARRDC4        | arrestin domain containing 4                                                    | ENSG000001040450         |
| SDC4                    | syndecan 4                                                   | ENSG00000102445          | BCL1D         | B-cell CLL/lymphoma 10                                                          | ENSG000001042867         |
| HBEGF                   | heparin binding EGF like growth factor                       | ENSG00000103070          | MAT2A         | methionine adenosyltransferase 2A                                               | ENSG000001068906         |
| BCR                     | BCR, RhoGEF and GTPase activating protein                    | ENSG000001086716         | FOS           | Fos proto-oncogene, AP-1 transcription factor subunit                           | ENSG00000170345          |
| <b>DDX21</b>            | <b>DDX21-box helicase 21</b>                                 | <b>ENSG000001065732</b>  | IL6           | interleukin 6                                                                   | ENSG00000106244          |
| <b>PSMD12</b>           | <b>proteasome 26S subunit, non-ATPase 12</b>                 | <b>ENSG0000010197170</b> |               |                                                                                 |                          |

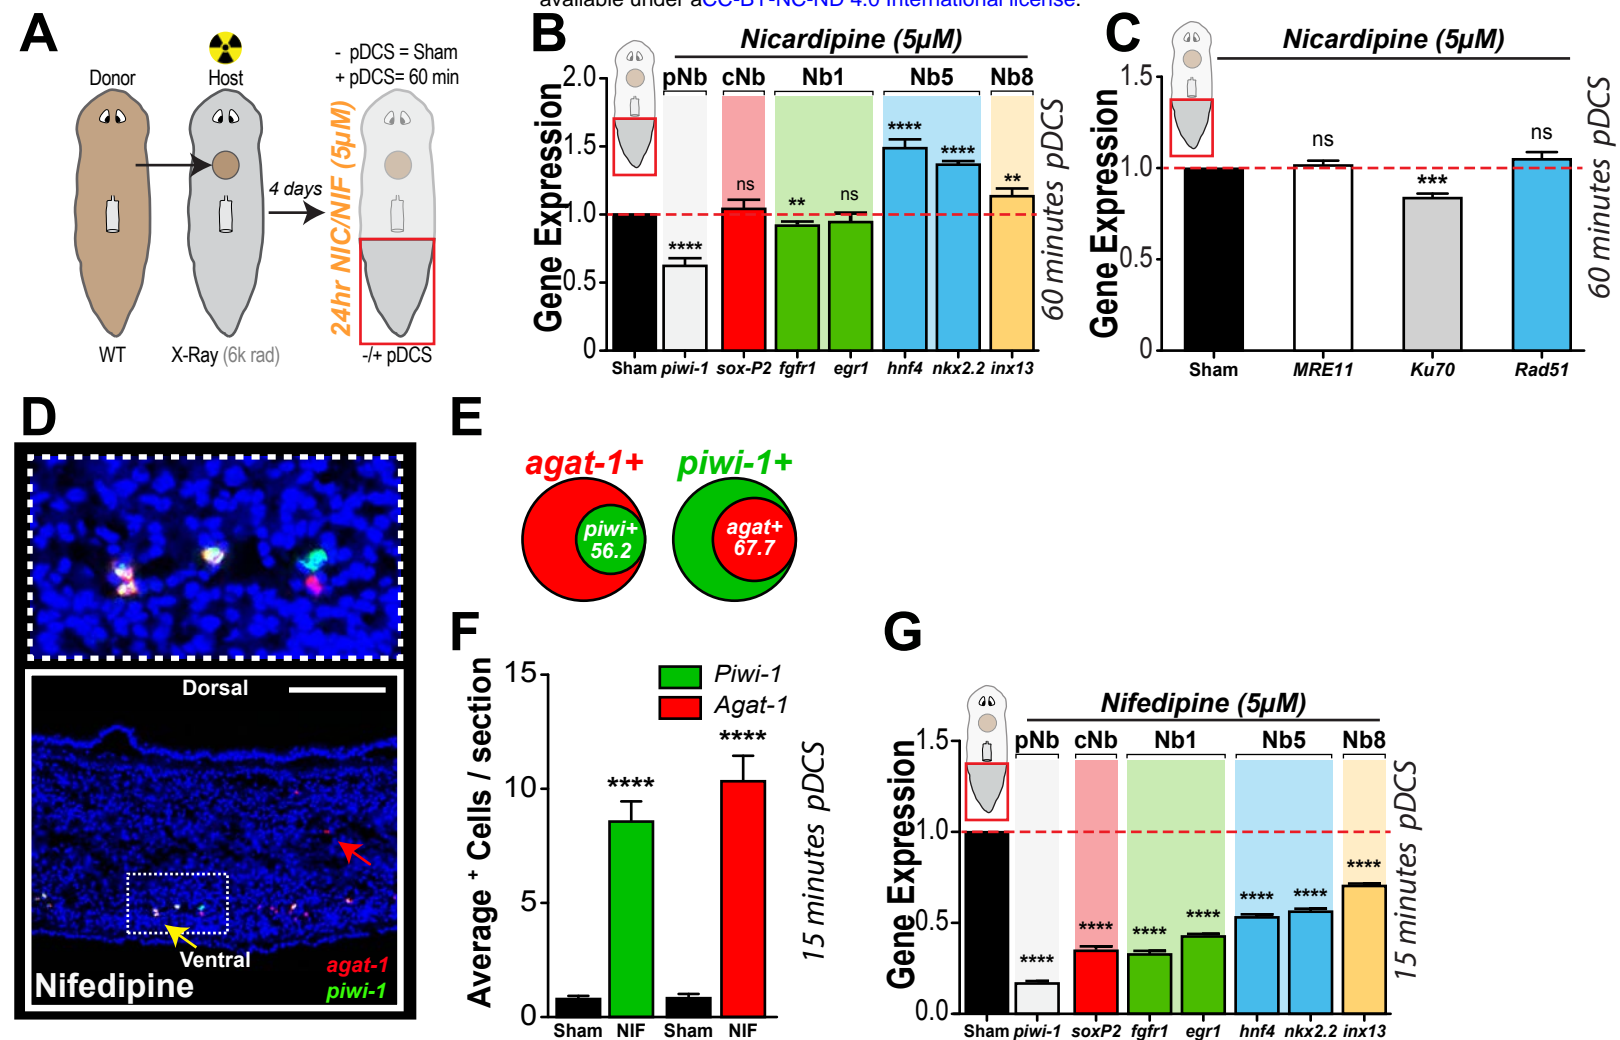

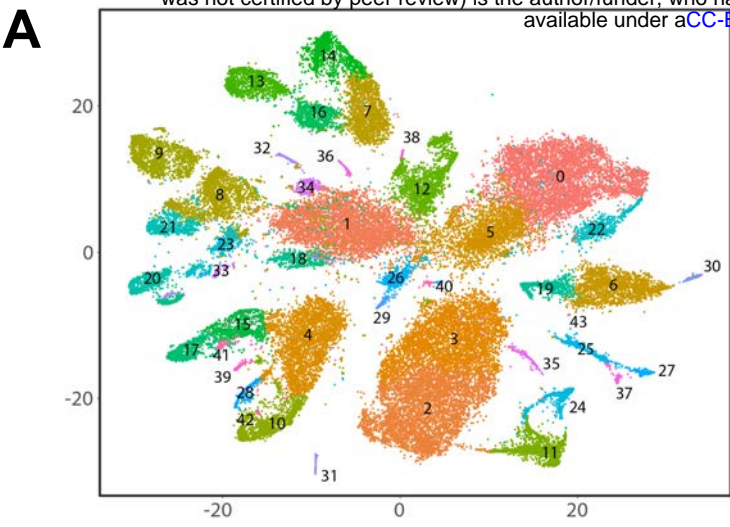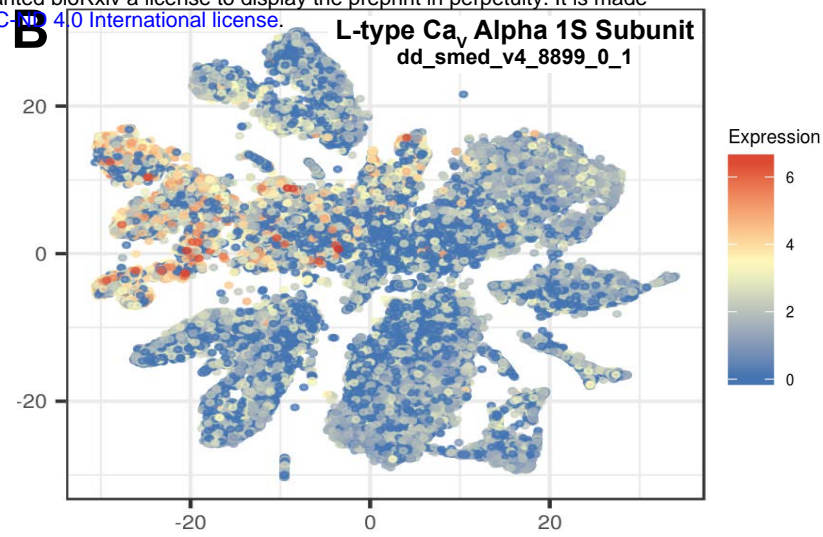

**C**

**Based on main clustering analysis:**

-----

*Neural:* 1, 8, 9, 18, 20, 21, 23, 33, 34; *Parenchymal:* 12, 38

**Based on subclustering:**

-----

*Cathepsin<sup>+</sup> cells:* 8, 10, 15; *Epidermal:* 5, 8, 12  
*Muscle:* 4, 8, 12; *Neural:* 7; *Parenchymal:* 7  
*Smedwi<sup>1</sup> cells:* 5, 6, 12, 15
